# Supplementary material for: Catalytic asymmetric α-alkylation of aldehydesvia a SN2′-type addition-elimination pathway
Source: Royal Society of Chemistry journal article supplement (doi:10.1039/c0sc00402b), 2011-01-01
Supplement: c0sc00402b.pdf [file c0sc00402b.pdf]

# Catalytic Asymmetric $\alpha$ -Alkylation of Aldehydes via a $S_N2'$ -Type Addition-Elimination Pathway

Enrique Gómez-Bengoa, Aitor Landa, Aitziber Lizarraga, Antonia Mielgo, Mikel Oiarbide, and Claudio Palomo.\*

*Departamento de Química Orgánica I, Facultad de Química, Universidad del País Vasco,  
Apdo. 1072, 20080 San Sebastián, Spain.*

## Electronic Supporting Information

### Contents

|                                                                                        |         |
|----------------------------------------------------------------------------------------|---------|
| 1. General.....                                                                        | S2      |
| 2. Materials.....                                                                      | S2      |
| 3. Experimental Procedures, Analytical and Spectroscopic Data:                         |         |
| 3.1. Preparation of aldehydes.....                                                     | S3      |
| 3.2. Preparation of (bromomethyl) acrylates <b>2-4</b> .....                           | S4      |
| 3.3. Preparation of catalyst <b>5b</b> .....                                           | S4      |
| 3.4. General procedure for the catalytic allylation of aldehydes with <b>2-4</b> ..... | S5      |
| 3.5. General procedure for the synthesis of racemic adducts.....                       | S5      |
| 3.6. Catalytic alkylation of butanal with preformed ammonium salt                      |         |
| 3.6.1 Generation and isolation of ammonium salt from bromide <b>2</b> and DMAP...      | S11     |
| 3.6.2 Catalytic allylation of butanal with the ammonium salt.....                      | S12     |
| 3.7. Catalytic alkylation of butanal with ethyl 2-(bromomethyl)cinnamate.....          | S12     |
| 3.8. Preparation of control sample by N-alkylation of catalyst <b>5b</b> .....         | S13     |
| 3.9. Elaboration of adducts:                                                           |         |
| 3.9.1. Lactonization: Synthesis of <b>10</b> .....                                     | S14     |
| 3.9.2. Ring closing metathesis: Synthesis of <b>11e</b> and <b>11f</b> .....           | S15     |
| 3.10. Stereochemical proofs.....                                                       | S16     |
| 4. $^1\text{H}$ and $^{13}\text{C}$ NMR Spectra.....                                   | S17-S36 |
| 5. HPLC of compounds.....                                                              | S37-S51 |
| 6. Computational calculations.....                                                     | S52-S71 |

## 1. General.

The  $^1\text{H}$  NMR and  $^{13}\text{C}$  NMR spectra were recorded at 300 MHz and 75 MHz respectively. The chemical shifts are reported in ppm relative to  $\text{CDCl}_3$  ( $\delta = 7.26$ ) for  $^1\text{H}$  NMR and relative to the central resonances of  $\text{CDCl}_3$  ( $\delta = 77.0$ ) for  $^{13}\text{C}$  NMR. Purification of reaction products was carried out by flash column chromatography using ROCC silica gel 60 (0.040-0.063mm, 230-400 mesh). Visualization was accomplished with a solution of phosphomolybdic acid (1 g) in 100 ml of ethanol (limited lifetime), followed by heating. Analytical high performance liquid chromatography (HPLC) was performed on Waters 600E chromatographs, equipped with diode array UV detector, using Daicel Chiralpak IC and OD-H columns. Optical rotations were recorded on a Perkin Elmer polarimeter. MS spectra were recorded on an ESI-ion trap Mass spectrometer (Agilent 1100 series LC/MSD, SL model).

## 2. Materials.

All solvents were of p.a. quality and were dried by standard procedures prior to use if necessary. Unless otherwise specified, materials were obtained from commercial sources and used without purification. Aldehydes were obtained from commercial sources, purified by distillation before usage, and stored in the fridge at  $-30^\circ\text{C}$  under argon, except aldehydes **1f**, **1i**, **1j**, **1k**, and **1l** that were prepared following the procedure described below. Catalyst **5a** was obtained from commercial sources and immediately before use was dissolved in  $\text{CH}_2\text{Cl}_2$  and washed with saturated  $\text{NaHCO}_3$ . The combined organic layers were dried over  $\text{MgSO}_4$  and the solvent evaporated under reduce pressure.

### 3. Experimental Procedures, Analytical and Spectroscopic Data.

#### 3.1. Preparation of aldehydes:

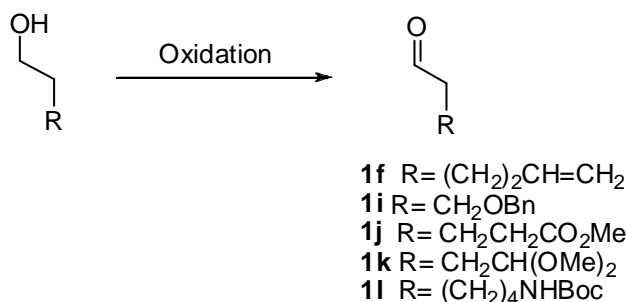

Aldehydes **1j** and **1k** were prepared according to procedures reported by Watanabe<sup>1</sup> and Tanaka<sup>2</sup> respectively.

##### 3.1.1 Synthesis of aldehydes **1f**, and **1i**.

The following procedure adapted from Pérez-Castells *et al.*<sup>3</sup> was employed.

A solution of the corresponding alcohol (10 mmol) in dichloromethane (4 mL) was added to a suspension of PCC (15 mmol) in dichloromethane (15 mL) at 0°C. The resulting mixture was stirred at room temperature until completion of the reaction (TLC). The reaction was diluted by addition of diethyl ether (50 mL) and filtered through a small pad of silica gel (and rinse with Et<sub>2</sub>O). The solvent was removed under vacuum at room temperature. The crude product was distilled before usage.

##### 3.1.2 Synthesis of Boc-protected 6-aminohexanal (**1l**).

The following procedure adapted from Cushman *et al.*<sup>4</sup> was employed.

CH<sub>2</sub>Cl<sub>2</sub> (100 mL) and (COCl)<sub>2</sub> (3.9 mL, 46 mmol, 1.5 eq.) were successively placed in an oven dried three-necked flask and the solution was cooled to -60°C under dry Ar. DMSO (4.8 mL, 68 mmol) in CH<sub>2</sub>Cl<sub>2</sub> (15 mL) was added at a rate where a temperature below -60°C was maintained. The mixture was then stirred for ca. 5 min followed by dropwise addition of a solution of the alcohol (31 mmol) in CH<sub>2</sub>Cl<sub>2</sub> (25 mL) over a period of ca. 5 min. The mixture was stirred for an additional 25 min, then rapidly quenched with Et<sub>3</sub>N (22 mL, 0.16 mol). The obtained white slurry was stirred for ca. 5 min and then allowed to

<sup>1</sup> Kai, K.; Takeuchi, J.; Kataoka, T.; Yokoyama, M.; Watanabe, N. *Tetrahedron* **2008**, 6760.

<sup>2</sup> Takeishi, K.; Sugishima, K.; Sasaki, K.; Tanaka, K. *Chem. Eur. J.* **2004**, 10, 5681.

<sup>3</sup> Rosillo, M.; Arnáiz, E.; Abdi, D.; Blanco-Urgoiti, J.; Domínguez, G.; Pérez-Castells J. *Eur. J. Org. Chem.* **2008**, 3917.

<sup>4</sup> Xiao, X.; Antony, S.; Kohlhagen, G.; Pommierb, Y.; Cushman, M. *Bioorg. Med. Chem.* **2004**, 12, 5147.

warm to room temperature. The reaction mixture was washed with water (300 mL) and the aqueous layer was extracted with Et<sub>2</sub>O (300 mL). The combined organic layers were washed with brine (2 x 200 mL). The residue was subjected to flash chromatography (eluent: n-hexane/ethyl acetate 5:1), yielding a colorless oil (yield 90%).

### 3.2. Preparation of 2-(bromomethyl) acrylates 2-4.

2-(Bromomethyl) acrylates **2**, **3** and **4** were prepared by sequential Morita-Baylis-Hillman reaction, according to Ratovelomanana-Vidal,<sup>5</sup> and subsequent bromination, according to Hediger.<sup>6</sup>

### 3.3. Preparation of catalyst **5b**.<sup>7</sup>

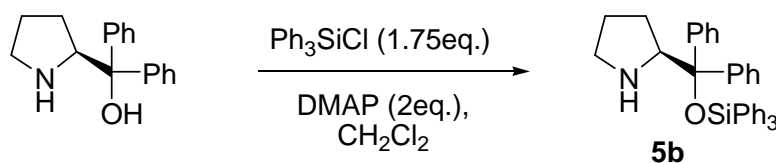

To a solution of (S)- $\alpha,\alpha$ -diphenylprolinol (20 mmol, 5.06g) in dry THF (40 mL) were successively added DMAP (4.88 g, 40 mmol, 2 eq.) and triphenylchlorosilane (10.4g, 35 mmol, 1.75 eq.). The mixture was refluxed for 20h, then cooled to room temperature and quenched with H<sub>2</sub>O (10 mL). Solvents were evaporated and to the obtained solid CH<sub>2</sub>Cl<sub>2</sub> (100 mL) and H<sub>2</sub>O (100 mL) were added. The organic layer was dried (MgSO<sub>4</sub>), the solvent was evaporated and the crude was purified by flash column chromatography (eluent: from CH<sub>2</sub>Cl<sub>2</sub> to CH<sub>2</sub>Cl<sub>2</sub>/EtOH 95:5). Further crystallization from ethyl acetate afforded pure **5b** as a white solid (7.60g, 15 mmol, 75% yield).

<sup>5</sup> Pautigny, C.; Jeulin, S.; Ayad, T.; Zhang, Z.; Genat, J.P.; Ratovelomanana-Vidal, V. *Adv. Synth. Catal.* **2008**, *350*, 2525..

<sup>6</sup> Hediger, M. E. *Bioorg. Med. Chem.* **2004**, *12*, 4995.

<sup>7</sup> Wang, Y.; Li, P.; Liang, X.; Ye, J. *Adv. Synth. Catal.* **2008**, *350*, 1383.

### 3.4. General procedure for the catalytic allylation of aldehydes with 2-4.

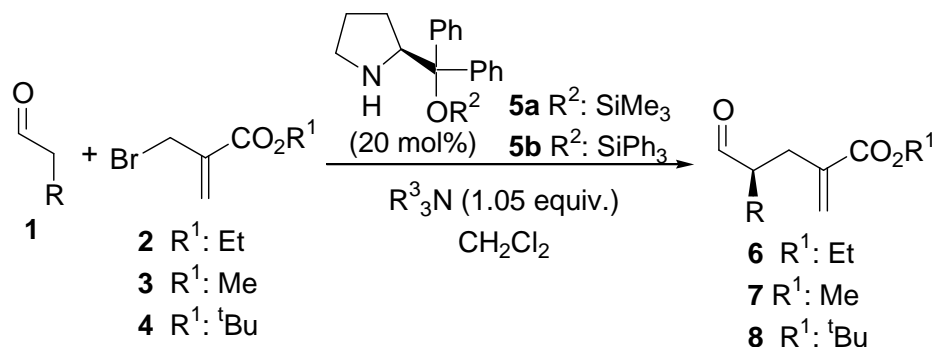

A solution of the corresponding  $\alpha$ -bromomethyl acrylates **2-4** (0.5 mmol) and DMAP (or DABCO) (63 mg, 0.51 mmol) in  $CH_2Cl_2$  (1.5 mL) was stirred at room temperature for 30 minutes and then was cooled to the specified temperature (Table 2). To this cooled solution were successively added freshly distilled aldehyde **1** (3 or 4 equiv.; see below) and catalyst **5** (0.1 mmol, 20 mol%). The mixture was stirred at specified temperature and time (see below), then diluted with dichloromethane (10 mL), washed with  $H_2O$  (10 mL), HCl 1N (10 mL) and brine (10 mL), and dried with anhydrous  $MgSO_4$ . The solvent was evaporated under vacuum and the crude material was purified by flash chromatography (eluent EtOAc/Hex from 1:99 to 2:98).

### 3.5. General procedure for the synthesis of racemic adducts.

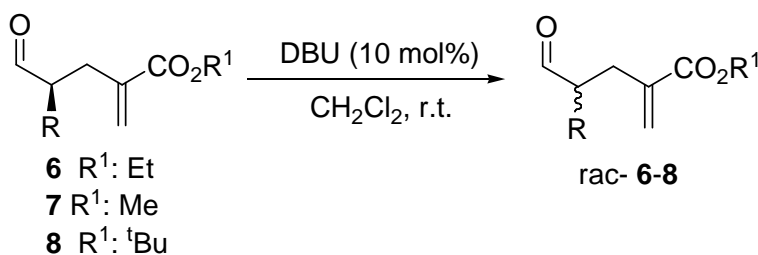

To a solution of the corresponding optically active adducts **6-8** in  $CH_2Cl_2$  was added DBU (10 mol%). The reaction was stirred at room temperature for 3h and afterwards quenched with  $H_2O$  and extracted with  $CH_2Cl_2$  (3 x 10 mL). The combined organic layers were washed with HCl 1N (10 mL) and dried ( $MgSO_4$ ). The product was injected directly in the HPLC without further purification.

## Data of adducts:

### Ethyl (R)-4-benzyl-2-methylene-5-oxopentanoate (6a)

The title compound was prepared from hydrocinnamaldehyde **1a** (1.5 mmol, 3 eq.), ethyl  $\alpha$ -bromomethyl acrylate **2** (0.50 mmol) and DMAP (0.51 mmol) at  $-10^{\circ}\text{C}$  for 48h according to the general procedure. Yield: 73 mg, 0.29 mmol, 59%.  $[\alpha]_{\text{D}}^{25} = +13.7$  (c 1.0,  $\text{CH}_2\text{Cl}_2$ , 93% ee).  $^1\text{H-NMR}$  ( $\text{CDCl}_3$ , 500 MHz)  $\delta$ : 9.69 (d, 1H,  $J = 1.2$  Hz), 7.29-7.16 (m, 5H, Ar), 6.24 (d, 1H,  $J = 1.2$  Hz), 5.57 (d, 1H,  $J = 1.2$  Hz), 4.20 (q, 2H,  $J = 7.2$  Hz), 3.03-2.43 (m, 5H), 1.29 (t, 3H,  $J = 7.2$  Hz).  $^{13}\text{C-NMR}$  (75 MHz,  $\text{CDCl}_3$ )  $\delta$ : 203.5, 166.6, 138.3, 137.6, 129.0, 128.6, 127.4, 126.5, 60.9, 51.9, 35.1, 14.1. The enantiomeric excess was determined by HPLC with Chiralpack IC column at 210nm (hexane/ $i$ PrOH in the ratio of 90/10, flow rate = 0.5 mL/min  $t_{\text{r}} = 21.07$  min (minor),  $t_{\text{r}} = 26.86$  min (major)). HRMS:  $\text{C}_{15}\text{H}_{19}\text{O}_3$   $[\text{M}+\text{H}]^+$  calcd.: 247.1334, found: 247.1351.

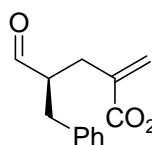

With DABCO, 5% of the Stetter adduct was identified.  $^1\text{H-NMR}$  data of the product Ethyl 2-methylene-4-oxo-6-phenylhexanoate ( $\text{CDCl}_3$ , 200 MHz)  $\delta$ : 7.31-7.20 (m, 5H), 6.33 (s, 1H), 5.73 (s, 1H), 4.83 (m, 2H), 4.25 (q, 2H,  $J = 7.2$  Hz), 3.00 (m, 1H), 2.71 (m, 1H), 1.31 (t, 3H,  $J = 7.2$  Hz).

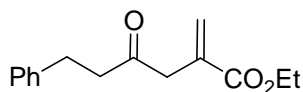

### Ethyl (R)-4-formyl-2-methylenehexanoate (6b)

The title compound was prepared from butyraldehyde **1b** (1.5 mmol, 3 eq.), ethyl  $\alpha$ -bromomethyl acrylate **2** (0.50 mmol) and DMAP (0.51 mmol) at  $-10^{\circ}\text{C}$  for 48h according to the general procedure. Yield: 58 mg, 0.31 mmol, 63%.  $[\alpha]_{\text{D}}^{25} = +12.0$  (c 1.0,  $\text{CH}_2\text{Cl}_2$ , 92% ee).  $^1\text{H-NMR}$  ( $\text{CDCl}_3$ , 300 MHz)  $\delta$ : 9.61 (d, 1H,  $J = 2.4$  Hz), 6.23 (d, 1H,  $J = 1.2$  Hz), 5.59 (d, 1H,  $J = 1.2$  Hz), 4.22 (q, 2H,  $J = 7.2$  Hz), 2.71 (dd, 1H,  $J = 13.8, 7.2$  Hz), 2.55-2.39 (m, 2H), 1.74-1.52 (m, 2H), 1.31 (t, 3H,  $J = 7.2$  Hz), 0.95 (t, 3H,  $J = 7.5$  Hz).  $^{13}\text{C-NMR}$  (75 MHz,  $\text{CDCl}_3$ )  $\delta$ : 204.1, 166.7, 137.9, 126.9, 60.8, 52.0, 31.0, 21.8, 14.1, 11.1. The enantiomeric excess was determined by HPLC with Chiralpack IC column at 210nm (hexane/ $i$ PrOH in the ratio of 95/5, flow rate = 0.5 mL/min  $t_{\text{r}} = 21.95$  min (minor),  $t_{\text{r}} = 25.66$  min (major)). HRMS:  $\text{C}_8\text{H}_{11}\text{O}_2$   $[\text{M}+\text{H}-\text{C}_2\text{H}_6\text{O}]^+$  calcd.: 139.0759, found: 139.0765.

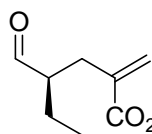

### Ethyl (R)-4-formyl-2-methyleneoctanoate (6c)

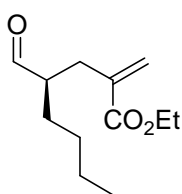

The title compound was prepared from hexanal **1c** (1.5 mmol, 3 eq.), ethyl  $\alpha$ -bromomethyl acrylate **2** (0.50 mmol) and DMAP (0.51 mmol) at  $-10^{\circ}\text{C}$  for 48h according to the general procedure. Yield: 64 mg, 0.305 mmol, 61%.  $[\alpha]_{\text{D}}^{25} = +18.4$  (c 1.4,  $\text{CH}_2\text{Cl}_2$ , 94% ee).  $^1\text{H-NMR}$  ( $\text{CDCl}_3$ , 300 MHz)  $\delta$ : 9.59 (d, 1H,  $J = 1.0$  Hz), 6.21 (d, 1H,  $J = 0.9$  Hz), 5.57 (d, 1H,  $J = 0.9$  Hz), 4.20 (q, 2H,  $J = 7.2$  Hz), 2.68 (dd, 1H,  $J = 14.0, 8.0$  Hz), 2.53 (m, 1H), 2.41 (dd, 1H,  $J = 14.0, 6.2$  Hz), 1.66-1.27 (m, 6H), 1.29 (t, 3H,  $J = 7.1$  Hz), 0.88 (t, 3H,  $J = 6.6$  Hz).  $^{13}\text{C-NMR}$  (75 MHz,  $\text{CDCl}_3$ )  $\delta$ : 204.1, 166.6, 137.9, 126.9, 60.8, 50.6, 31.4, 28.9, 28.5, 22.6, 14.1, 13.7. The enantiomeric excess was determined by HPLC with Chiralpack IC column at 216nm (hexane/ $i$ PrOH in the ratio of 90/10, flow rate = 0.5 mL/min  $t_{\text{r}} = 16.93$  min (minor),  $t_{\text{r}} = 18.58$  min (major)). HRMS:  $\text{C}_{10}\text{H}_{15}\text{O}_2$   $[\text{M}+\text{H}-\text{C}_2\text{H}_6\text{O}]^+$  calcd.: 167.1072, found: 167.1086.

### Ethyl (R)-4-formyl-5-methyl-2-methylenehexanoate (6d)

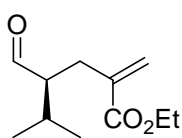

The title compound was prepared from isovaleraldehyde **1d** (1.5 mmol, 4eq.), ethyl  $\alpha$ -bromomethyl acrylate **2** (0.50 mmol) and DMAP (0.51 mmol) at  $0^{\circ}\text{C}$  for 60h according to the general procedure. Yield: 53 mg, 0.27 mmol, 54%.  $[\alpha]_{\text{D}}^{25} = +12.2$  (c 1.0,  $\text{CH}_2\text{Cl}_2$ , 90% ee).  $^1\text{H NMR}$  (300 MHz,  $\text{CDCl}_3$ )  $\delta$  9.64 (d, 1H,  $J = 2.9$  Hz), 6.20 (s, 1H,  $J = 0.9$  Hz), 5.58 (d, 1H,  $J = 0.9$  Hz), 4.20 (q, 2H,  $J = 7.1$  Hz), 2.74 – 2.35 (m, 3H), 2.11– 2.00 (m, 1H), 1.30 (t, 3H,  $J = 7.1$  Hz), 1.01 (d, 6H,  $J = 6.9$  Hz).  $^{13}\text{C NMR}$  (75 MHz,  $\text{CDCl}_3$ )  $\delta$  204.58, 166.76, 138.36, 126.90, 60.81, 56.74, 28.58, 28.45, 19.87, 19.63, 14.16. The enantiomeric excess was determined by HPLC with Chiralpack IC column at 210nm (hexane/ $i$ PrOH in the ratio of 95/5, flow rate = 0.5 mL/min  $t_{\text{r}} = 23.19$  min (minor),  $t_{\text{r}} = 25.19$  min (major)). HRMS:  $\text{C}_9\text{H}_{13}\text{O}_2$   $[\text{M}+\text{H}-\text{C}_2\text{H}_6\text{O}]^+$  calcd.: 153.0916, found: 153.0914.

### Ethyl (R)-4-formyl-2-methylenehept-6-enoate (6e)

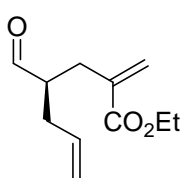

The title compound was prepared from pent-4-enal **1e** (2.0 mmol, 4 eq.), ethyl  $\alpha$ -bromomethyl acrylate **2** (0.50 mmol) and DMAP (0.51 mmol) at  $-20^{\circ}\text{C}$  for 60h according to the general procedure. Yield: 61 mg, 0.31 mmol, 63%.  $[\alpha]_{\text{D}}^{25} = + 5.5$  (c 1.0,  $\text{CH}_2\text{Cl}_2$ , 95% ee).  $^1\text{H-NMR}$  ( $\text{CDCl}_3$ , 300 MHz)  $\delta$ : 9.65 (d, 1H,  $J = 1.2$  Hz), 6.25 (d, 1H,  $J = 1.2$  Hz), 5.82-5.69 (m, 1H), 5.60 (d,

1H, J= 1.2 Hz), 5.10 (m, 2H), 4.21 (q, 2H, J= 7.2 Hz), 2.75-2.20 (m, 5H), 1.31 (t, 3H, J= 7.2 Hz). <sup>13</sup>C-NMR (75 MHz, CDCl<sub>3</sub>) δ: 203.4, 166.6, 137.6, 134.4, 127.3, 117.6, 60.8, 49.8, 32.9, 30.9, 14.1. The enantiomeric excess was determined by HPLC with Chiralpack IC column at 212nm (hexane/<sup>i</sup>PrOH in the ratio of 95/5, flow rate = 0.5 mL/min tr= 22.22 min (minor), tr= 24.38 min (major)). HRMS: C<sub>9</sub>H<sub>11</sub>O<sub>2</sub> [M+H-C<sub>2</sub>H<sub>6</sub>O]<sup>+</sup> calcd.: 151.0759, found: 151.0734.

#### Ethyl (R)-4-formyl-2-methyleneoct-7-enoate (6f)

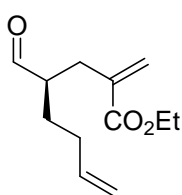

The title compound was prepared from hex-5-enal **1f** (2.0 mmol, 4 eq.), ethyl α-bromomethyl acrylate **2** (0.50 mmol) and DMAP (0.51 mmol) at -20°C for 60h according to the general procedure. Yield: 72 mg, 0.345 mmol, 69%. [α]<sub>D</sub><sup>25</sup> = + 11.0 (c 1.0, CH<sub>2</sub>Cl<sub>2</sub>, 93% ee). <sup>1</sup>H-NMR (CDCl<sub>3</sub>, 300 MHz) δ: 9.60 (d, 1H, J= 2.4 Hz), 6.21 (s, 1H), 5.81-5.68 (m, 1H), 5.57 (d, 1H, J= 1.2 Hz), 5.04-4.96 (m, 2H), 4.19 (q, 2H, J= 7.2 Hz), 2.69 (dd, 1H, J= 13.8, 7.8 Hz), 2.53 (m, 1H), 2.41 (dd, 1H, J= 14.0, 6.0 Hz), 2.08 (m, 2H), 1.74 (m, 1H), 1.52 (m, 1H), 1.28 (t, 3H, J= 7.2 Hz). <sup>13</sup>C-NMR (75 MHz, CDCl<sub>3</sub>) δ: 203.2, 166.2, 137.6, 137.2, 126.7, 115.2, 60.5, 49.6, 31.2, 30.6, 27.7, 13.9. The enantiomeric excess was determined by HPLC with Chiralpack IC column at 210nm (hexane/<sup>i</sup>PrOH in the ratio of 99/1, flow rate = 0.5 mL/min tr= 35.5 min (minor), tr= 39.9 min (major)). HRMS: C<sub>10</sub>H<sub>13</sub>O<sub>2</sub> [M+H-C<sub>2</sub>H<sub>6</sub>O]<sup>+</sup> calcd.: 165.0916, found: 165.0930.

#### Ethyl (4S,5R)-4-formyl-5,9-dimethyl-2-methylenedec-8-enoate (6g)

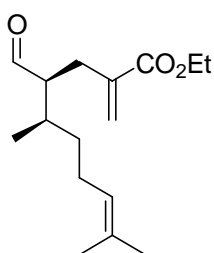

The title compound was prepared from (R)-(+)-citronellal **1g** (1.5 mmol, 3 eq.), ethyl α-bromomethyl acrylate **2** (0.50 mmol) and DMAP (0.51 mmol) at 20°C for 48h according to the general procedure. Yield mixture: 90 mg, 0.34 mmol, 68% (diastereomeric ratio 75:25). <sup>1</sup>H NMR (mayor) (300 MHz, CDCl<sub>3</sub>) δ 9.64 (d, 1H, J = 2.4 Hz), 6.21 (d, 1H, J= 0.9 Hz), 5.60 (d, 1H, J = 0.9 Hz), 5.08 (m, 1H), 4.21 (q, 2H, J = 6.9 Hz), 2.71–2.41 (m, 3H), 2.05–1.90 (m, 3H), 1.69 (s, 3H), 1.64 (s, 3H), 1.50 (m, 1H), 1.34 (t, 3H, J = 7.2 Hz), 0.95 (d, 2H, J= 6.9 Hz), 0.90 (m, 2H).



### Ethyl (4S,5S)-4-formyl-5,9-dimethyl-2-methylenedec-8-enoate (6h)

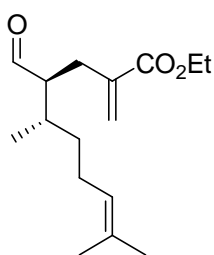

The title compound was prepared from (S)-(-)-citronellal **1h** (1.5 mmol, 3 eq.), ethyl  $\alpha$ -bromomethyl acrylate **2** (0.50 mmol) and DMAP (0.51 mmol) at 20°C for 48h according to the general procedure. Yield: 93 mg, 0.35 mmol, 70% (diastereomeric ratio 97:3).  $^1\text{H}$  NMR (major) (300 MHz,  $\text{CDCl}_3$ )  $\delta$  9.71 (d, 1H,  $J = 2.6$  Hz), 6.24 (d, 1H,  $J = 1.2$  Hz), 5.62 (d, 1H,  $J = 1.2$  Hz), 5.11 (m, 1H), 4.24 (q, 2H,  $J = 7.1$  Hz), 2.76 (dd, 1H,  $J = 14.0, 8.8$  Hz), 2.66–2.35 (m, 2H), 2.17–1.90 (m, 3H), 1.72 (s, 3H), 1.64 (s, 3H), 1.50 (m, 1H), 1.34 (t, 3H,  $J = 7.1$  Hz), 1.04 (d, 2H,  $J = 6.9$  Hz), 0.90 (m, 2H).  $^{13}\text{C}$  NMR (major) (75 MHz,  $\text{CDCl}_3$ )  $\delta$  204.6, 166.7, 138.4, 131.9, 126.0, 123.9, 111.3, 60.8, 55.4, 34.2, 33.5, 28.78, 25.7, 17.7, 16.59, 14.2. HRMS:  $\text{C}_{16}\text{H}_{26}\text{O}_3$   $[\text{M}+\text{H}]^+$  calcd.: 267.1960, found: 267.1963.

### Ethyl (S)-5-(benzyloxy)-4-formyl-2-methylenepentanoate (6i)

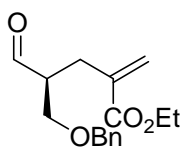

The title compound was prepared from aldehyde **1i** (1.5 mmol, eq.), ethyl  $\alpha$ -bromomethyl acrylate **2** (0.50 mmol) and DMAP (0.51 mmol) at -10°C for 60h according to the general procedure. Yield: 81 mg, 0.29 mmol, 59%.  $[\alpha]_{\text{D}}^{25} = +7.7$  (c 0.5,  $\text{CH}_2\text{Cl}_2$ , 68% ee).  $^1\text{H}$ -NMR ( $\text{CDCl}_3$ , 500 MHz)  $\delta$ : 9.78(d, 1H,  $J = 1.2$  Hz), 7.38-7.30 (m, 5H, Ar), 6.25 (d, 1H,  $J = 1.2$  Hz), 5.62 (d, 1H,  $J = 1.2$  Hz), 4.52 (s, 2H), 4.23 (q, 2H,  $J = 7.2$  Hz), 4.22 (ddd, 2H,  $J = 25.8, 9.6, 4.8$  Hz), 2.88-2.50 (m, 3H), 1.32 (t, 3H,  $J = 7.2$  Hz).  $^{13}\text{C}$ -NMR (75 MHz,  $\text{CDCl}_3$ )  $\delta$ : 202.6, 166.6, 137.8, 137.5, 128.4, 127.8, 127.6, 127.4, 73.3, 67.9, 60.8, 50.9, 29.7, 28.5, 14.1. The enantiomeric excess was determined by HPLC with Chiralpack IC column at 210nm (hexane/ $^i\text{PrOH}$  in the ratio of 95/5, flow rate = 0.5 mL/min  $t_{\text{r}} = 43.2$  min (minor),  $t_{\text{r}} = 57.3$  min (major)).

### (R)-1-Ethyl 7-methyl-4-formyl-2-methyleneheptanedioate (6j)

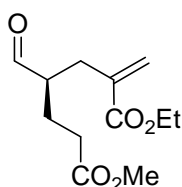

The title compound was prepared from methyl 5-oxopentanoate **1j** (1.5 mmol, 3 eq.), ethyl  $\alpha$ -bromomethyl acrylate **2** (0.50 mmol) and DMAP (0.51 mmol) at -10 °C for 60 hours according to the general procedure. Yield: 75 mg, 0.31 mmol, 62%.  $[\alpha]_{\text{D}}^{25} = +3.2$  (c 1.0,  $\text{CH}_2\text{Cl}_2$ , 90% ee).  $^1\text{H}$  NMR (300 MHz,  $\text{CDCl}_3$ )  $\delta$  9.62 (d, 1H,  $J = 2.1$ ), 6.25 (d, 1H,  $J = 0.9$ ), 5.62 (d, 1H,  $J = 1.1$ ), 4.31 – 4.10 (m, 2H), 3.66 (d, 3H,  $J = 2.8$ ), 2.80 – 2.53 (m, 2H), 2.48 – 2.28 (m, 3H), 1.96 (ddd, 1H,  $J = 4.8, 9.6, 22.5$ ), 1.87 – 1.63 (m, 1H), 1.30 (t, 3H,  $J = 7.1$ ), 0.92 – 0.81

(m, 1H).  $^{13}\text{C}$  NMR (75 MHz,  $\text{CDCl}_3$ )  $\delta$  203.00, 173.19, 166.47, 135.46, 127.89, 60.91, 49.71, 31.43, 31.14, 23.47, 14.09. The enantiomeric excess was determined by HPLC with Chiralpack IC column at 220nm (hexane/ $^i\text{PrOH}$  in the ratio of 80/20, flow rate = 0.5 mL/min  $t_r$  = 34.54 min,  $t_r$  = 37.70 major).

#### Ethyl (S)-4-formyl-6,6-dimethoxy-2-methylenehexanoate (6k)

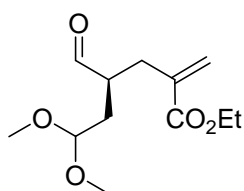

The title compound was prepared from 4,4-dimethoxybutanal **1k** (1.5 mmol), ethyl  $\alpha$ -bromomethyl acrylate **2** (0.50 mmol) and DMAP (0.51 mmol) at  $-10^\circ\text{C}$  for 60 hours according to the general procedure. Yield: 71 mg, 0.29 mmol, 58%.  $[\alpha]_D^{25} = +5.4$  (c1.0,  $\text{CH}_2\text{Cl}_2$ , 87% ee).  $^1\text{H-NMR}$  ( $\text{CDCl}_3$ , 500 MHz)  $\delta$ : 9.69(d, 1H,  $J = 1.2$  Hz), 7.29-7.16 (m, 5H, Ar), 6.24 (d, 1H,  $J = 1.2$  Hz), 5.57 (d, 1H,  $J = 1.2$  Hz), 4.20 (q, 2H,  $J = 7.2$  Hz), 3.03-2.43 (m, 5H), 1.29 (t, 3H,  $J = 7.2$  Hz).  $^{13}\text{C}$  NMR (75 MHz,  $\text{CDCl}_3$ )  $\delta$  203.03, 166.21, 137.47, 127.45, 103.08, 60.92, 53.85, 53.27, 46.62, 32.39, 31.69, 14.09. The enantiomeric excess was determined by HPLC with Chiralpack IC column at 220nm (hexane/ $^i\text{PrOH}$  in the ratio of 80/20, flow rate = 0.5 mL/min  $t_r$  = 21.10 min,  $t_r$  = 27.38 major).

#### Ethyl (R)-8-(tert-butoxycarbonylamino)-4-formyl-2-methyleneoctanoate (6l)

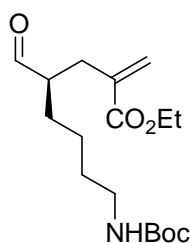

The title compound was prepared from N-Boc-amino-1-hexanal **1l** (1.5 mmol), ethyl  $\alpha$ -bromomethyl acrylate **2** (0.50 mmol) and DMAP (0.51 mmol) at  $-10^\circ\text{C}$  for 60h according to the general procedure. Yield: 102 mg, 0.31 mmol, 62%.  $[\alpha]_D^{25} = +15.4$  (c 1.0,  $\text{CH}_2\text{Cl}_2$ , 94% ee).  $^1\text{H}$  NMR (300 MHz,  $\text{CDCl}_3$ )  $\delta$  9.58 (d, 1H,  $J = 2.5$ ), 6.21 (d, 1H,  $J = 1.0$ ), 5.57 (d, 1H,  $J = 1.1$ ), 4.53 (s, 1H), 4.19 (q, 2H,  $J = 7.1$ ), 3.18 – 3.00 (m, 2H), 2.67 (dd, 1H,  $J = 7.5$ , 13.6), 2.59 – 2.45 (m, 1H), 2.39 (dd, 1H,  $J = 5.2$ , 13.5), 1.42 (s, 12H), 1.27 (dd, 5H,  $J = 6.7$ , 13.8), 0.84 (dd, 1H,  $J = 4.3$ , 10.9).  $^{13}\text{C}$  NMR (75 MHz,  $\text{CDCl}_3$ )  $\delta$  203.85, 166.62, 155.96, 137.71, 127.13, 60.88, 50.53, 40.20, 31.44, 30.07, 28.40, 24.00, 14.14. The enantiomeric excess was determined by HPLC with Chiralpack IC column at 210nm (hexane/ $^i\text{PrOH}$  in the ratio of 70/30, flow rate = 0.5 mL/min  $t_r$  = 27.2 min (major),  $t_r$  = 30.5 min (minor)).

### Methyl (R) 4-benzyl-2-methylene-5-oxopentanoate (7a)

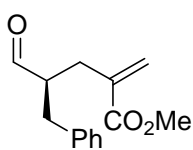

The title compound was prepared from hydrocinnamaldehyde **1a** (1.5 mmol), methyl  $\alpha$ -bromomethyl acrylate **3** (0.50 mmol) and DMAP (0.51 mmol) at  $-10\text{ }^{\circ}\text{C}$  for 60 hours according to the general procedure. Yield: 66 mg, 0.28 mmol, 57%.  $[\alpha]_{\text{D}}^{25} = +6.2$  (c 1.0,  $\text{CH}_2\text{Cl}_2$ , 94% ee).  $^1\text{H-NMR}$  ( $\text{CDCl}_3$ , 500 MHz)  $\delta$ :  $^1\text{H NMR}$  (300 MHz,  $\text{CDCl}_3$ )  $\delta$  9.66 (d, 1 H,  $J = 2.0$  Hz), 7.38 – 7.08 (m, 5H), 6.23 (s, 1H), 5.57 (d, 1H,  $J = 1.1$  Hz), 3.72 (s, 3H), 2.95 (tt, 2H,  $J = 4.8, 7.7$  Hz), 2.81 – 2.66 (m, 2H), 2.44 (dd, 1H,  $J = 4.6, 14.6$  Hz).  $^{13}\text{C NMR}$  (75 MHz,  $\text{CDCl}_3$ )  $\delta$  208.14, 203.35, 166.98, 138.16, 137.24, 128.95, 128.49, 127.58, 126.47, 51.86, 51.75, 35.04, 31.34. The enantiomeric excess was determined by HPLC with Chiralpack IC column at 220nm (hexane/ $^i\text{PrOH}$  in the ratio of 85/15, flow rate = 0.5 mL/min  $t_{\text{r}} = 19.8$  min,  $t_{\text{r}} = 23.1$  major).

### 3.6. Catalytic alkylation of butanal with preformed ammonium salt.

#### 3.6.1. Generation and isolation of ammonium salt from bromide **2** and DMAP.

(Adapted from Mayr et al, *Chem. Eur. J.* **2010**, *16*, 1365-1371)

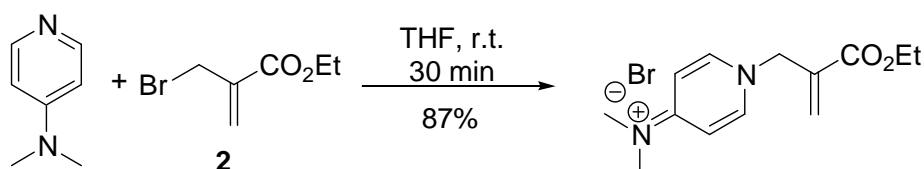

To a solution of the ethyl  $\alpha$ -bromomethyl acrylate **2** (190 mg, 1.0 mmol) in THF (5 mL) at room temperature was added DMAP (126 mg, 1.1 mmol). After 1 min of stirring of the initial solution, a white solid appeared. The mixture was stirred for ca. 30 min. and afterwards the solid was filtered off and washed with THF giving 272 mg (87% yield) of the ammonium bromide salt as a white solid.  $^1\text{H-NMR}$  ( $\text{CDCl}_3$ , 500 MHz)  $\delta$ : 8.64 (d, 2H,  $J = 7.8$  Hz), 6.88 (d, 2H,  $J = 7.8$  Hz), 6.87 (s, 1H), 6.58 (s, 1H), 5.31 (s, 2H), 4.18 (q, 2H,  $J = 7.0$  Hz), 1.29 (t, 3H,  $J = 7.0$  Hz).  $^{13}\text{C-NMR}$  (75 MHz,  $\text{CDCl}_3$ )  $\delta$ : 165.1, 156.3, 142.9, 134.0, 133.6, 107.7, 61.5, 57.5, 40.4, 14.0. Anal. calcd. for  $\text{C}_{13}\text{H}_{19}\text{BrN}_2\text{O}_2$  (315.21): C, 49.54; H, 6.08; N, 8.89. Found: C, 49.36; H, 5.90; N, 9.09.

### 3.6.2. Catalytic allylation of butanal with the ammonium salt.

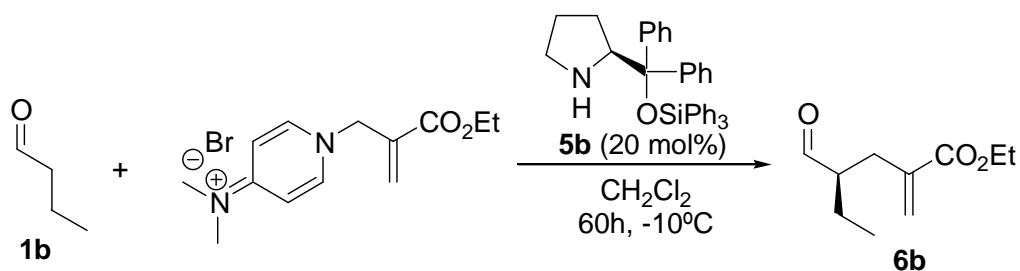

To a cooled solution of DMAP-2 salt (61 mg, 0.19 mmol) were successively added freshly distilled butanal **1b** (52  $\mu$ L, 0.58 mmol, 3 equiv.) and catalyst **5b** (19 mg, 0.038 mmol, 20 mol%). The mixture was stirred at  $-10\text{ }^{\circ}\text{C}$  for 60 h, then diluted with dichloromethane (10 mL), washed with  $\text{H}_2\text{O}$  (10 mL), HCl 1N (10 mL) and brine (10 mL), and dried with anhydrous  $\text{MgSO}_4$ . The solvent was evaporated under vacuum and the crude material was purified by flash chromatography (eluent EtOAc/Hex from 1:99 to 2:98). Yield: 20 mg (0.11 mmol, 57 %); *ee* 90 %.

All physic and spectroscopic data of thus obtained product were identical to the sample obtained following the catalytic General Procedure above.

### 3.7. Catalytic alkylation of butanal with ethyl 2-(bromomethyl) cinnamate **14**.

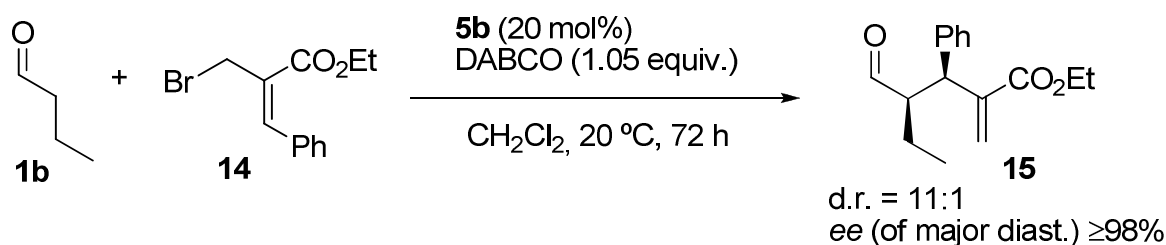

The General Procedure for the catalytic alkylation of aldehydes was followed, starting from butyraldehyde **1b** (5.36 mmol, 4 equiv., 704  $\mu$ L), ethyl 2-(bromomethyl) cinnamate (1.34 mmol, 350 mg) and DABCO (1.36 mmol, 152 mg), at  $0\text{ }^{\circ}\text{C}$  for 72 h. Only the shown regioisomer was detected as an 11:1 mixture of diastereomers. Yield: 139 mg, 0.53 mmol, 40%.  $^1\text{H-NMR}$  (major) ( $\text{CDCl}_3$ , 300 MHz)  $\delta$ : 9.50 (d, 1H,  $J=4.2$  Hz), 7.32-7.24 (m, 5H), 6.34 (s, 1H), 5.7 (s, 1H), 4.20-4.09 (m, 3H), 2.82 (m, 1H), 1.43-1.40 (m, 2H), 1.21 (t, 3H,  $J=7.2$  Hz), 0.81 (t, 3H,  $J=7.2$  Hz).  $^{13}\text{C-NMR}$  (major) (75 MHz,  $\text{CDCl}_3$ )  $\delta$ : 203.7, 166.3, 141.8, 139.6, 135.5, 128.6, 127.0, 125.5, 60.9, 56.7, 45.8, 21.2, 14.0, 11.1. The diastereomeric ratio (11:1) was determined by  $^1\text{H-NMR}$ . The enantiomeric excess was

determined by HPLC with Chiralpack IC column at 210nm (hexane/*i*PrOH in the ratio of 90/10, flow rate = 0.5 mL/min  $t_r$  = 18.55 min (major),  $t_r$  = 19.63 min (minor)).

### 3.8. Preparation of control sample by N-alkylation of catalyst **5b**.

For control purposes, N-alkylation of pyrrolidine **5b** was carried out as follow:

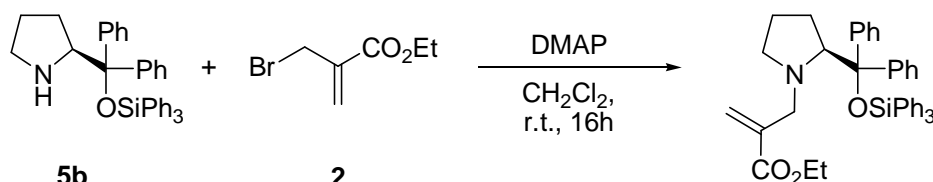

A solution of ethyl  $\alpha$ -bromomethyl acrylate **2** (47.5 mg, 0.25 mmol) and DMAP (31.1 mg, 0.255 mmol) in  $\text{CH}_2\text{Cl}_2$  (2 mL) was stirred at room temperature for 30 minutes and after this period catalyst **5b** was added (51 mg, 0.1 mmol). The mixture was stirred at room temperature for 16h and after this time, the reaction mixture was diluted with dichloromethane (5 mL), washed with  $\text{H}_2\text{O}$  (5 mL) and HCl 1N (5 mL), and dried with anhydrous  $\text{MgSO}_4$ . The solvent was evaporated and the crude compound was purified by flash chromatography (eluent EtOAc/Hex 1:5). Yield: 56 mg, 0.09 mmol, 90%.  $^1\text{H-NMR}$  ( $\text{CDCl}_3$ , 300 MHz)  $\delta$ : 7.48-7.24 (m, 25H), 6.25 (s, 1H), 5.82 (d, 1H,  $J$  = 1.8 Hz), 4.11 (m, 2H), 3.86 (dd, 1H,  $J$  = 9.4, 3.6 Hz), 3.25 (m, 2H), 2.80 (m, 1H), 2.20-1.03 (m, 5H), 1.25 (t, 3H,  $J$  = 7.2 Hz).  $^{13}\text{C-NMR}$  (75 MHz,  $\text{CDCl}_3$ )  $\delta$ : 166.8, 144.6, 143.9, 139.2, 136.2, 135.5, 129.9, 129.5, 129.2, 127.4, 127.0, 126.9, 126.8, 125.1, 86.3, 72.6, 60.2, 58.2, 55.0, 29.7, 24.1, 14.1.

### 3.9. Elaboration of adducts:

#### 3.9.1. Lactonization:

##### Synthesis of (R)-5-allyl-3-methylene-tetrahydropyran-2-one **10**.<sup>8</sup>

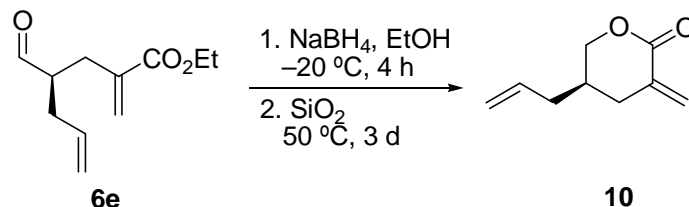

115 mg (0,58 mmol, 1.0 equiv.) of **6e** was solved in 1.5 mL of EtOH. The solution was cooled to -20 °C and 7 mg (0.18 mmol) of NaBH<sub>4</sub> was added. The reaction mixture was stirred at this temperature for 4 h, then diluted with dichloromethane (10mL) and poured in H<sub>2</sub>O (10 mL). Water phase was extracted three times with dichloromethane and the combined organic layers were dried with anhydrous MgSO<sub>4</sub>. After evaporation of the solvents under vacuum the crude product was dissolved in 1.5 mL of dichloromethane. 250 mg of silica gel was added and the mixture stirred at 50°C for 3 days. After filtration the solvent was evaporated under vacuum and the crude product was purified by column chromatography (eluent EtOAc/hexane 1:7) giving product **10** as viscous oil. Yield: 78 mg, 0.51 mmol, 89%. [ $\alpha$ ]<sub>D</sub><sup>25</sup> = -2.0 (c 1.25, CH<sub>2</sub>Cl<sub>2</sub>, 99% ee) (Lit: [ $\alpha$ ]<sub>D</sub><sup>25</sup> = -4.24 (c 1.25, CH<sub>2</sub>Cl<sub>2</sub>)<sup>8</sup>. <sup>1</sup>H-NMR (CDCl<sub>3</sub>, 300 MHz)  $\delta$ : 6.46 (d, 1H, J= 2.1 Hz), 5.79 (m, 1H), 5.59 (d, 1H, J= 2.1 Hz), 5.07-5.03 (m, 2H), 4.32 (ddd, 1H, J= 11.2, 3.2, 2.1 Hz), 4.08 (ddd, 1H, J= 11.2, 8.4, 3.2 Hz), 2.81 (m, 1H), 2.36 (m, 1H), 2.16 (m, 3H). The enantiomeric excess was determined by HPLC with Chiralpack OD-H column at 220nm (hexane/<sup>i</sup>PrOH in the ratio of 99/1, flow rate = 0.5 mL/min tr= 41.7 min (minor), tr= 42.6 min (major)). HRMS: C<sub>9</sub>H<sub>13</sub>O<sub>2</sub> [M+H]<sup>+</sup> calcd.: 153.0916, found: 153.0905.

#### Lactonization of adduct **15**

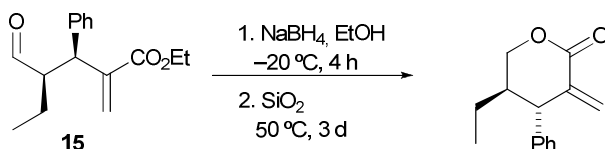

<sup>8</sup> Lukasz, L.; Richter, B.; Krawczyk, H.; Jørgensen, K. A. *J. Org. Chem.* **2008**, *73*, 8337.

The title compound was prepared from adduct **15** (82 mg, 0.31 mmol) following the same experimental procedure as for compound **10**. Overall yield after two steps: 47 mg, 0.22 mmol, 70%. <sup>1</sup>H-NMR (CDCl<sub>3</sub>, 300 MHz) δ: 7.36-7.14 (m, 5H), 6.61 (dd, 1H, J= 2.4, 1.2 Hz), 5.33 (dd, 1H, J= 2.4, 1.2 Hz), 4.45 (dd, 1H, J= 11.1, 3.6 Hz), 4.11 (dd, 1H, J= 11.1, 9.0 Hz), 2.08 (m, 1H), 1.49-1.15 (m, 2H), 0.89 (t, 3H, J= 7.2 Hz).

### 3.9.2. Ring closing metathesis: Synthesis of **11e** and **11f**.

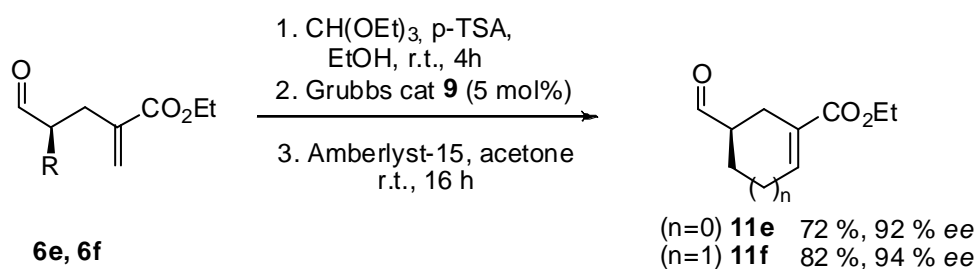

Triethyl orthoformate (83 μL, 0.5 mmol) and *p*TsOH·H<sub>2</sub>O (19 mg, 0.1 mmol, 20 mol%) were added to a solution adduct **6e-6f** (0.5 mmol) in EtOH (5 mL). The mixture was stirred for 4 h at room temperature. After dilution with dichloromethane (10 mL) the mixture was washed with 1% aqueous NaOH (10 mL) and the aqueous layer was extracted with dichloromethane (3 x 10 mL). The combined organic layers were dried (MgSO<sub>4</sub>) and evaporation of the solvent under reduced pressure gave the protected adduct as a brown oil, which was used as such in the next step. To a solution of this diethyl acetal protected aldehyde in dry dichloromethane (20 mL) and under Ar atmosphere, was added Grubbs second-generation catalyst **9** (22 mg, 5 mol%). The reaction mixture was refluxed for 12 h, afterwards diluted with dichloromethane (10 mL) and filtered through a small pad of silica gel (with dichloromethane rinsing). Evaporation of the solvent under reduced pressure gave an oil that was purified through column chromatography (eluent EtOAc/hexane 1:9). The metathesis product (0.4 mmol) was dissolved in acetone (3 mL) and H<sub>2</sub>O (0.3 mL, 10 vol %). Amberlyst-15 (15 mg) was then added and the heterogeneous mixture was stirred for 16 h at room temperature. Dry molecular sieves (3Å) were then added and the mixture was stirred for an additional ca. 30 min. The solids were filtered off and washed with acetone. Evaporation of the solvent under reduced pressure gave pure compounds **11e** and **11f**.

### Ethyl (R)-4-formylcyclopent-1-enecarboxylate (11e)

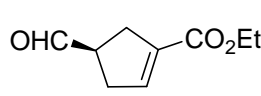 Overall yield from **6e** (0.5mmol): 60 mg, 0.36 mmol, 72%.  $[\alpha]_D^{25} = -9.9$  (c 1.0, CH<sub>2</sub>Cl<sub>2</sub>, 99% ee). <sup>1</sup>H-NMR (CDCl<sub>3</sub>, 300 MHz) δ: 9.69 (d, 1H, J= 1.5 Hz), 6.69 (t, 1H, J= 2.1 Hz), 4.21 (q, 2H, J= 7.2 Hz), 3.23-2.91 (m, 5H), 1.30 (t, 3H, J= 7.2 Hz). <sup>13</sup>C-NMR (75 MHz, CDCl<sub>3</sub>) δ: 201.5, 164.4, 141.0, 135.0, 60.4, 48.7, 33.1, 31.7, 14.2. The enantiomeric excess was determined by HPLC with Chiralpack IC column at 210nm (hexane/<sup>i</sup>PrOH in the ratio of 98/2, flow rate = 0.5 mL/min tr= 63.7 min (major), tr= 72.1 min (minor)).

### Ethyl (R)-5-formylcyclohex-1-enecarboxylate (11f)

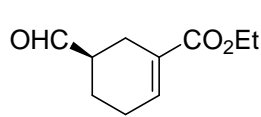 Overall yield from **6f** (0.29 mmol): 44 mg, 0.24 mmol, 82%.  $[\alpha]_D^{25} = -5.1$  (c 0.5, CH<sub>2</sub>Cl<sub>2</sub>, 94% ee). <sup>1</sup>H-NMR (CDCl<sub>3</sub>, 300 MHz) δ: 9.73 (s, 1H), 7.00 (m, 1H), 4.21 (q, 2H, J= 7.2 Hz), 2.63-1.59 (m, 7H), 1.30 (t, 3H, J= 7.2 Hz). <sup>13</sup>C-NMR (75 MHz, CDCl<sub>3</sub>) δ: 203.2, 166.8, 138.9, 128.6, 60.5, 45.7, 24.3, 23.5, 21.1, 14.2. The enantiomeric excess was determined by HPLC with Chiralpack IC column at 220nm (hexane/<sup>i</sup>PrOH in the ratio of 85/15, flow rate = 0.5 mL/min tr= 37.9 min (major), tr= 41.9 min (minor)). HRMS: C<sub>8</sub>H<sub>9</sub>O<sub>2</sub> [M+H-C<sub>2</sub>H<sub>6</sub>O]<sup>+</sup> calcd.: 137.0603, found: 137.0582.

### 3.10. Stereochemical proofs

Absolute configuration of adduct **6e** was determined by comparison of chiroptic data of its lactone derivative **10** with literature data. Assignment was confirmed by comparison of the order of elution on HPLC with that reported.

For the remaining adducts, absolute configuration was assumed on the basis of a uniform reaction mechanism.

The relative configuration of lactone from adduct **15** (major diastereomer) was determined to be *trans* by selective NOE experiments and correlation of the value of the H4-H5 coupling constant.



## 4. $^1\text{H}$ and $^{13}\text{C}$ NMR Spectra

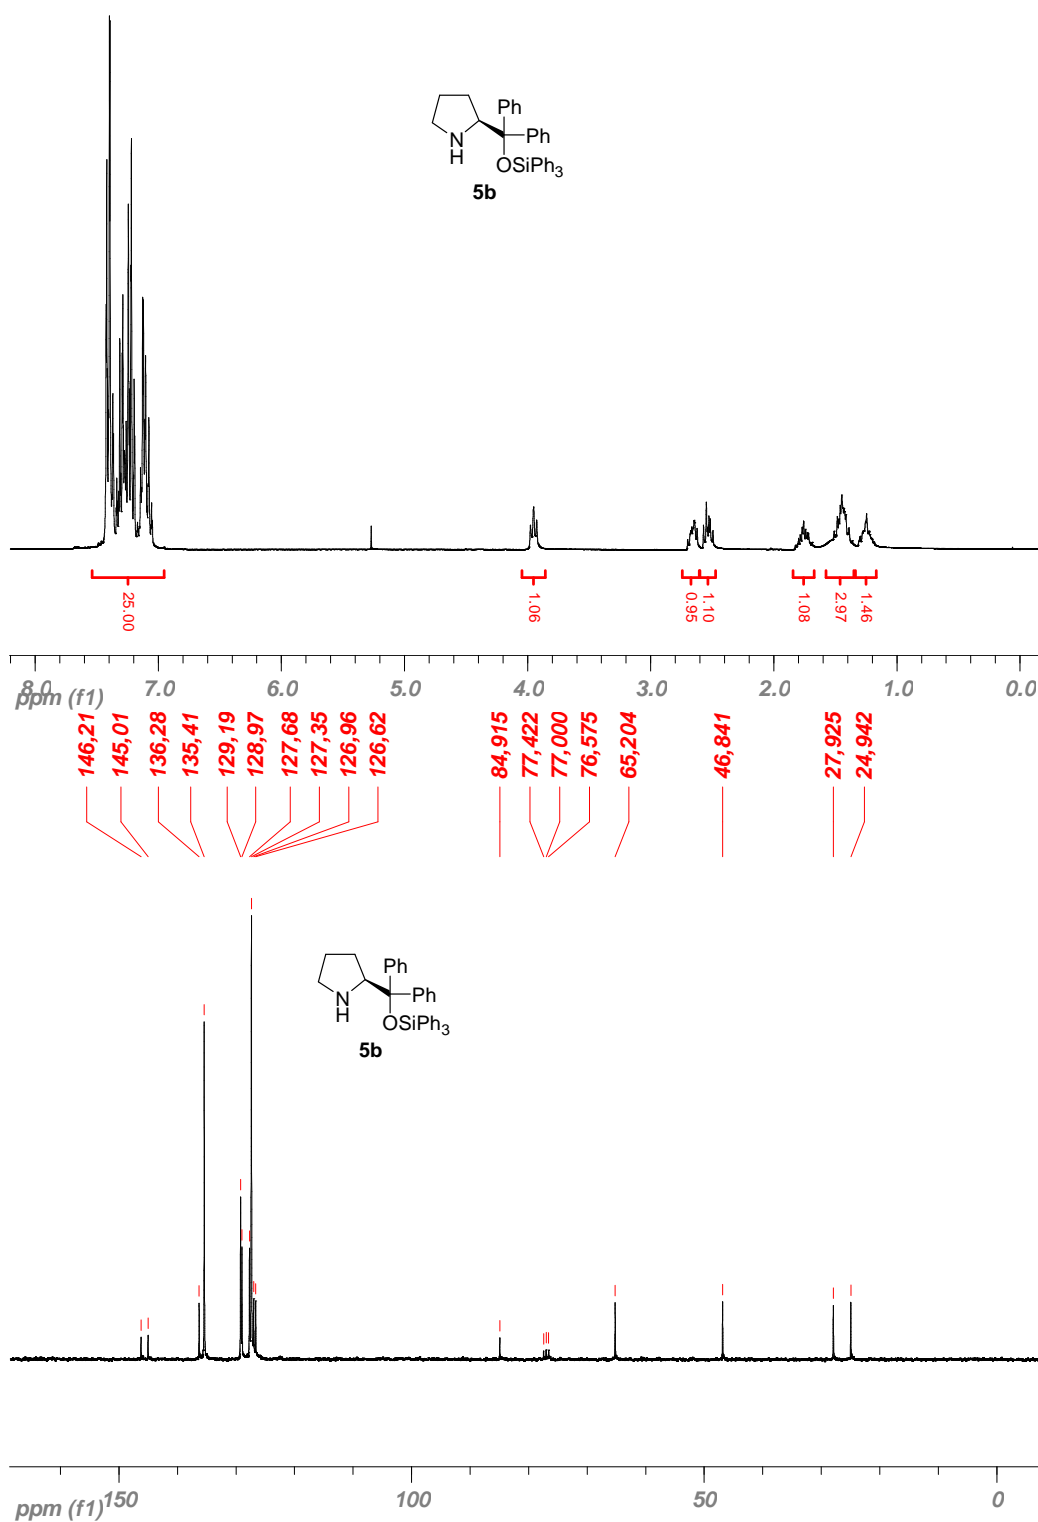

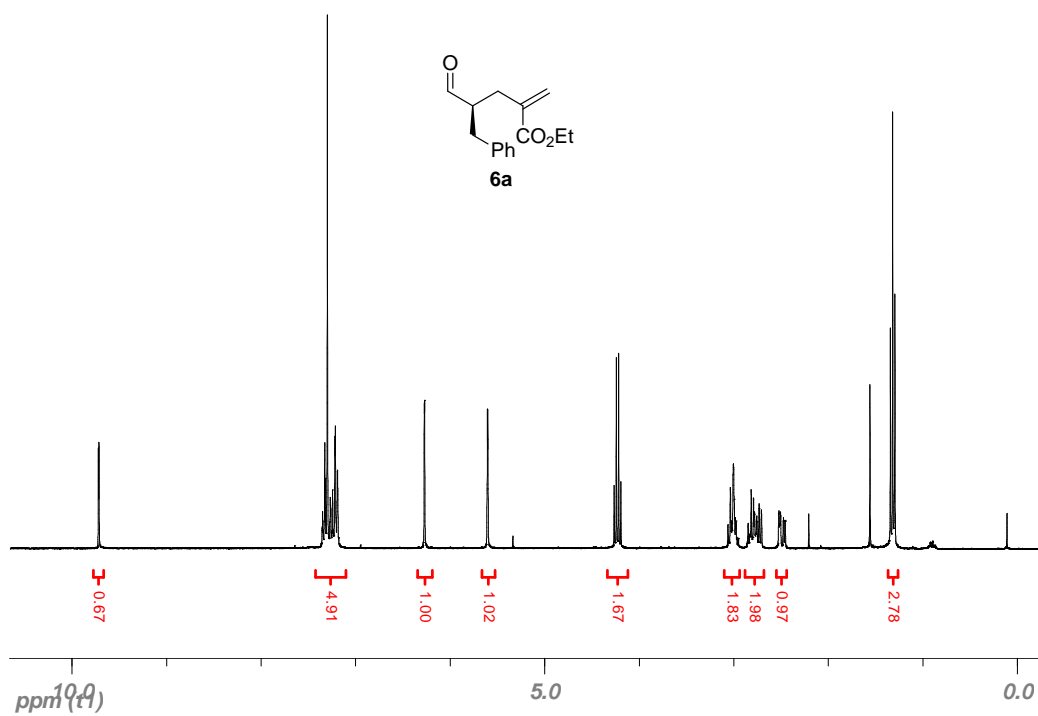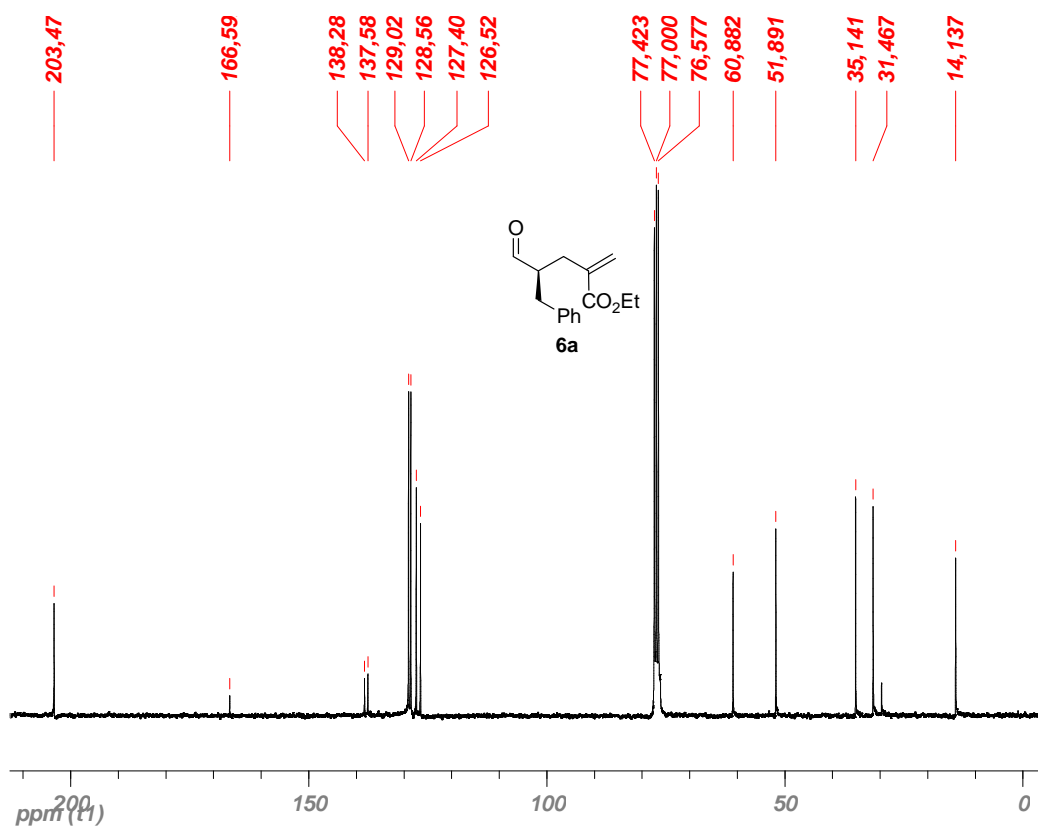

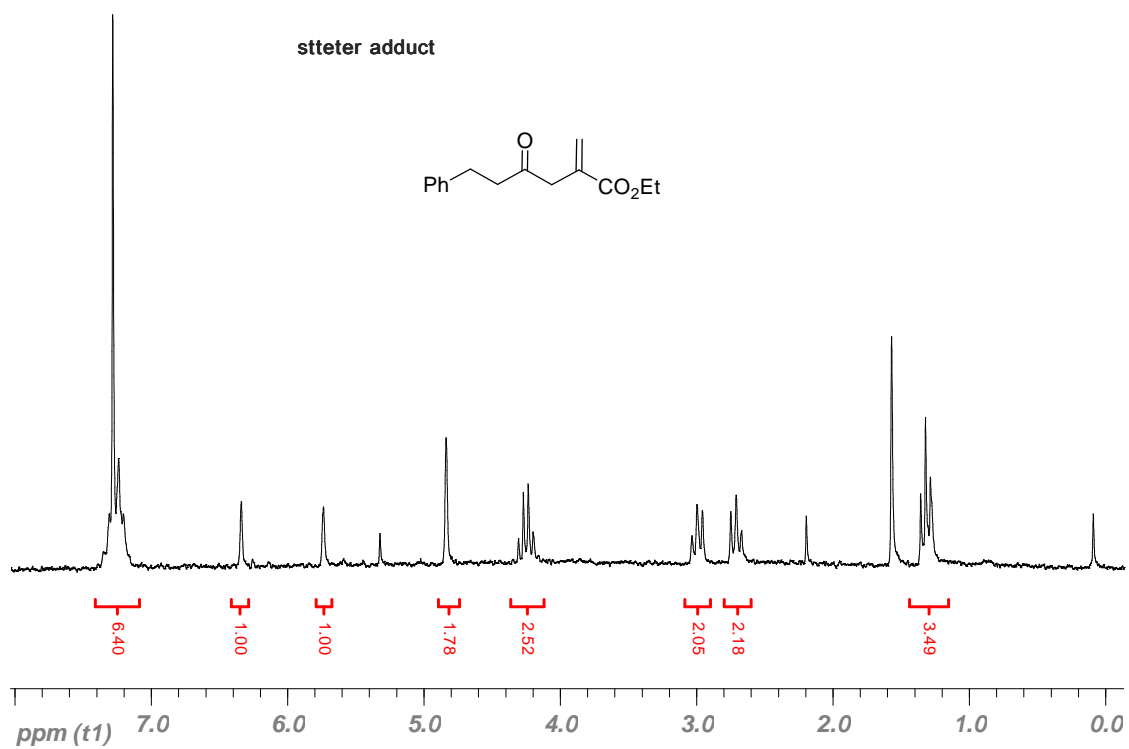

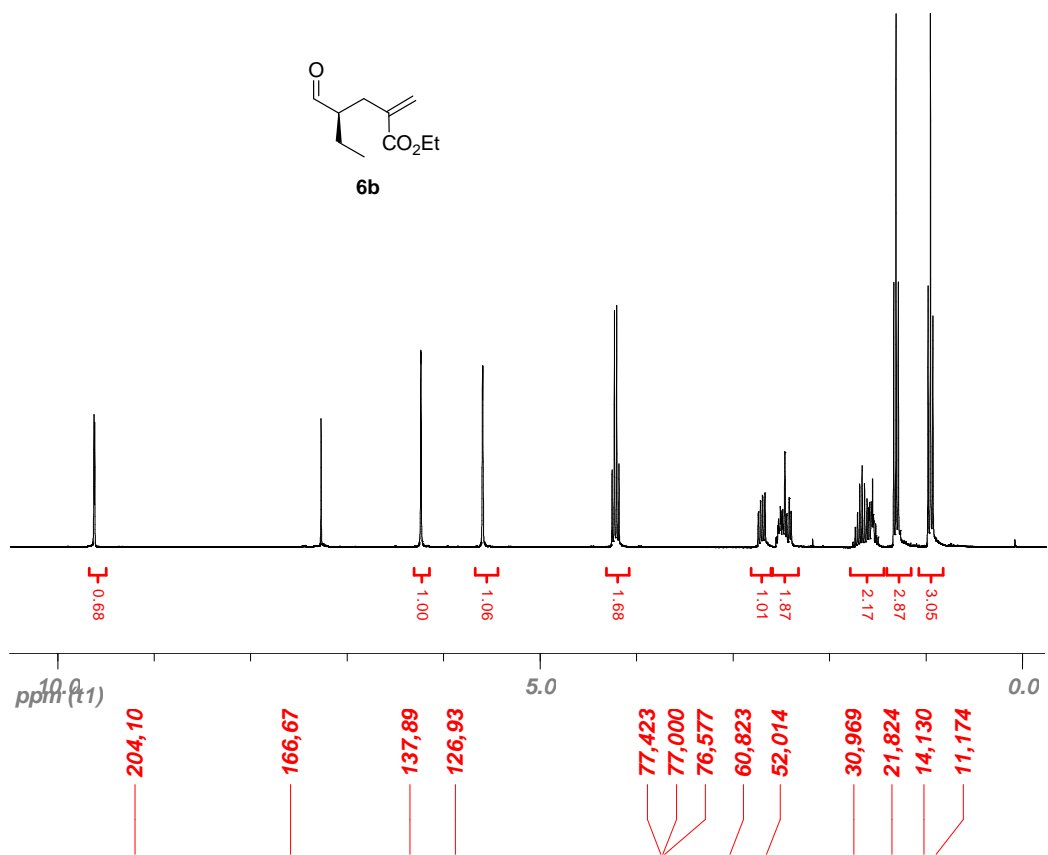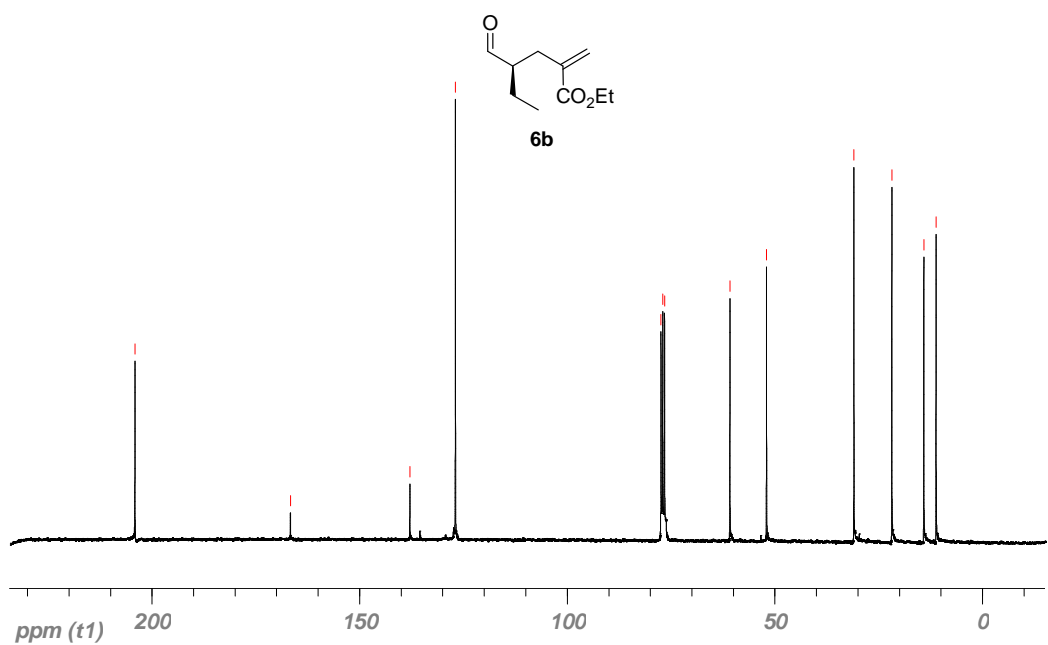

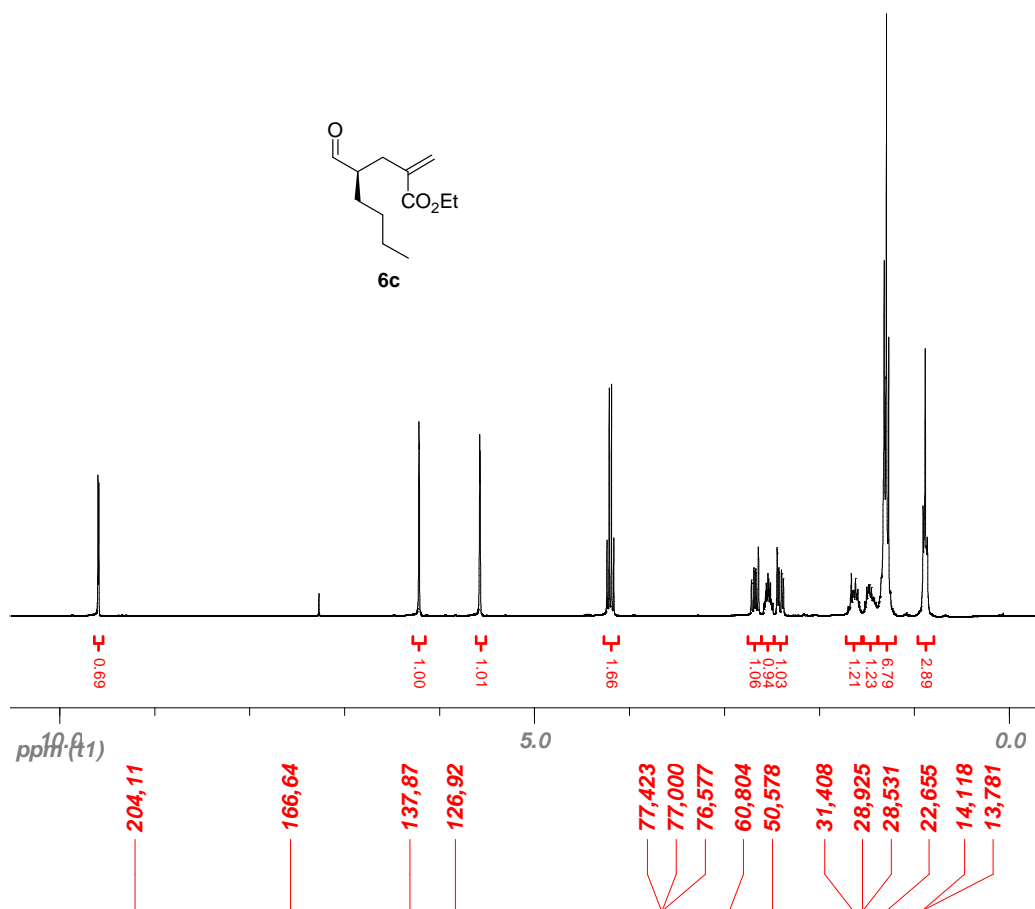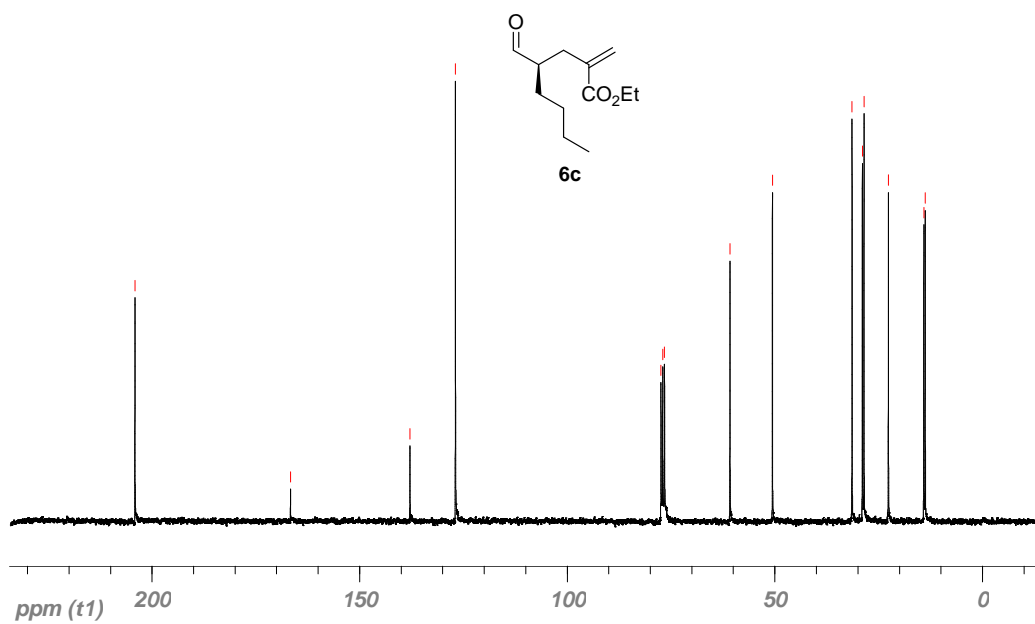

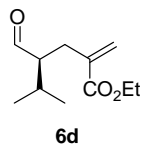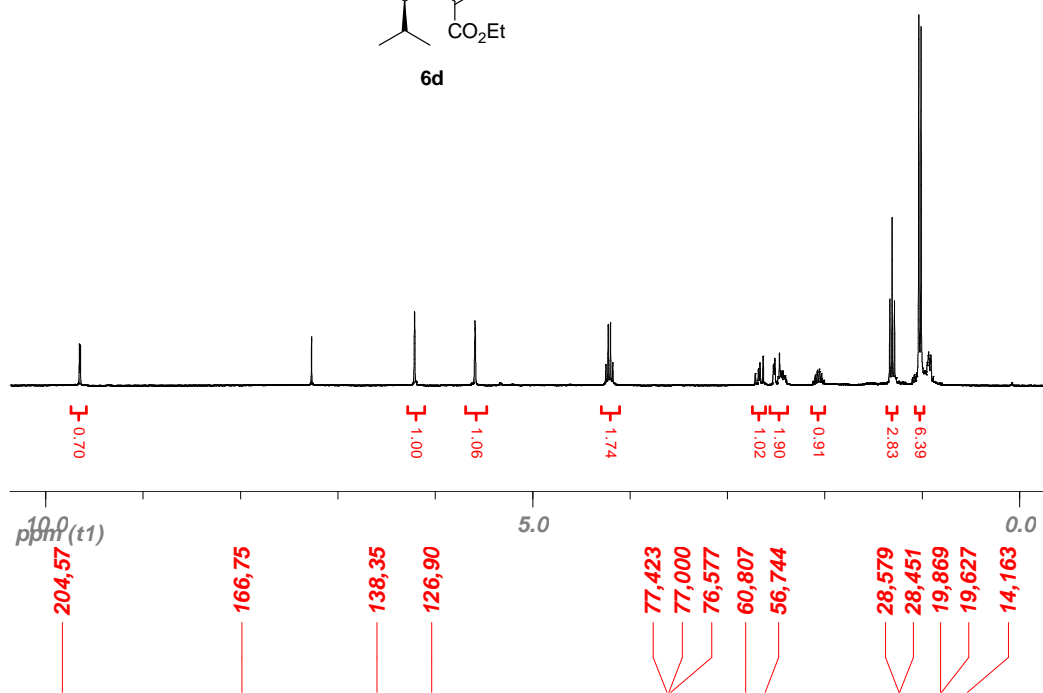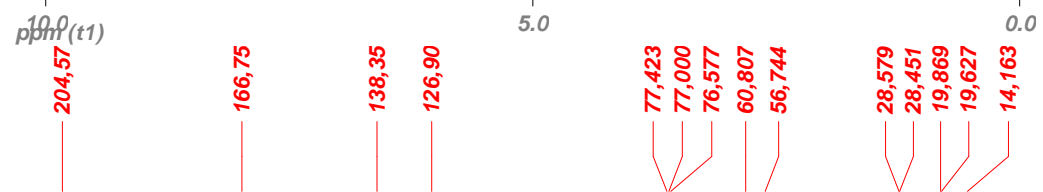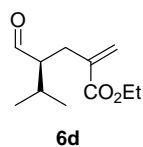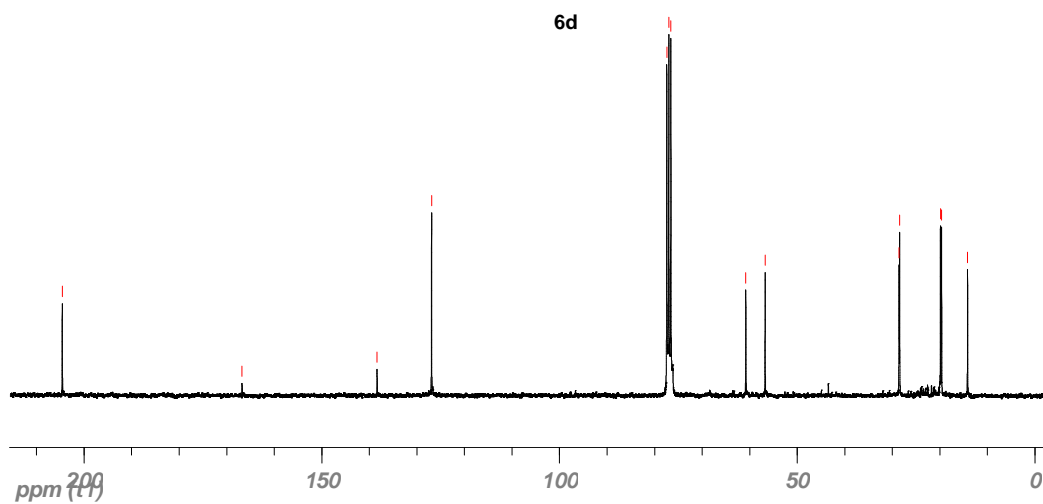

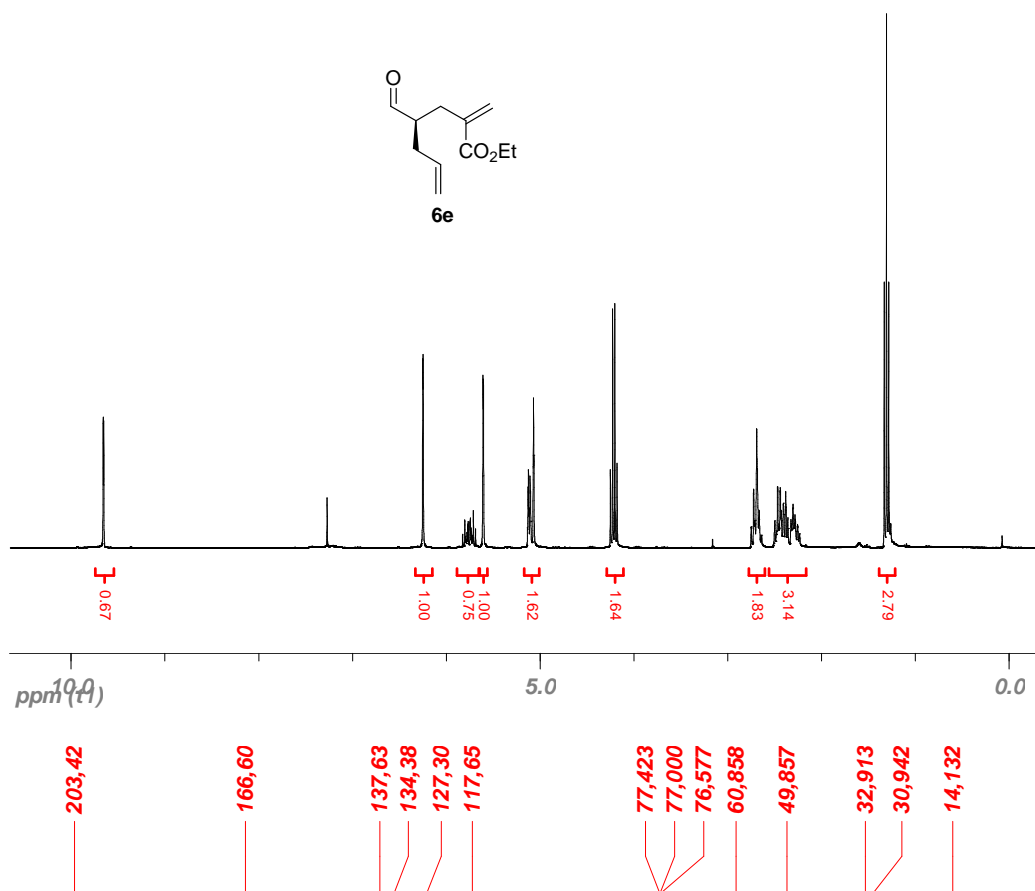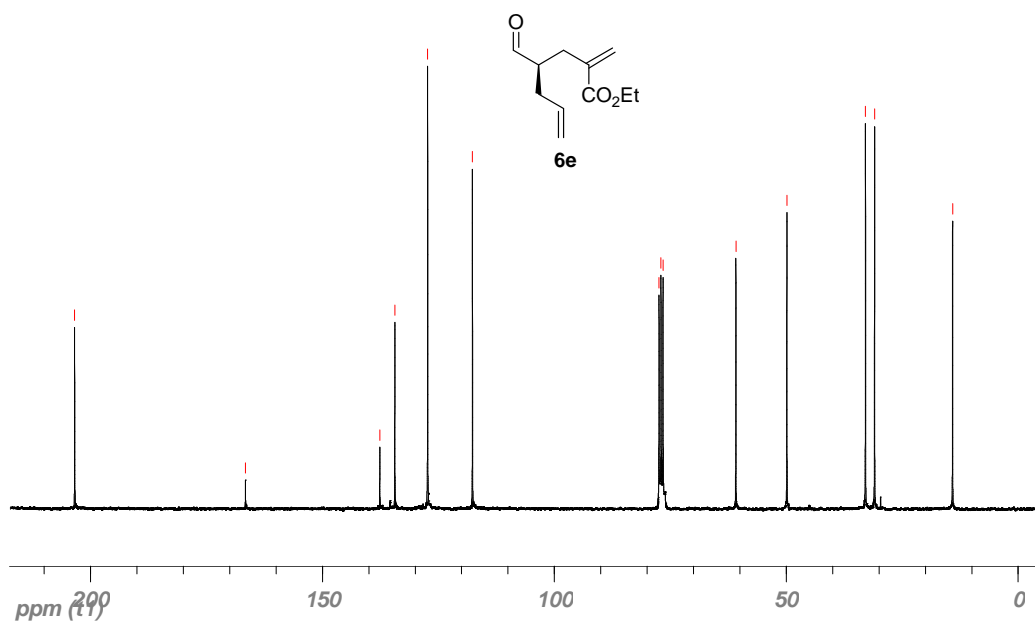

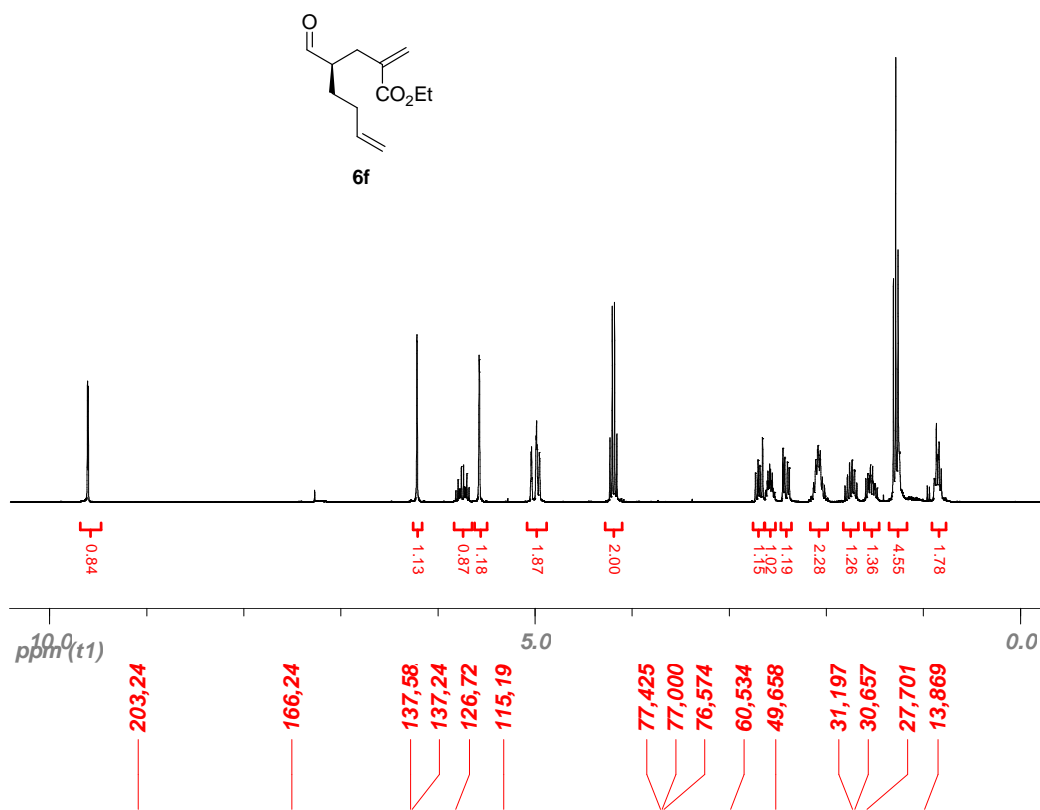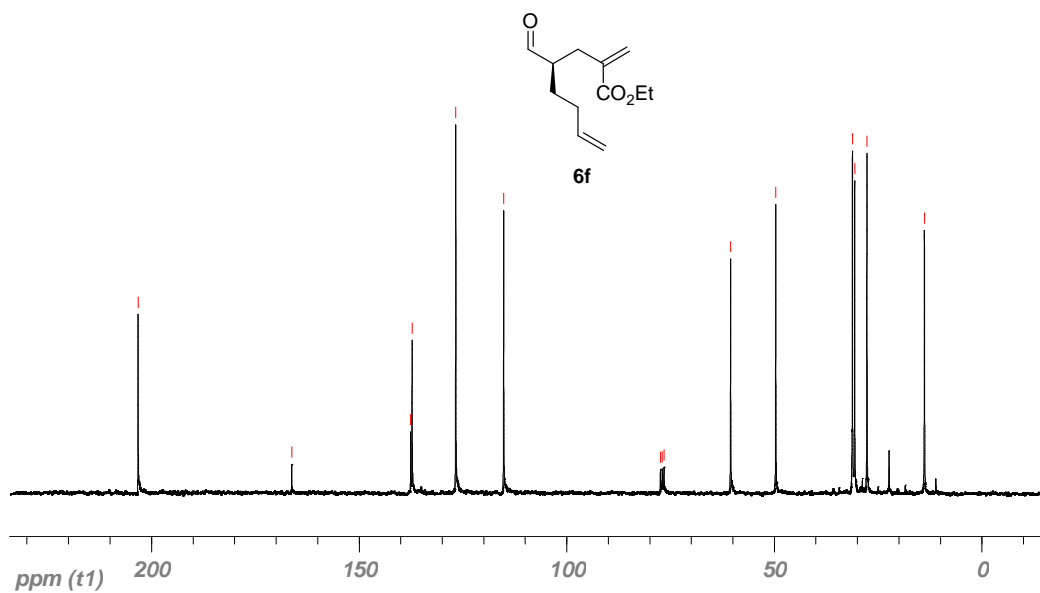



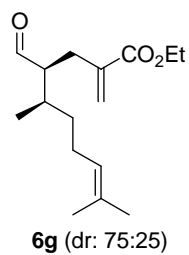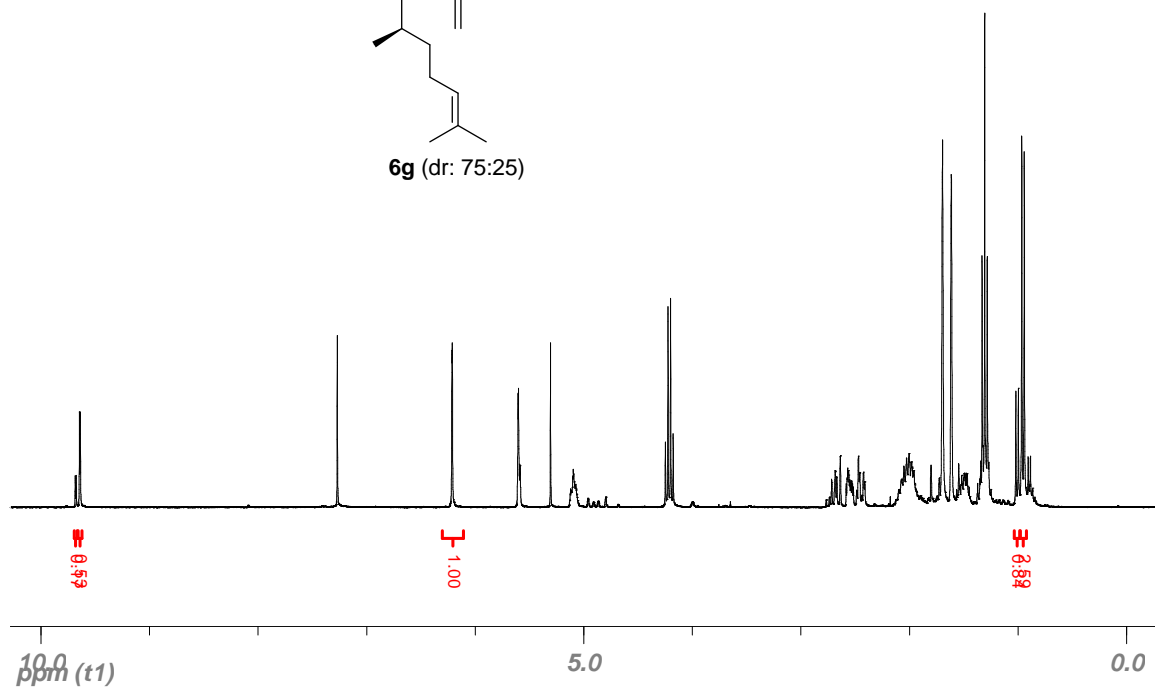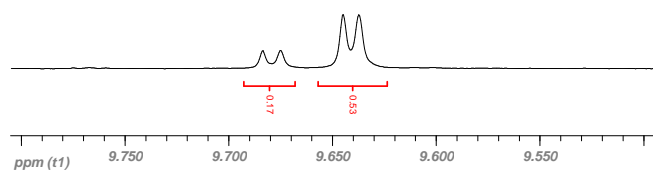

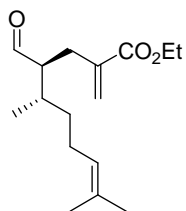

**6h** (dr: 97:3)

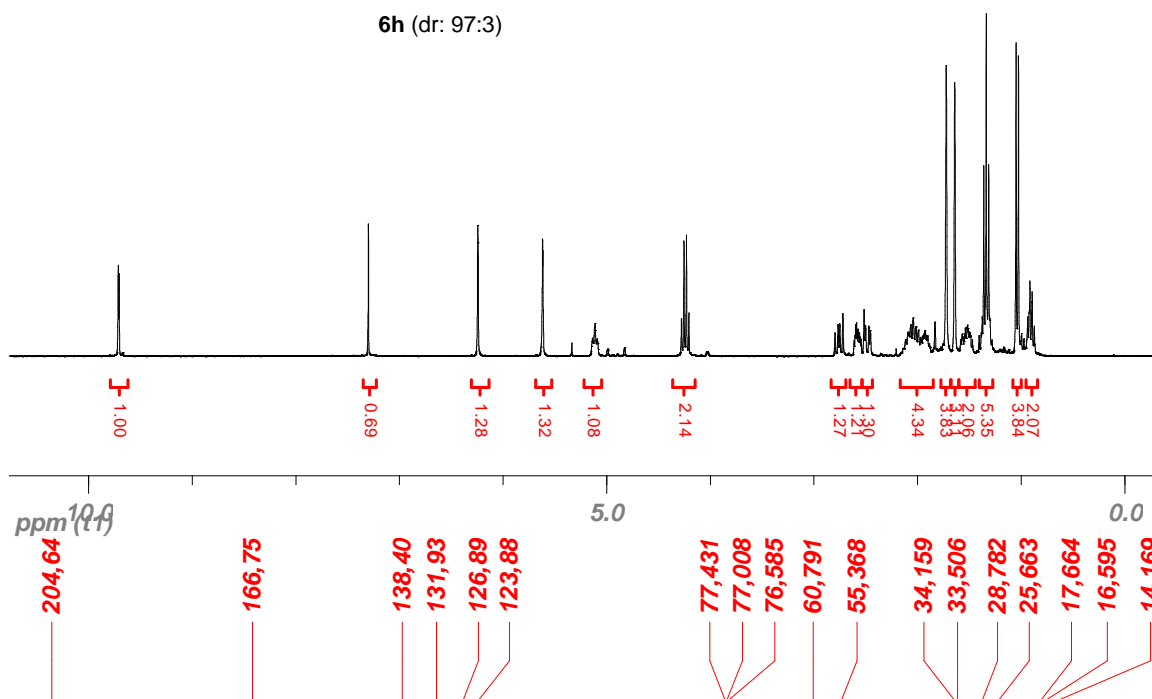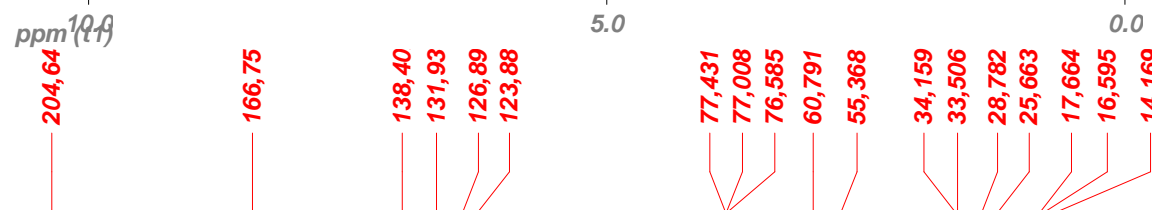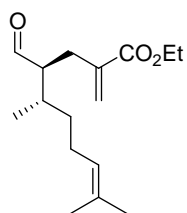

**6h** (dr: 97:3)

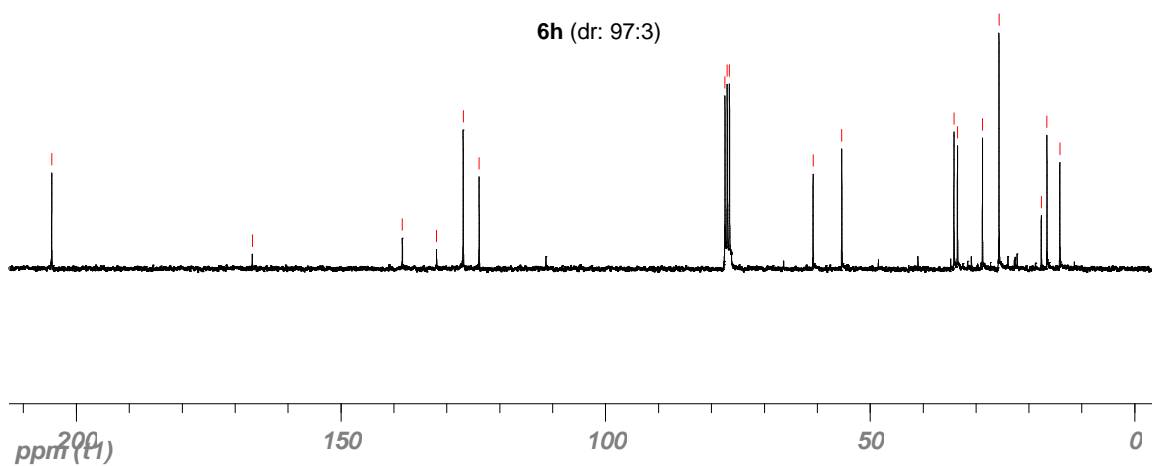

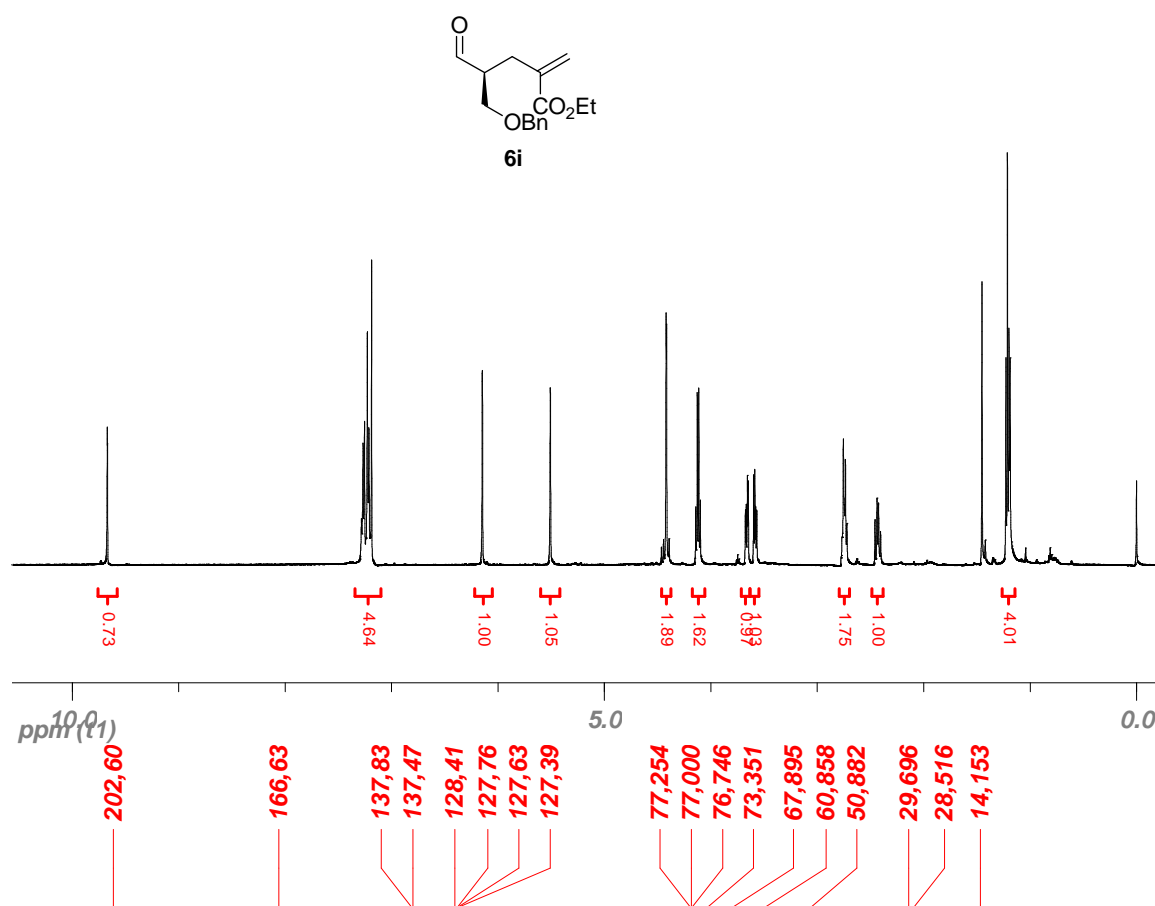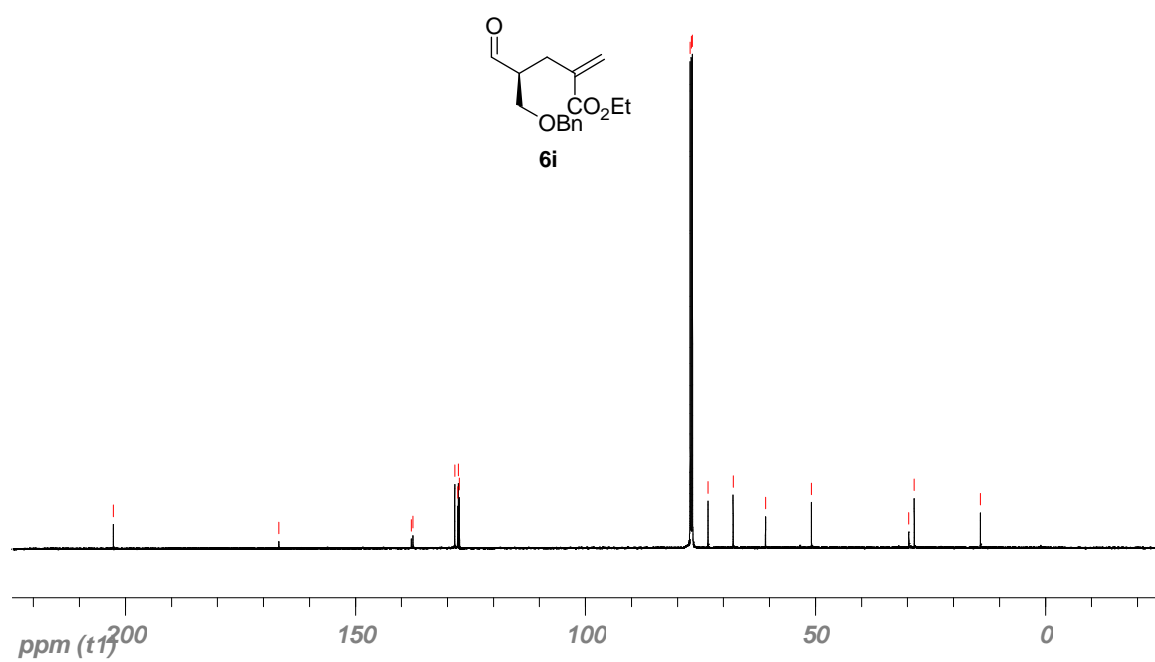

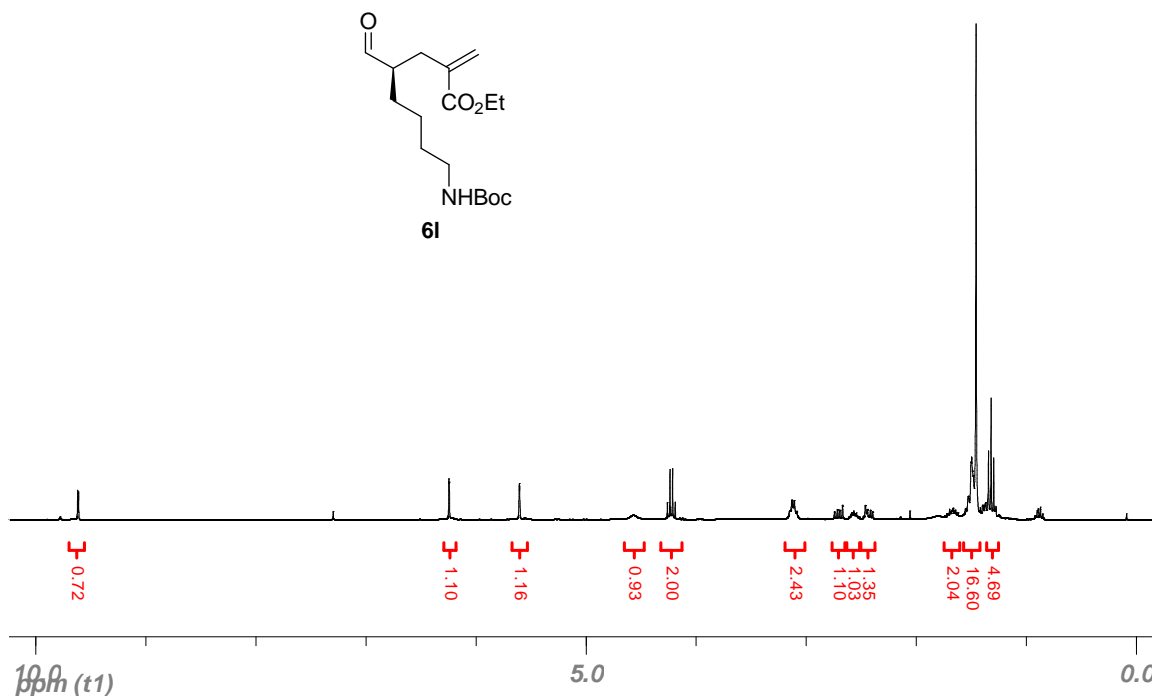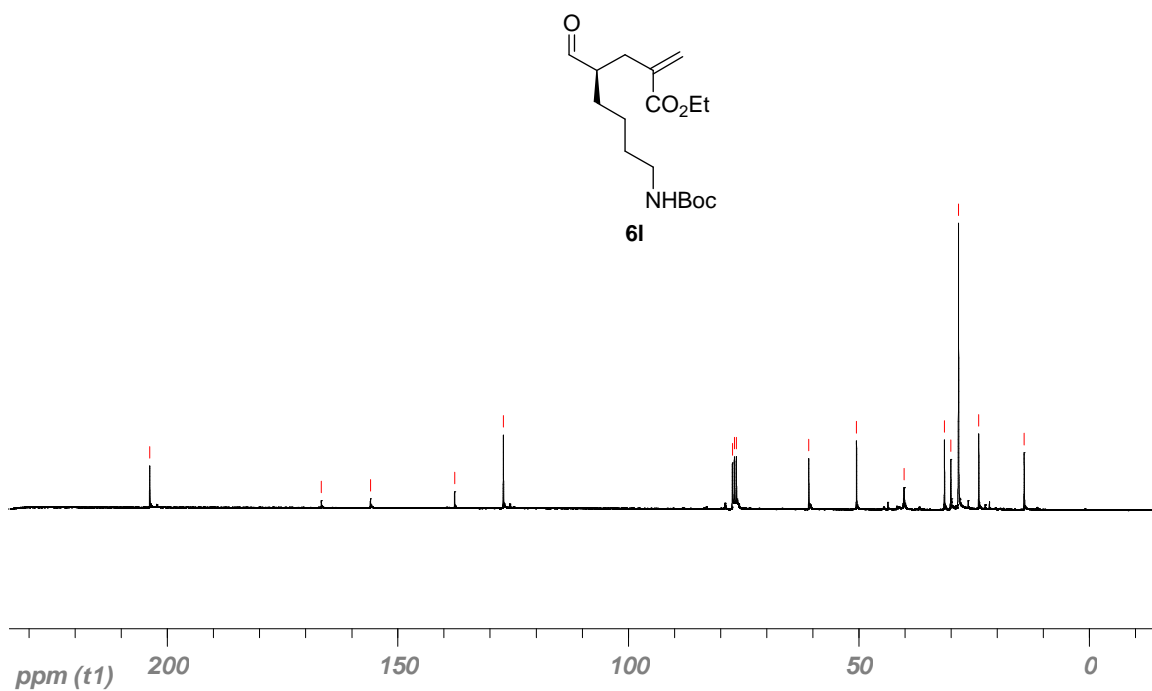

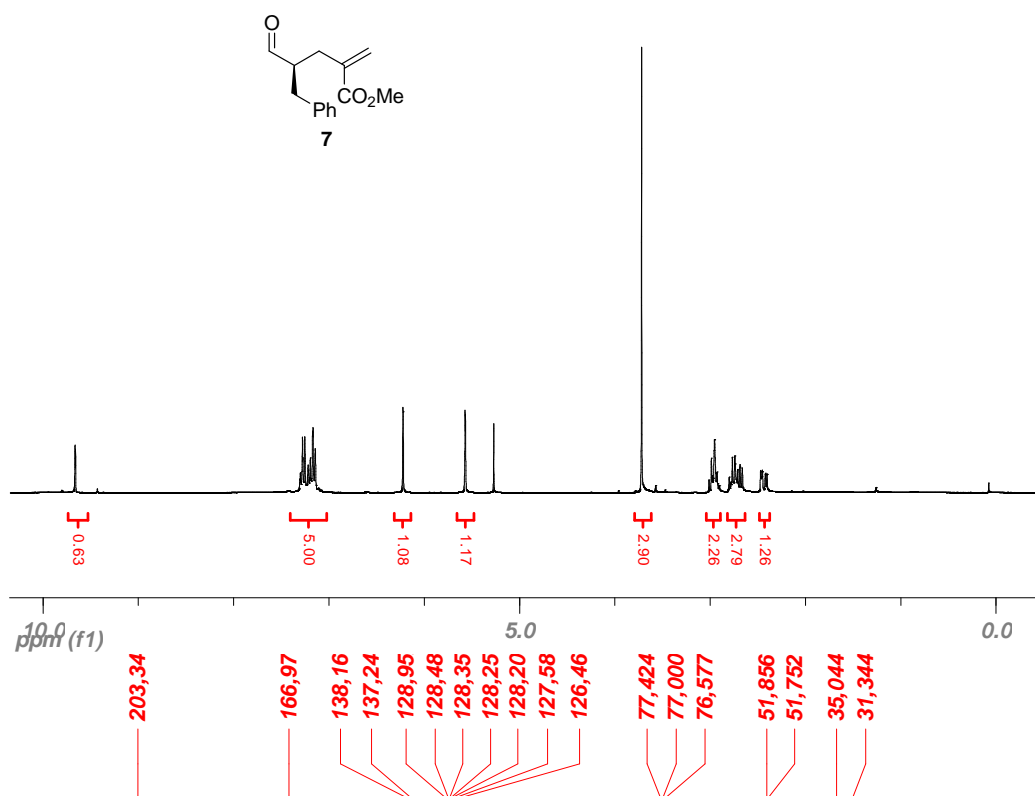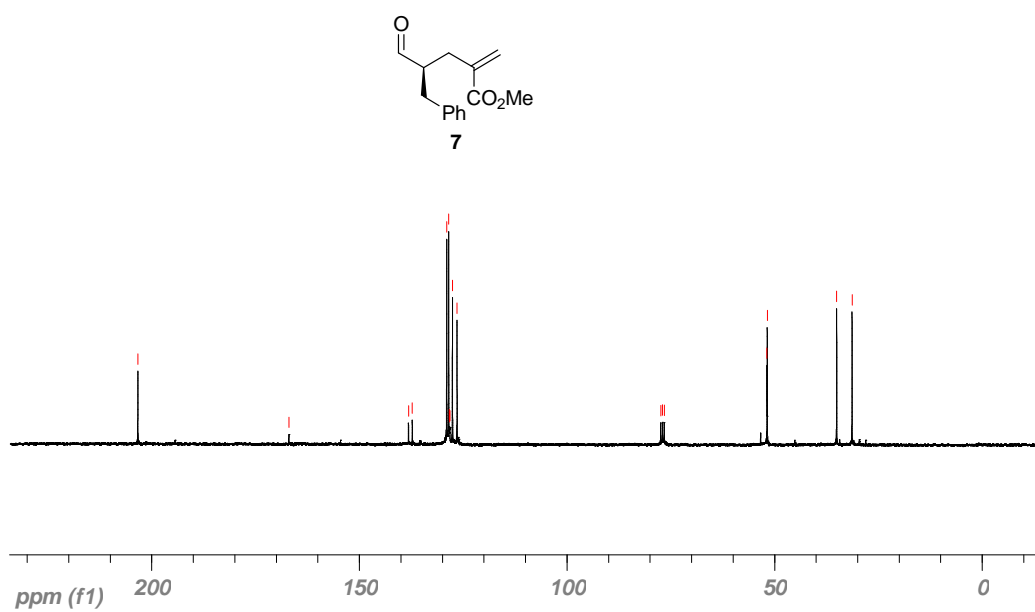

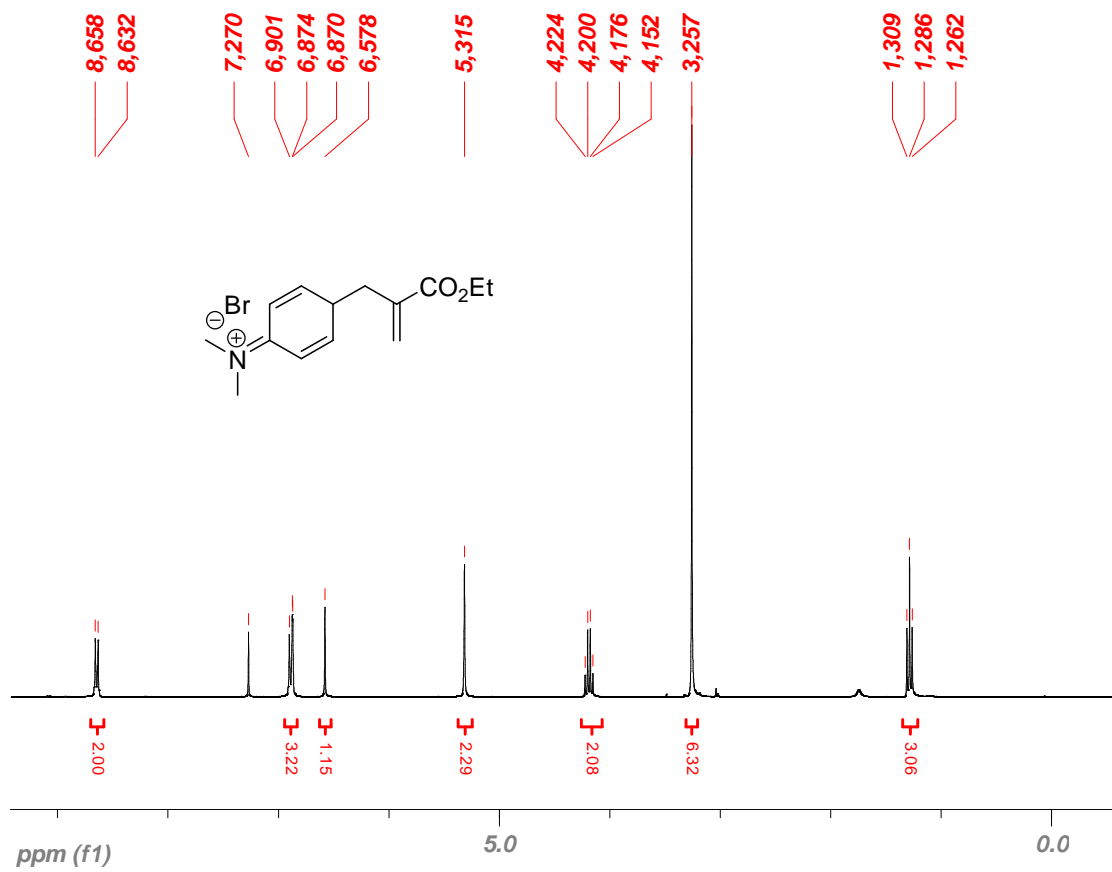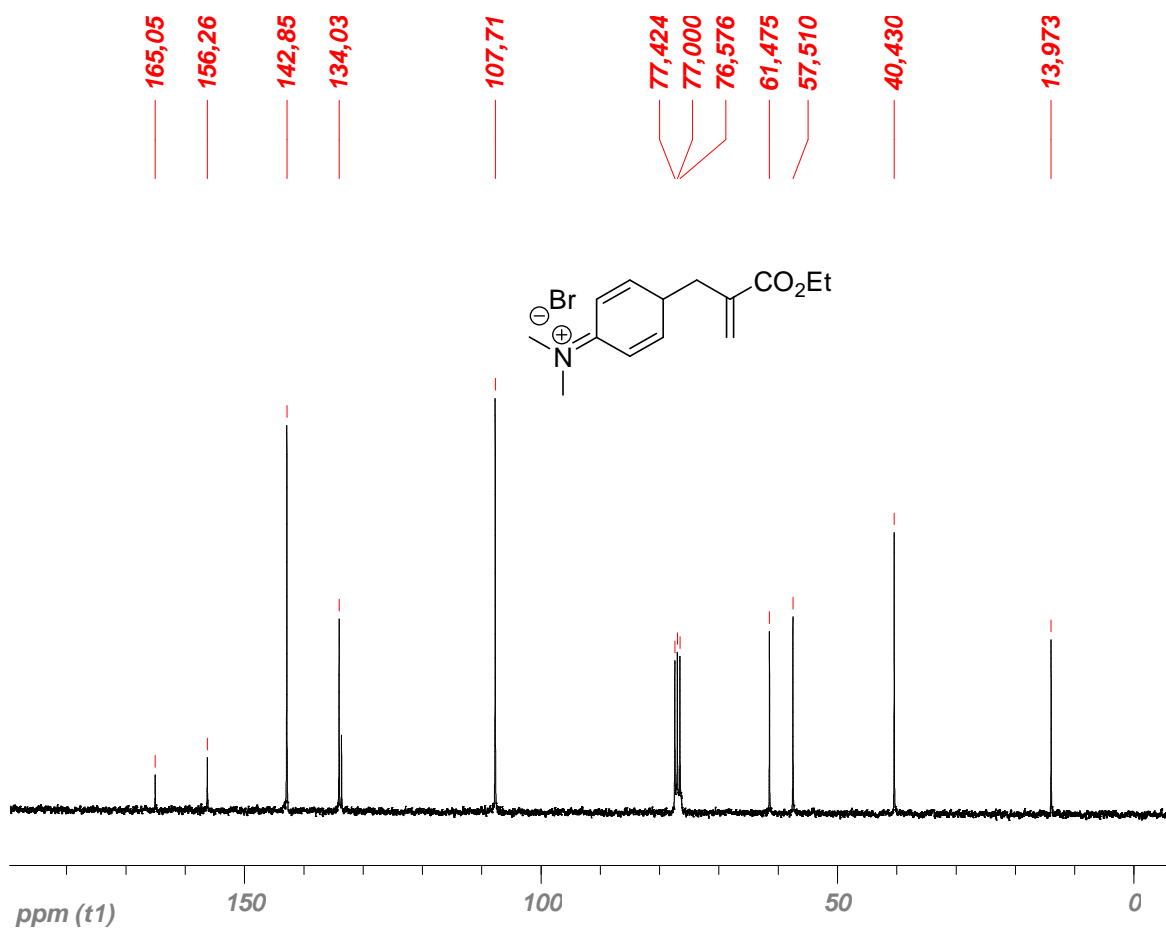

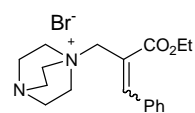

85:15 E/Z mixture

Aliquot sample from reaction mixture (DABCO + compound 14) after 30 minutes at room temperature

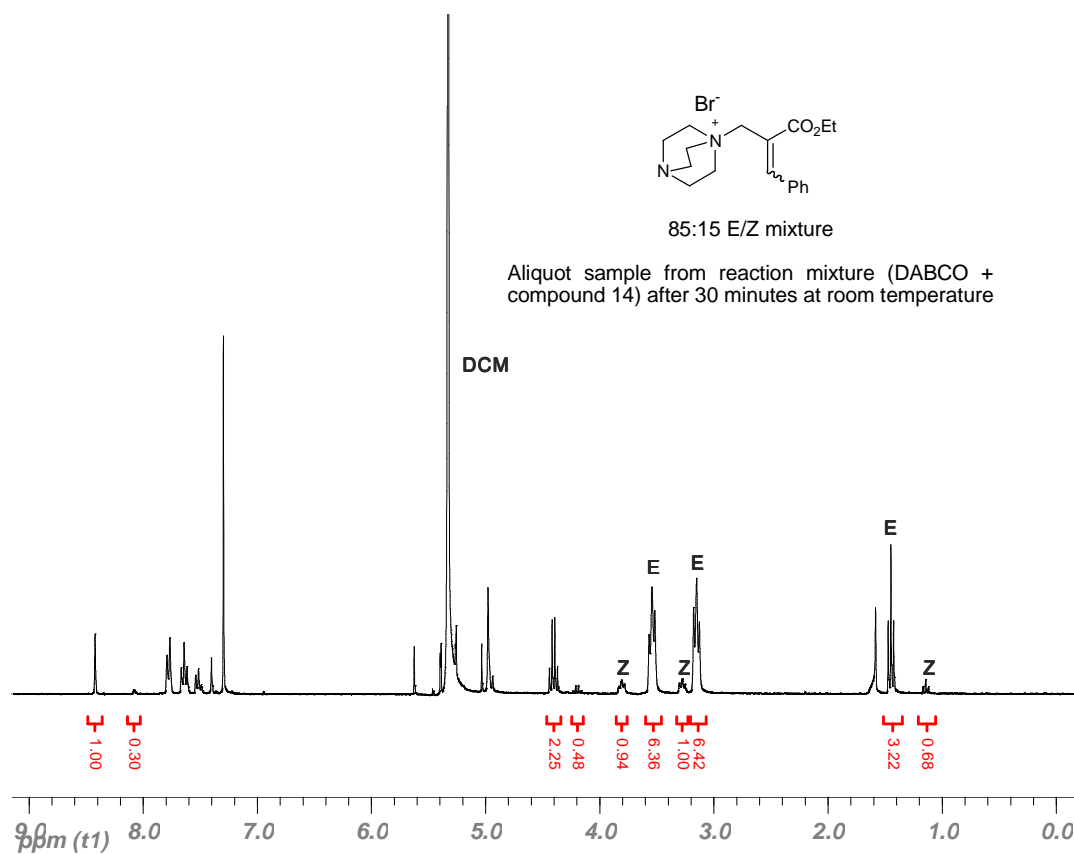

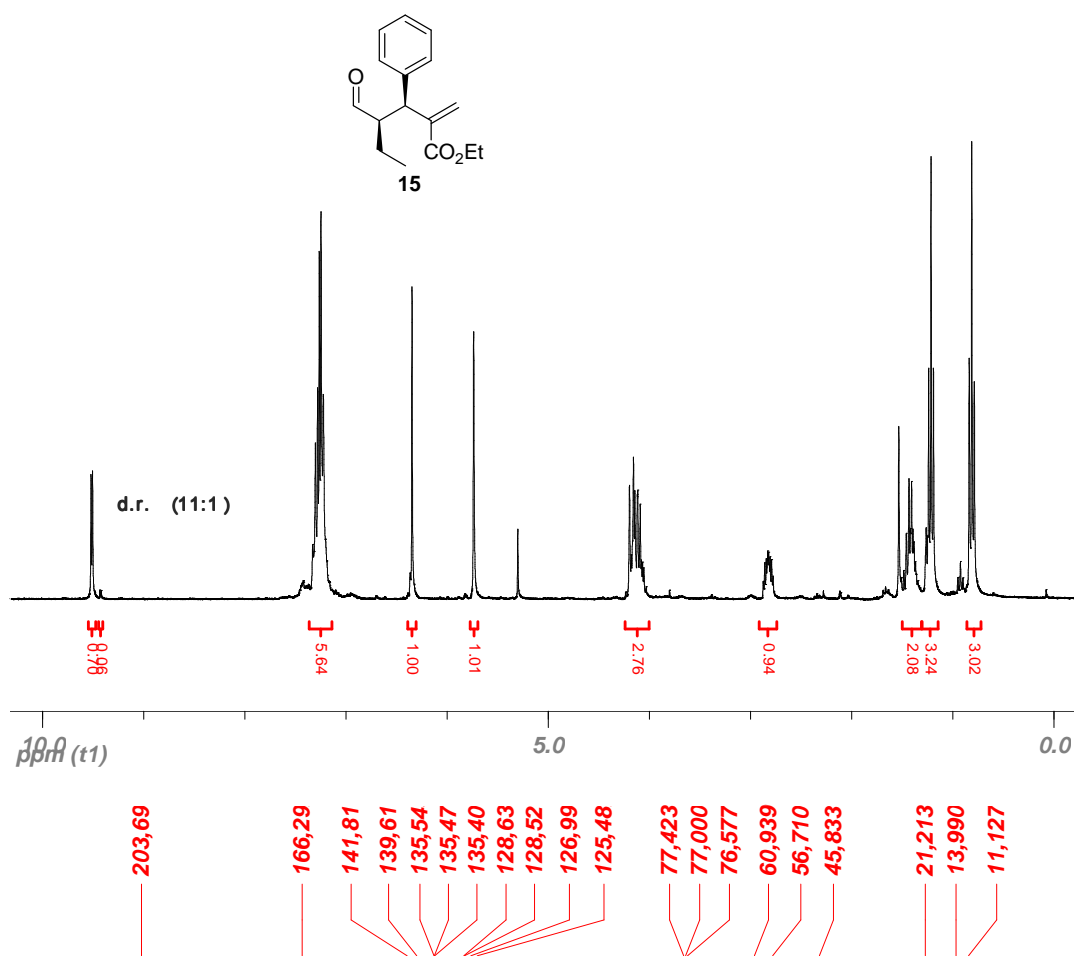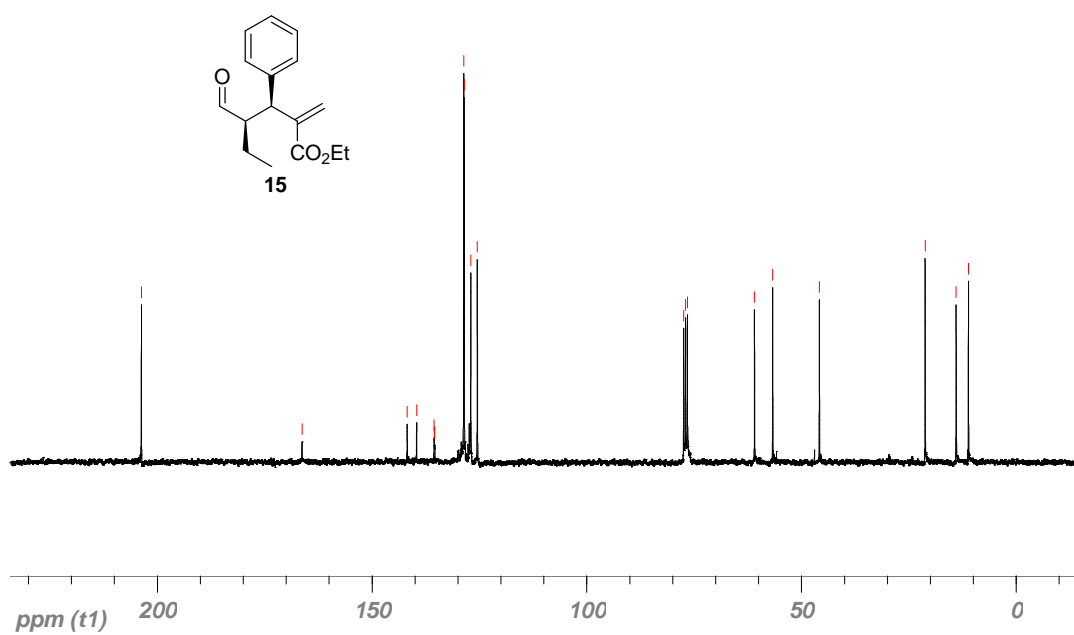



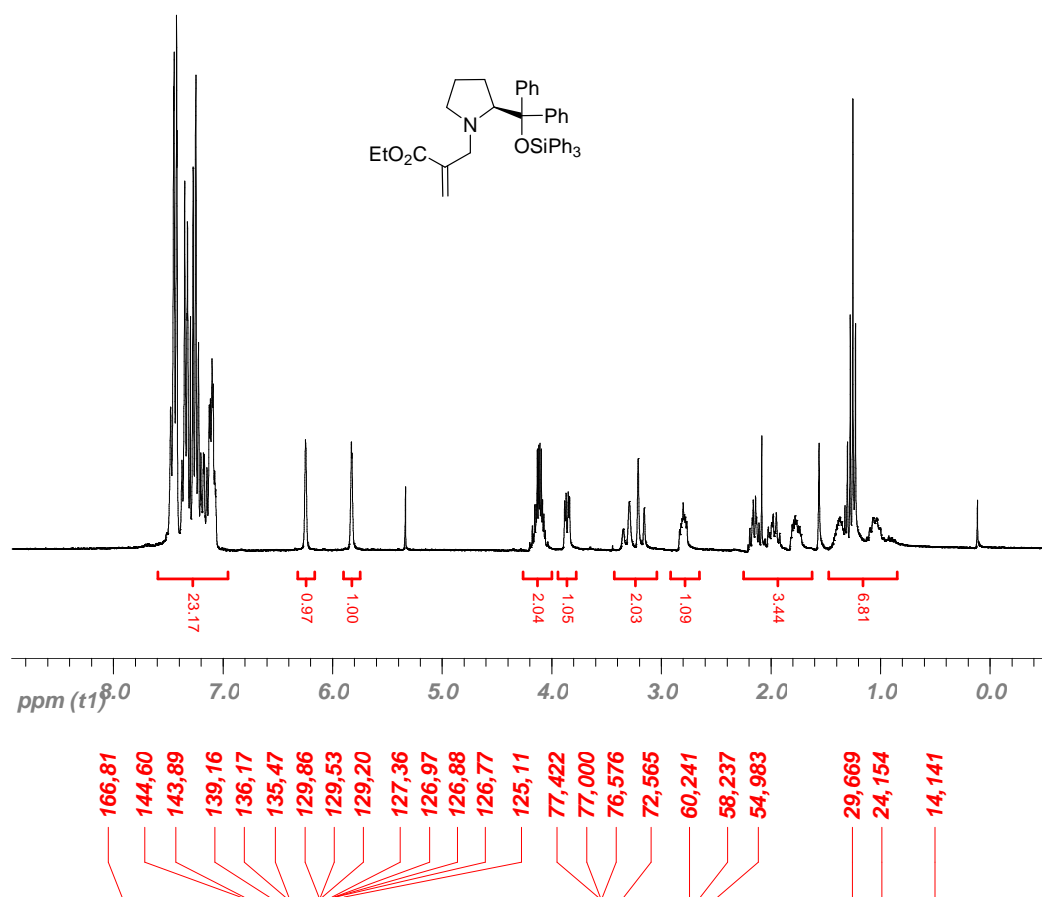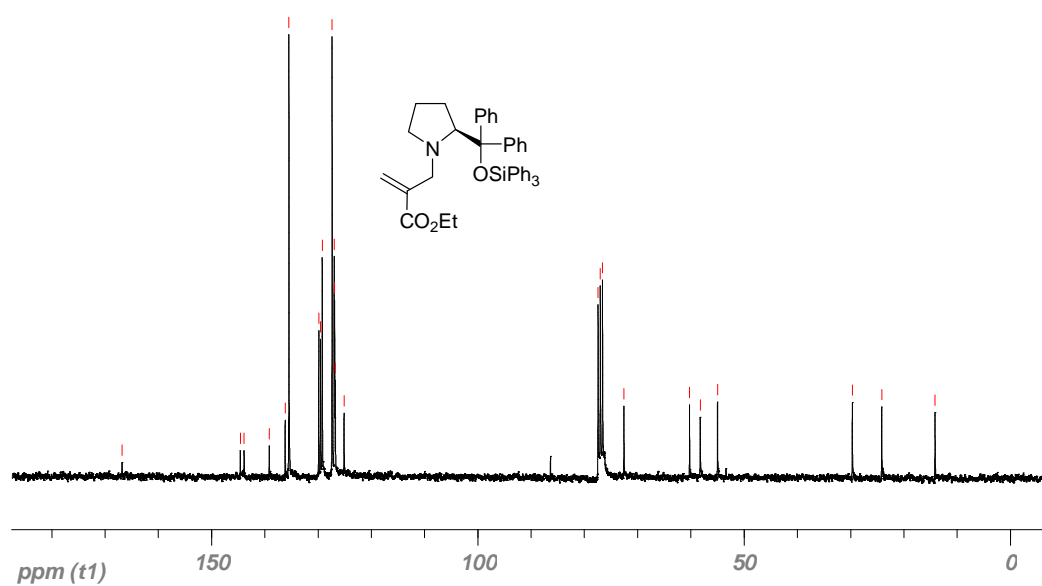

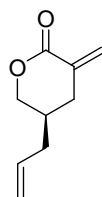

10

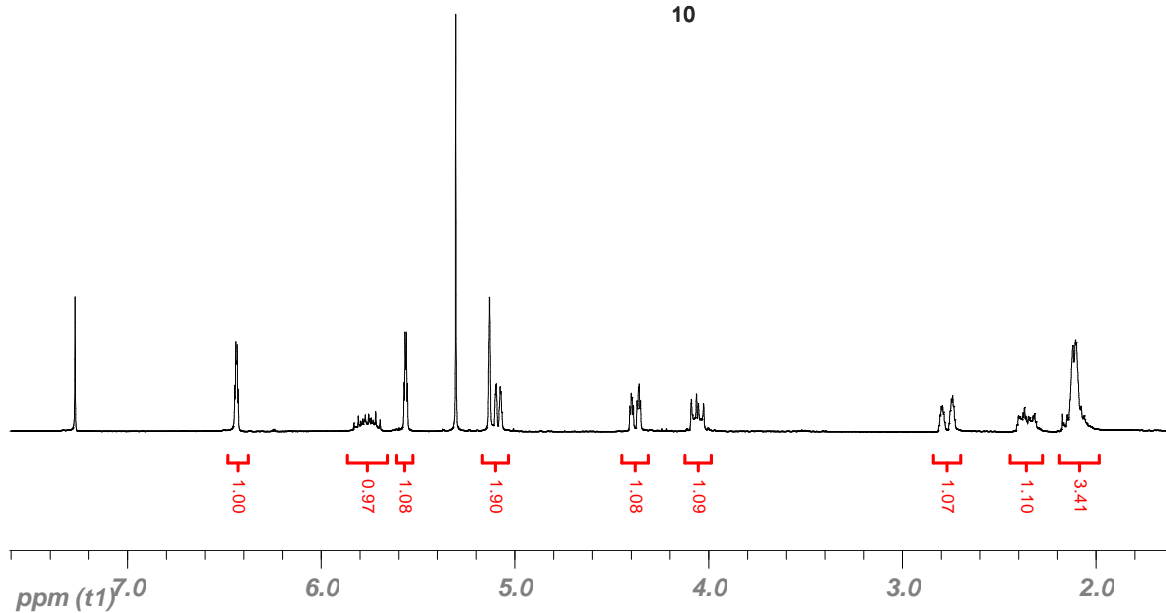

3,606  
3,575

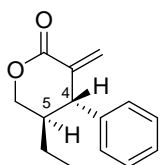

J (H-4-H-5) = 9.3Hz

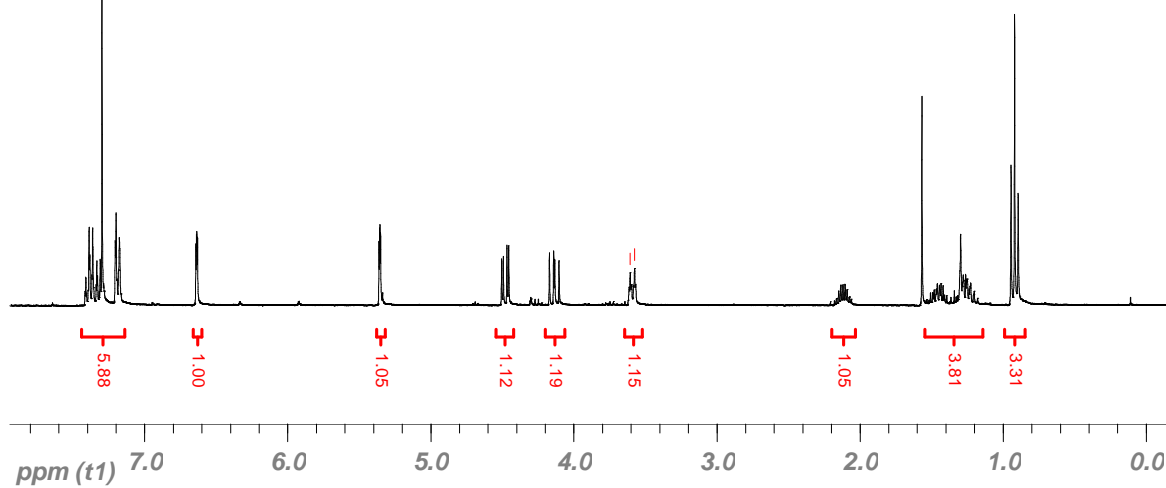

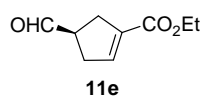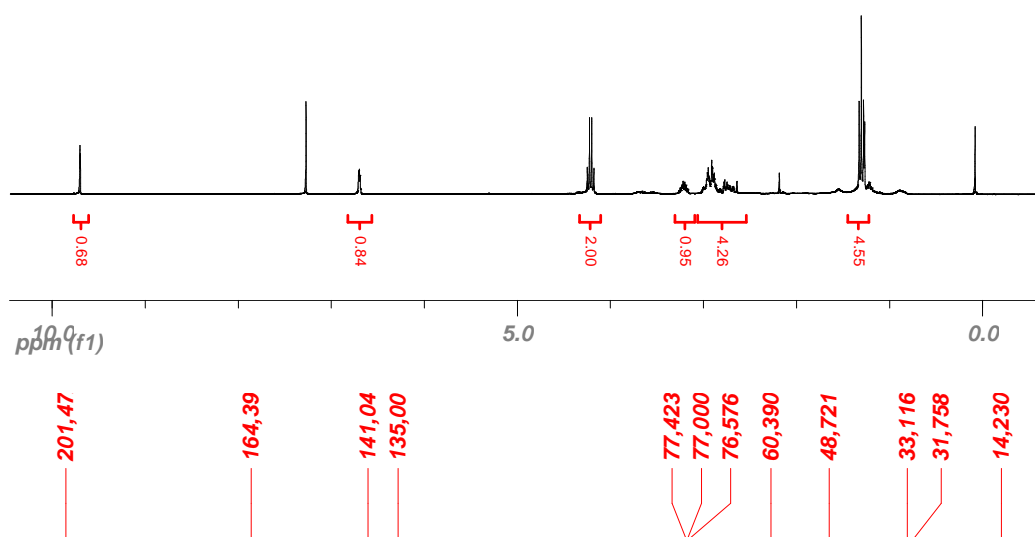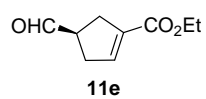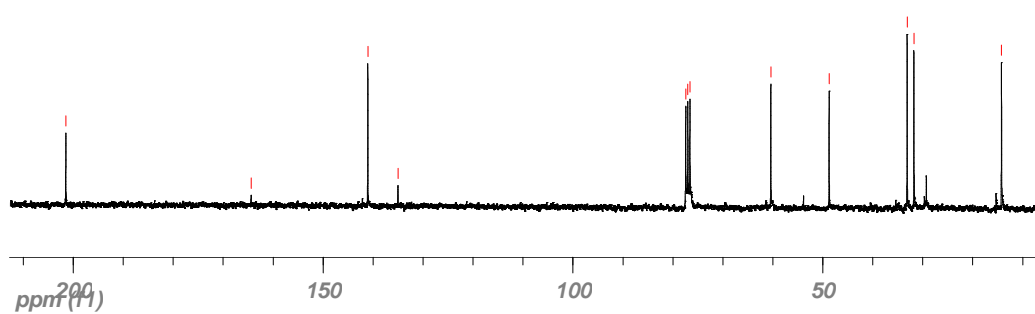

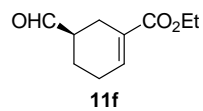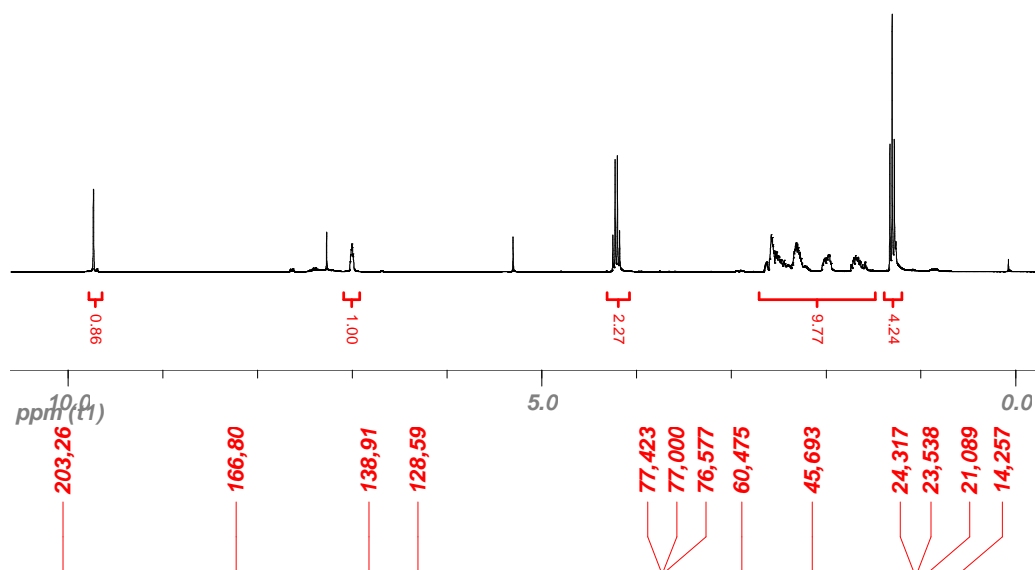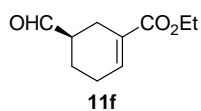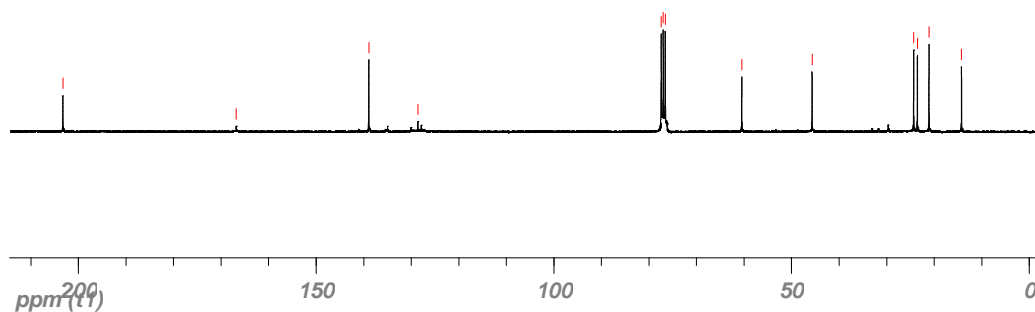

## 5. HPLC of compounds

Chiralpak IC, 90:10 hexane:*i*PrOH, 0.5mL/min,  $\lambda=210\text{nm}$

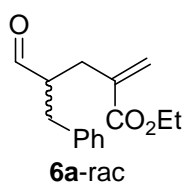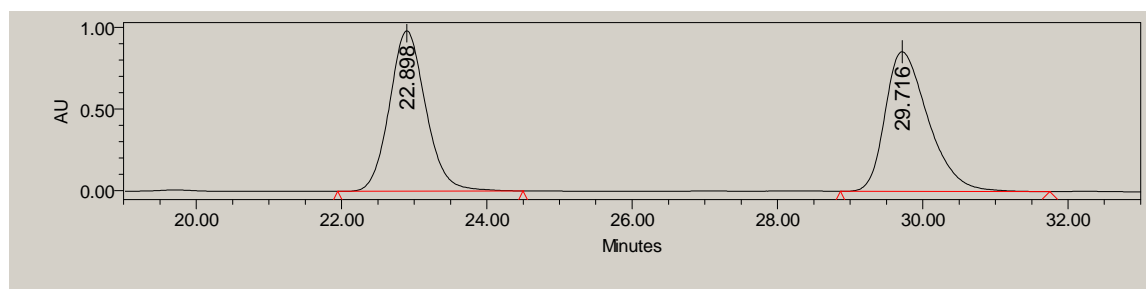

|   | Retention Time | % Area |
|---|----------------|--------|
| 1 | 22.898         | 49.10  |
| 2 | 29.716         | 50.90  |

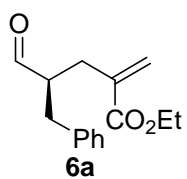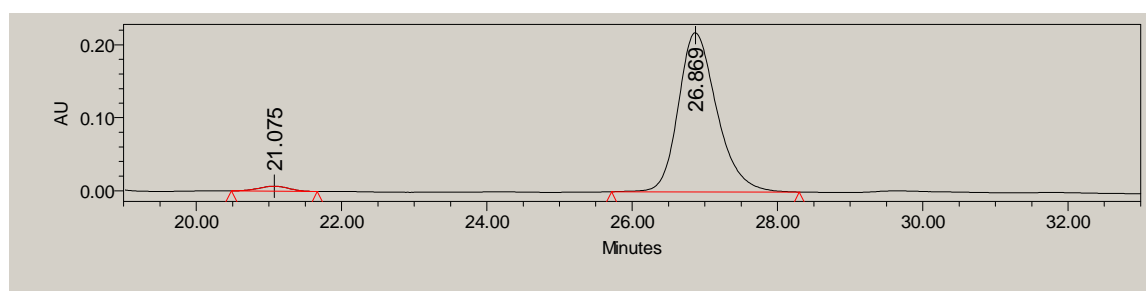

|   | Retention Time | % Area |
|---|----------------|--------|
| 2 | 26.869         | 96.53  |
| 1 | 21.070         | 3.47   |

Chiralpak IC, 95:5 hexane:*i*PrOH, 0.5mL/min,  $\lambda=210\text{nm}$

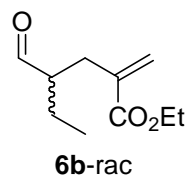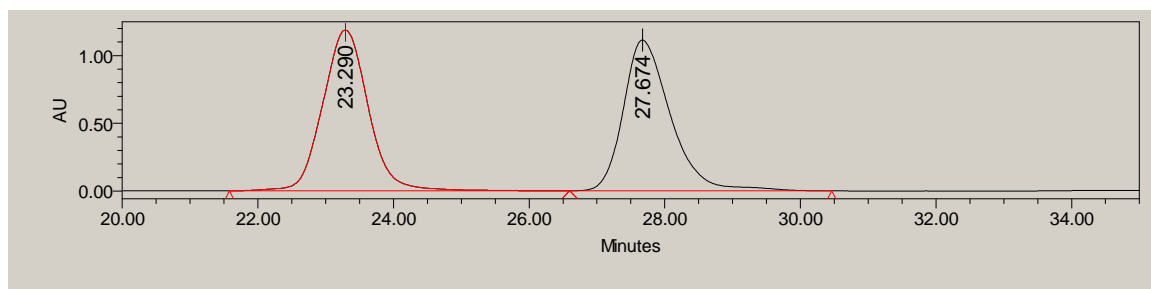

|   | Retention Time | % Area |
|---|----------------|--------|
| 1 | 23.290         | 50.68  |
| 2 | 27.674         | 49.32  |

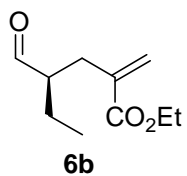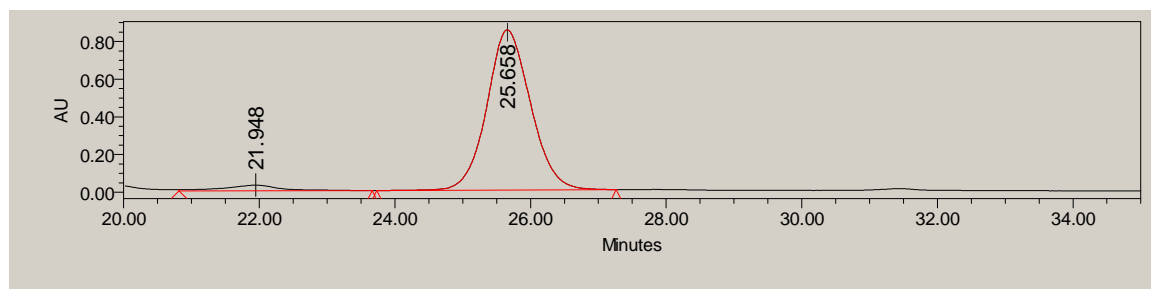

|   | Retention Time | % Area |
|---|----------------|--------|
| 2 | 25.658         | 95.72  |
| 1 | 21.948         | 4.28   |

Chiralpak IC, 90:10 hexane:*i*PrOH, 0.5mL/min,  $\lambda=216\text{nm}$

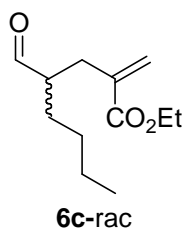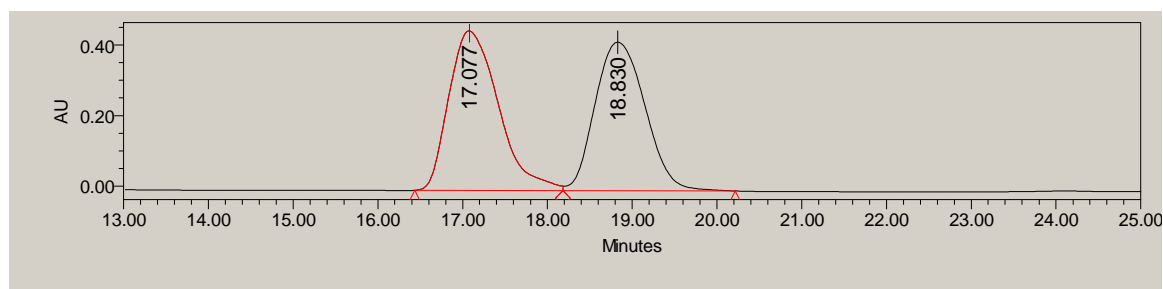

|   | Retention Time | % Area |
|---|----------------|--------|
| 1 | 17.077         | 51.58  |
| 2 | 18.830         | 48.42  |

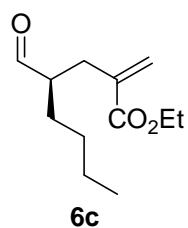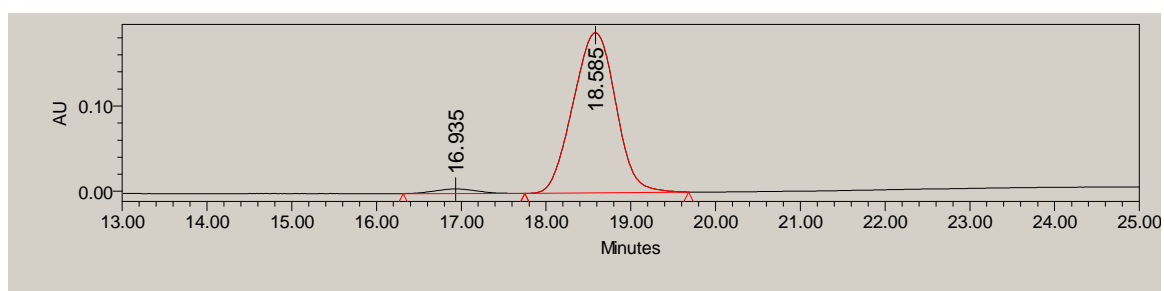

|   | Retention Time | % Area |
|---|----------------|--------|
| 2 | 18.585         | 97.35  |
| 1 | 16.935         | 2.65   |

Chiralpak IC, 95:5 hexane:*i*PrOH, 0.5mL/min,  $\lambda=210\text{nm}$

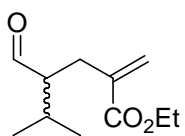

**6d-rac**

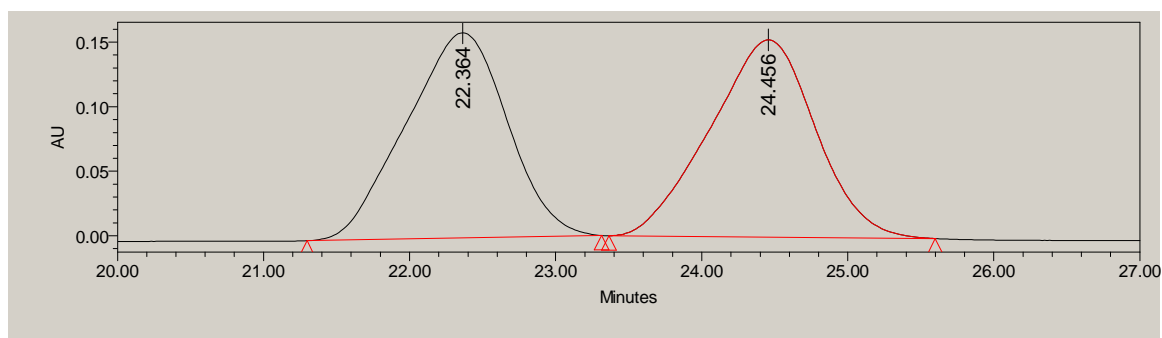

|   | Retention Time | % Area |
|---|----------------|--------|
| 1 | 22.364         | 49.96  |
| 2 | 24.456         | 50.04  |

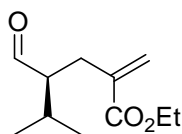

**6d**

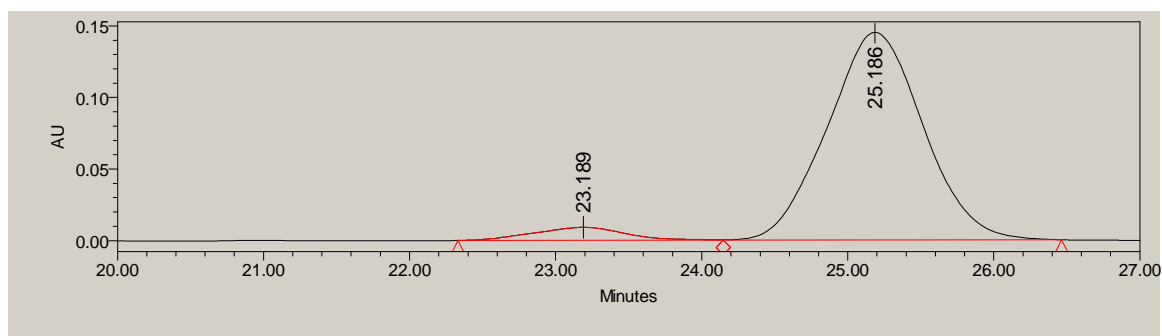

|   | Retention Time | % Area |
|---|----------------|--------|
| 1 | 23.189         | 5.70   |
| 2 | 25.186         | 94.30  |



Chiralpak IC, 95:5 hexane:*i*PrOH, 0.5mL/min,  $\lambda=212\text{nm}$

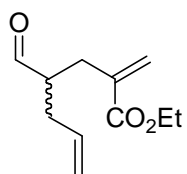

**6e-rac**

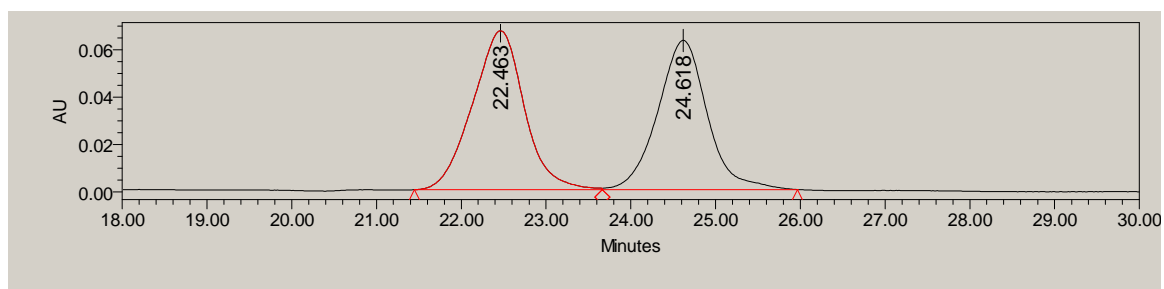

|   | Retention Time | % Area |
|---|----------------|--------|
| 1 | 22.463         | 52.72  |
| 2 | 24.618         | 47.28  |

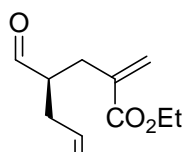

**6e**

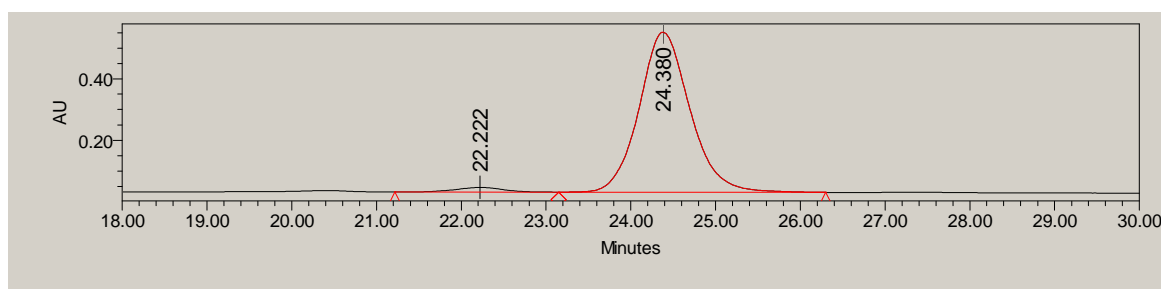

|   | Retention Time | % Area |
|---|----------------|--------|
| 2 | 24.380         | 97.32  |
| 1 | 22.222         | 2.68   |

Chiralpak IC, 99:1 hexane:*i*PrOH, 0.5mL/min,  $\lambda=210\text{nm}$

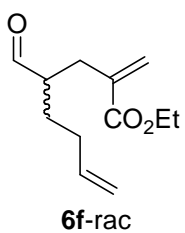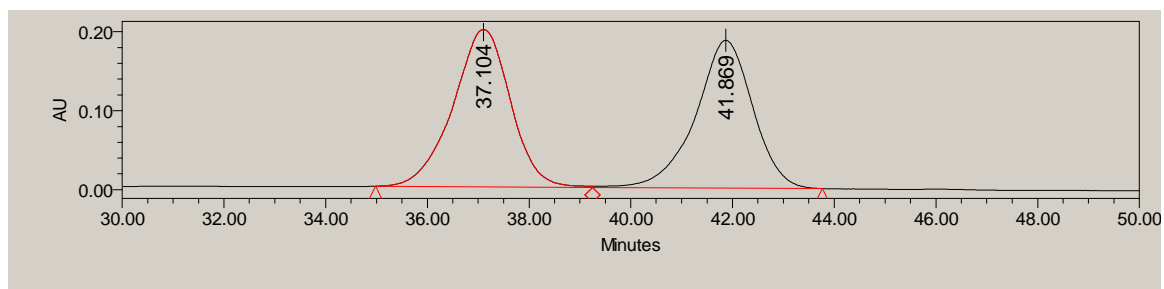

|   | Retention Time | % Area |
|---|----------------|--------|
| 1 | 37.104         | 51.61  |
| 2 | 41.869         | 48.39  |

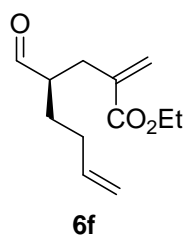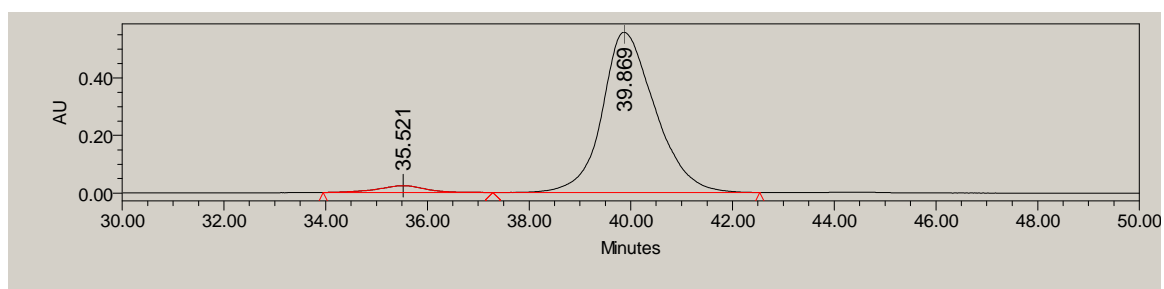

|   | Retention Time | % Area |
|---|----------------|--------|
| 1 | 35.521         | 3.60   |
| 2 | 39.869         | 96.40  |

Chiralpak IC, 95:5 hexane:*i*PrOH, 0.5mL/min,  $\lambda=210\text{nm}$

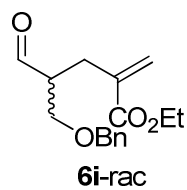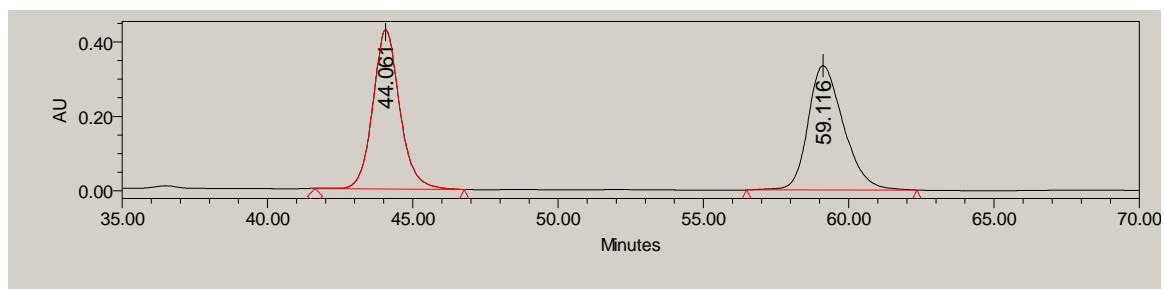

|   | Retention Time | % Area |
|---|----------------|--------|
| 1 | 44.061         | 49.32  |
| 2 | 59.116         | 50.68  |

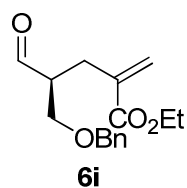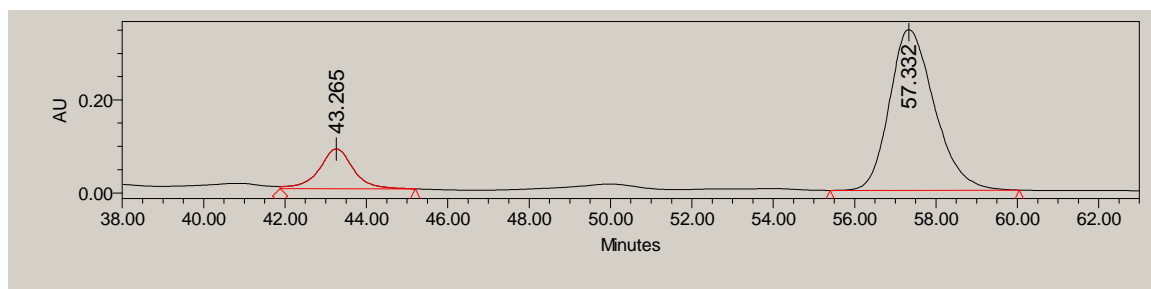

|   | Retention Time | % Area |
|---|----------------|--------|
| 1 | 43.265         | 15.94  |
| 2 | 57.332         | 84.06  |

Chiralpak IC, 80:20 hexane:*i*PrOH, 0.5mL/min,  $\lambda=210\text{nm}$

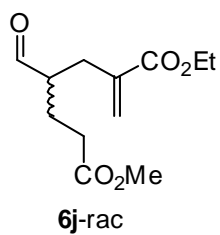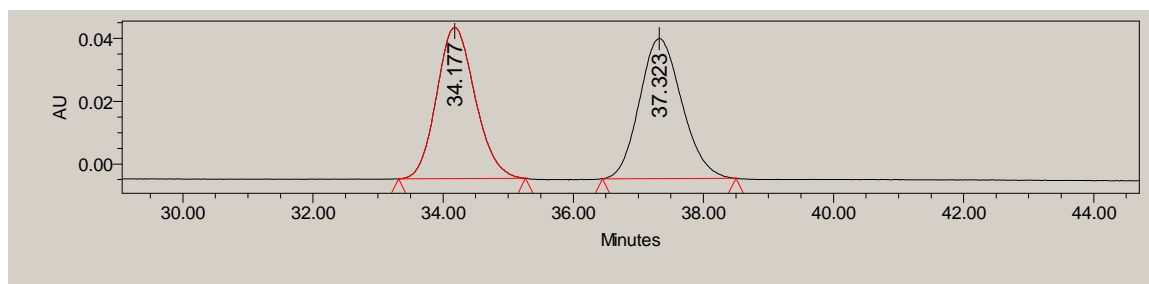

|   | Retention Time | % Area |
|---|----------------|--------|
| 1 | 34.177         | 49.50  |
| 2 | 37.323         | 50.50  |

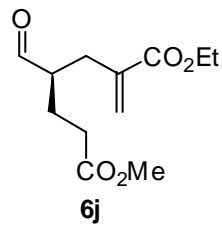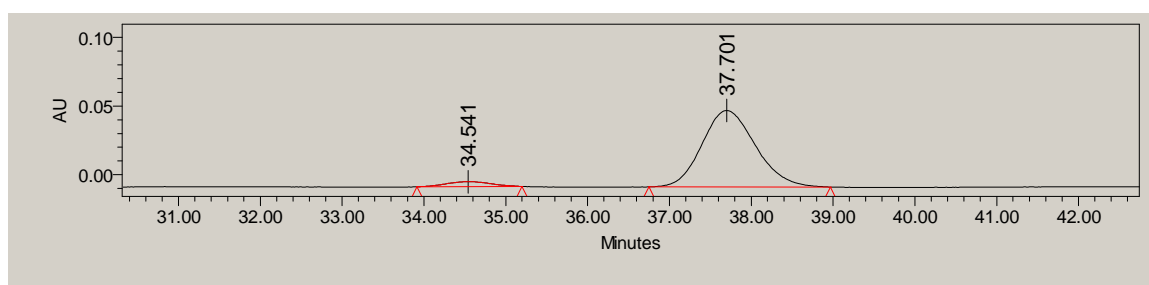

|   | Retention Time | % Area |
|---|----------------|--------|
| 1 | 34.541         | 5.09   |
| 2 | 37.701         | 94.91  |

Chiralpak IC, 80:20 hexane:*i*PrOH, 0.5mL/min,  $\lambda=210\text{nm}$

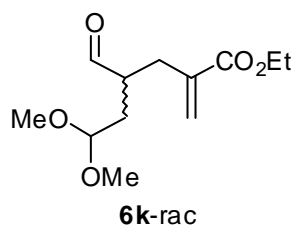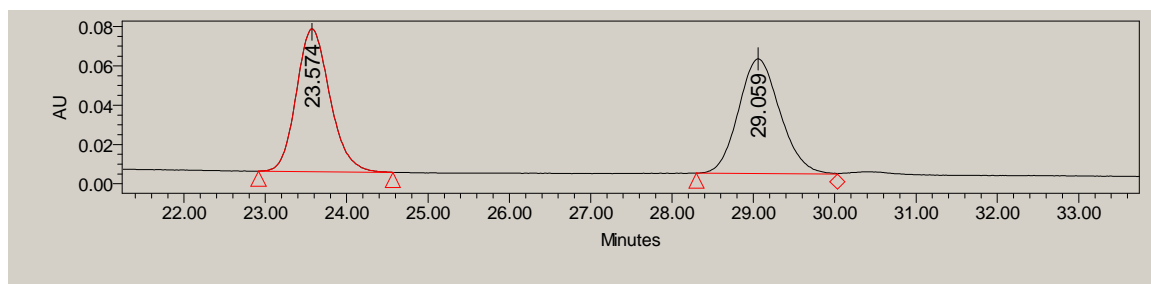

|   | Retention Time | % Area |
|---|----------------|--------|
| 1 | 23.574         | 50.03  |
| 2 | 29.059         | 49.97  |

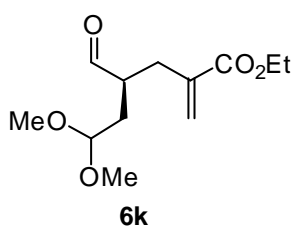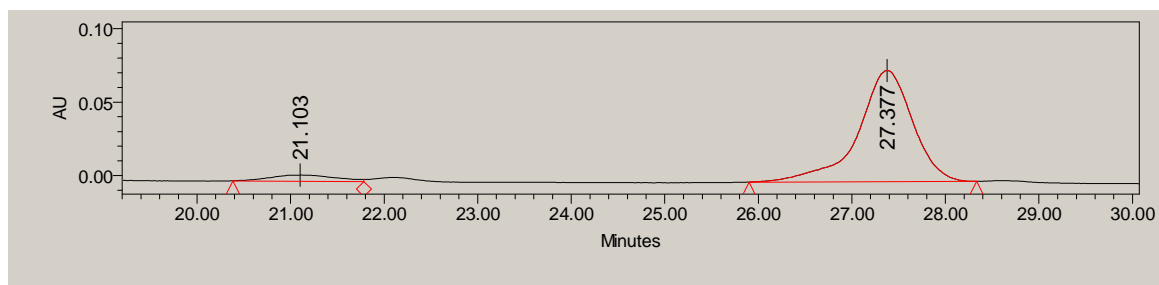

|   | Retention Time | % Area |
|---|----------------|--------|
| 2 | 21.103         | 6.32   |
| 1 | 27.377         | 93.68  |

Chiralpak IC, 70:30 hexane:*i*PrOH, 0.5mL/min,  $\lambda=210\text{nm}$

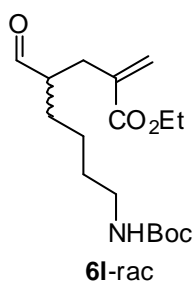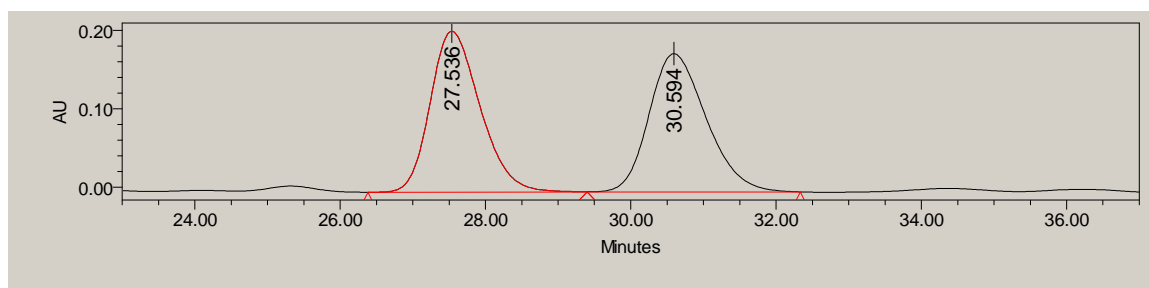

|   | Retention Time | % Area |
|---|----------------|--------|
| 1 | 27.536         | 50.39  |
| 2 | 30.594         | 49.61  |

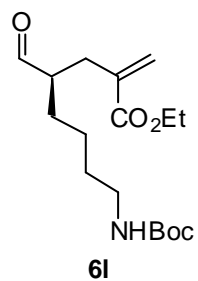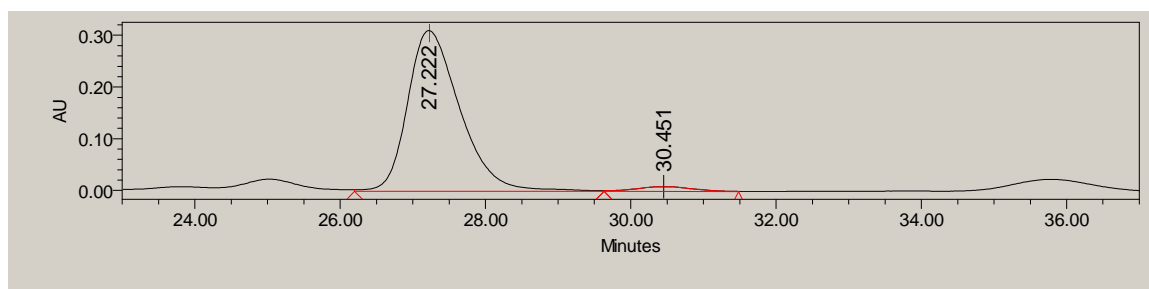

|   | Retention Time | % Area |
|---|----------------|--------|
| 2 | 30.451         | 3.03   |
| 1 | 27.222         | 96.97  |

Chiralpak IC, 85:15 hexane:*i*PrOH, 0.5mL/min,  $\lambda=210\text{nm}$

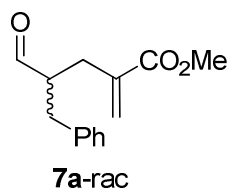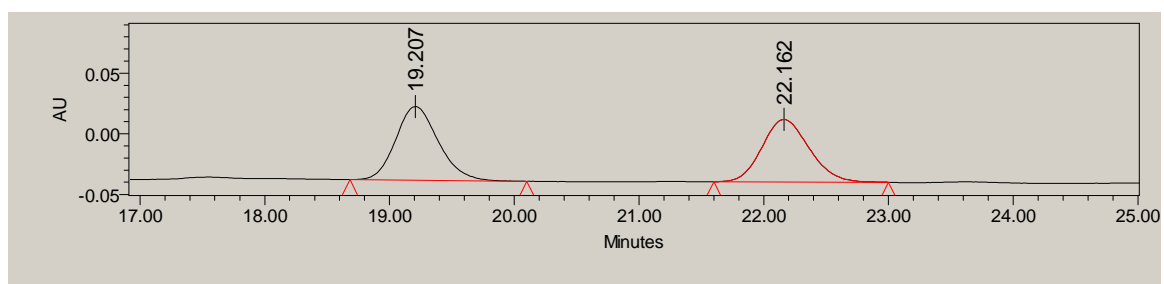

|   | Retention Time | % Area |
|---|----------------|--------|
| 2 | 22.162         | 48.37  |
| 1 | 19.207         | 51.63  |

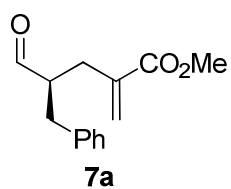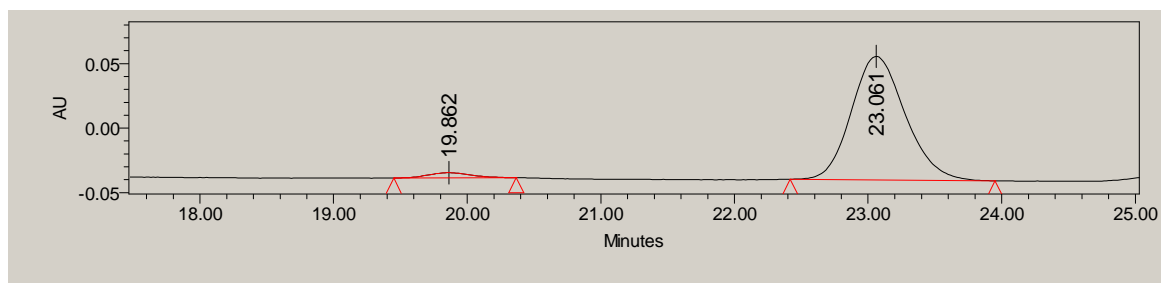

|   | Retention Time | % Area |
|---|----------------|--------|
| 1 | 19.862         | 3.23   |
| 2 | 23.061         | 96.77  |

Chiralpak IC, 90:10 hexane:*i*PrOH, 0.5mL/min,  $\lambda=210\text{nm}$

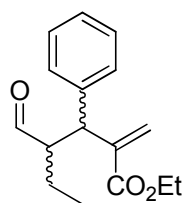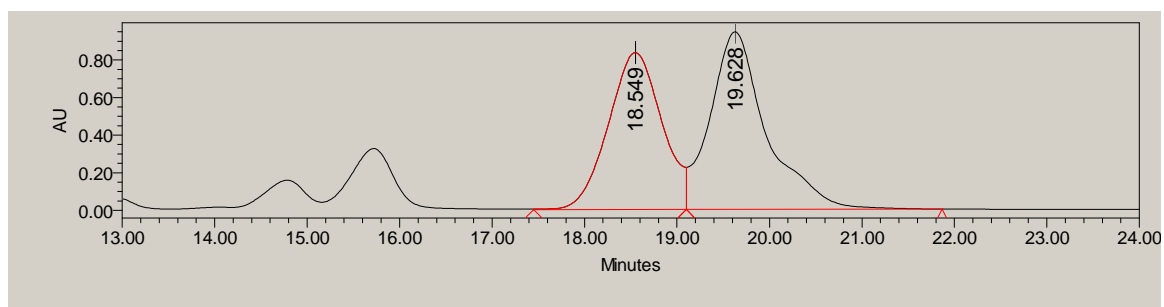

|   | Retention Time | % Area |
|---|----------------|--------|
| 1 | 18.547         | 47.51  |
| 2 | 19.627         | 52.49  |

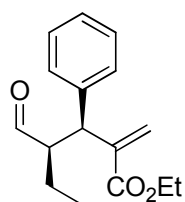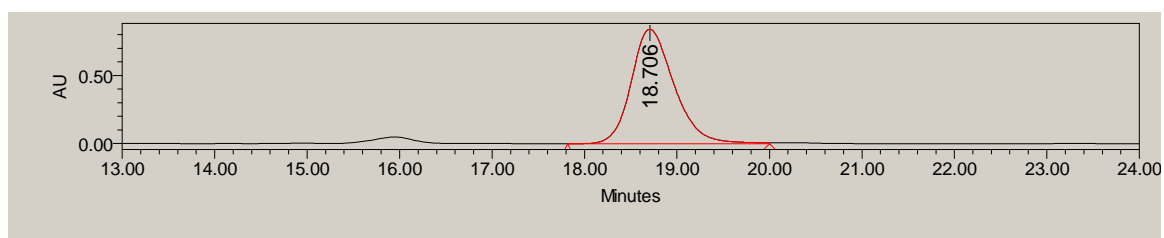

|   | Retention Time | % Area |
|---|----------------|--------|
| 1 | 18.706         | 100.00 |



Chiralpak OD, 99:1 hexane:*i*PrOH, 0.5mL/min,  $\lambda=214\text{nm}$

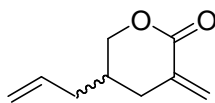

**10-rac**

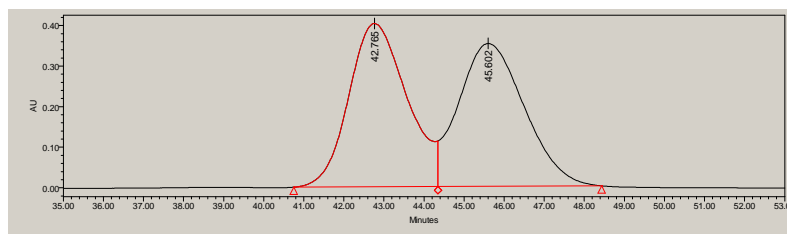

|   | Retention Time | % Area |
|---|----------------|--------|
| 1 | 42.765         | 50.35  |
| 2 | 45.602         | 49.65  |

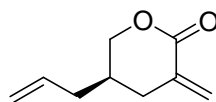

**10**

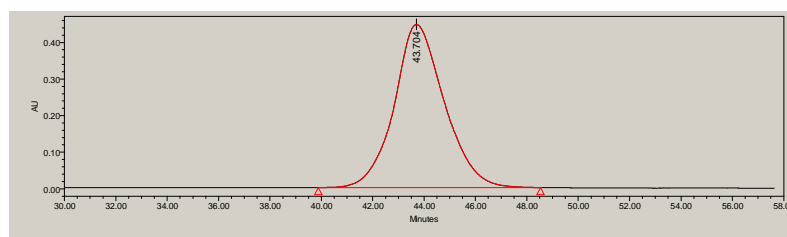

|   | Retention Time | % Area |
|---|----------------|--------|
| 1 | 43.704         | 100.00 |

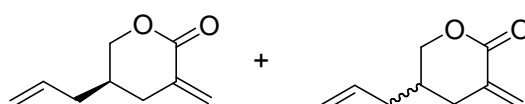

**10**

**10-rac**

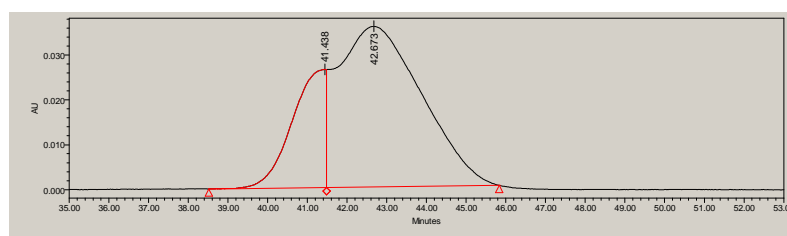

Chiralpak IC, 98:2 hexane:*i*PrOH:EtOH, 0.5mL/min,  $\lambda=210\text{nm}$

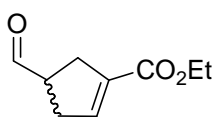

**11e-rac**

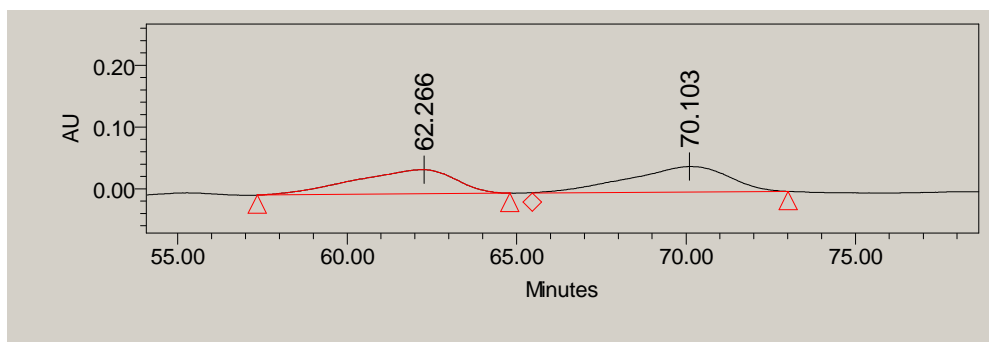

|   | Retention Time | % Area |
|---|----------------|--------|
| 1 | 62.266         | 48.79  |
| 2 | 70.103         | 51.21  |

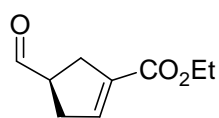

**11e**

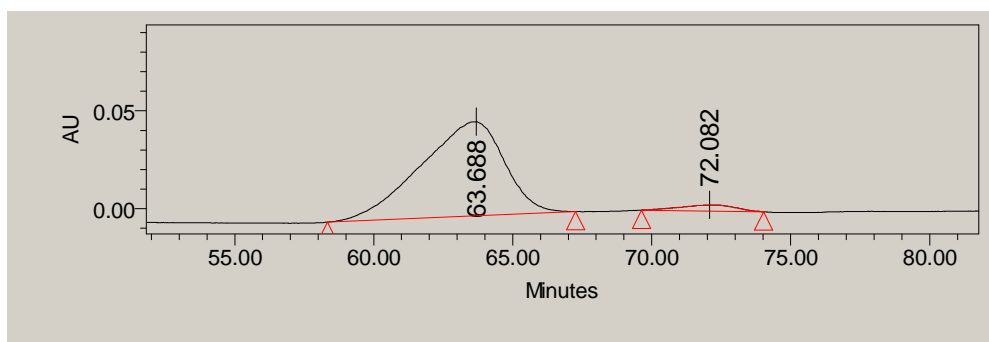

|   | Retention Time | % Area |
|---|----------------|--------|
| 1 | 63.688         | 95.94  |
| 2 | 72.082         | 4.06   |

Chiralpak IC, 85:15 hexane:*i*PrOH, 0.5mL/min,  $\lambda=210\text{nm}$

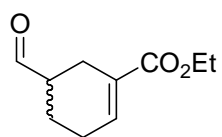

**11f-rac**

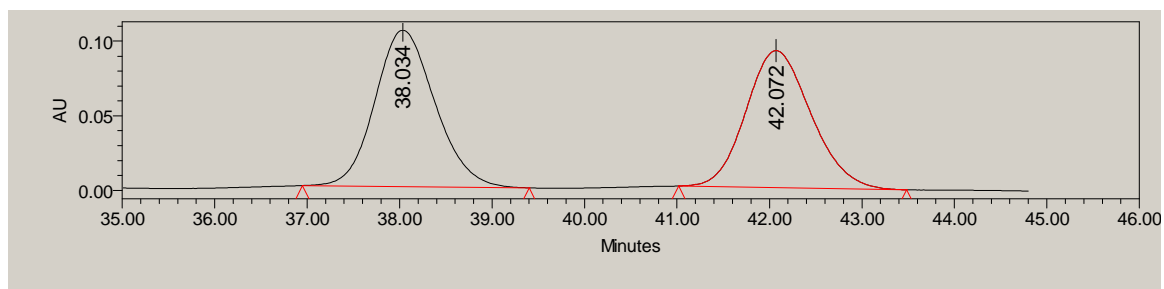

|   | Retention Time | % Area |
|---|----------------|--------|
| 2 | 42.072         | 48.72  |
| 1 | 38.034         | 51.28  |

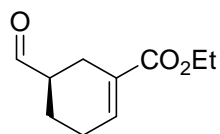

**11f**

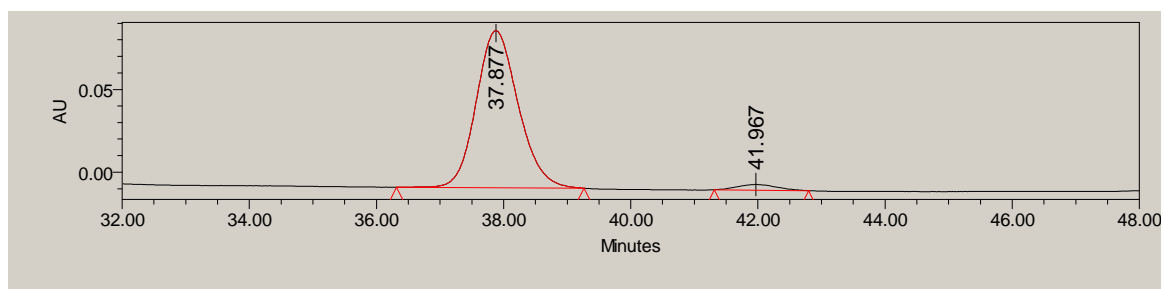

|   | Retention Time | % Area |
|---|----------------|--------|
| 1 | 37.877         | 96.78  |
| 2 | 41.967         | 3.22   |

## 6. Computational Methods

All reported structures were optimized at DFT level using the B3LYP<sup>9</sup> hybrid functional as implemented in Gaussian 09.<sup>10</sup> Optimizations were carried out using the standard 6-31G\* basis set for all implied atoms H, C, N, O. All energy minima and transition structures were characterized by harmonic frequency analysis at the same level. The energies reported in this work include thermal and zero-point vibrational energy corrections (ZPVE) and are not scaled. The stationary points were characterized by frequency calculations in order to verify that they have the right number of negative eigenvalues. The intrinsic reaction coordinates (IRC)<sup>11</sup> were followed to verify the energy profiles connecting each TS to the correct associated local minima. Atomic charges and charge transfer values were calculated within the natural bond orbital (NBO) analysis.<sup>12</sup>

The transformation depicted in Figure S1 was considered for calculations, wherein the enamine derived from acetaldehyde and simple pyrrolidine, dimethylaminopyridine (DMAP), and methyl 2-bromomethyl acrylate are the intervening species. Based on previous experimental evidence, the whole transformation would involve two formal consecutive substitution reactions, namely (1) that of DMAP with 2-bromomethyl acrylate to yield the pyridinium salt, and (2) substitution of the pyridinium moiety with the incoming enamine. Accordingly, both processes were calculated separately, and for each substitution event the feasibility of either S<sub>N</sub>2 or S<sub>N</sub>2' mechanism was studied.

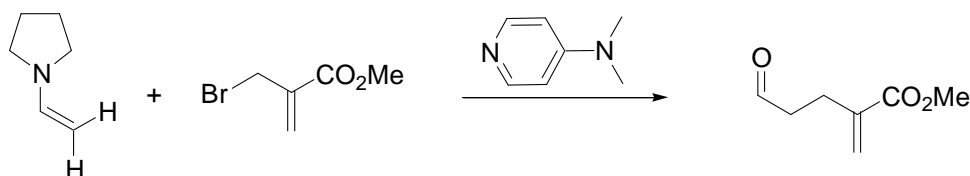

**Figure S1.** The model reaction considered for computational study.

Figure S2 shows the energy profiles corresponding to the S<sub>N</sub>2 pathways. As the calculated values indicate, both processes are highly disfavored with exceedingly high activation energies of 20.7 (TS1) and 24.3 kcal/mol (TS2), respectively. These values are comparatively much higher than those corresponding to transition states for the S<sub>N</sub>2' pathway (see below), and therefore the S<sub>N</sub>2 mechanism could be ruled out.

<sup>9</sup> (a) Lee, C.; Yang, W.; Parr, R.G. *Phys. Rev. B* **1988**, *37*, 785. (b) Becke, A.D. *J. Chem. Phys.* **1993**, *98*, 5648. (c) Kohn, W.; Becke, A.D.; Parr, R.G. *J. Phys. Chem.* **1996**, *100*, 12974.

<sup>10</sup> Frisch, M. J.; Trucks, G. W.; Schlegel, H. B.; Scuseria, G. E.; Robb, M. A.; Cheeseman, J. R.; Scalmani, G.; Barone, V.; Mennucci, B.; Petersson, G. A.; Nakatsuji, H.; Caricato, M.; Li, X.; Hratchian, H. P.; Izmaylov, A. F.; Bloino, J.; Zheng, G.; Sonnenberg, J. L.; Hada, M.; Ehara, M.; Toyota, K.; Fukuda, R.; Hasegawa, J.; Ishida, M.; Nakajima, T.; Honda, Y.; Kitao, O.; Nakai, H.; Vreven, T.; Montgomery, J. A., Jr.; Peralta, J. E.; Ogliaro, F.; Bearpark, M.; Heyd, J. J.; Brothers, E.; Kudin, K. N.; Staroverov, V. N.; Kobayashi, R.; Normand, J.; Raghavachari, K.; Rendell, A.; Burant, J. C.; Iyengar, S. S.; Tomasi, J.; Cossi, M.; Rega, N.; Millam, J. M.; Klene, M.; Knox, J.E.; Cross, J.B.; Bakken, V.; Adamo, C.; Jaramillo, J.; Gomperts, R.; Stratmann, R.E.; Yazyev, O.; Austin, A. J.; Cammi, R.; Pomelli, C.; Ochterski, J. W.; Martin, R. L.; Morokuma, K.; Zakrewski, V. G.; Voth, G. A.; Salvador, P.; Dannenberg, J. J.; Dapprich, S.; Daniels, A. D.; Farkas, O.; Foresman, J. B.; Ortiz, J. V.; Cioslowski, J.; Fox, D. J. *Gaussian 09*, Revision A.02, Gaussian, Inc., Wallingford CT, **2009**.

<sup>11</sup> Gonzalez, C.; Schlegel, H.B. *J. Phys. Chem.* **1990**, *94*, 5523.

<sup>12</sup> (a) Reed, A. E.; Weinstock, R. B.; Weinhold, F. *J. Chem. Phys.* **1985**, *83*, 735. (b) Reed, A. E.; Curtiss, L. A.; Weinhold, F. *Chem. Rev.* **1988**, *88*, 899.

**Figure S2.**  $S_N2$  substitution mechanism for the two reaction steps.

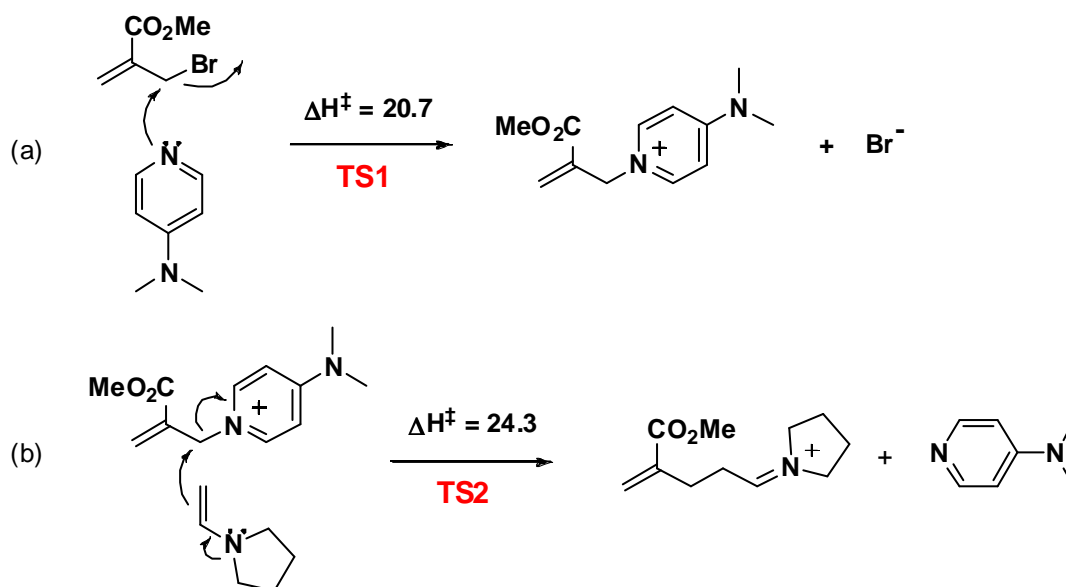

Regarding the allylic displacement proposal (Figure S3), the calculations indicated that step (a), in which DMAP reacts with 2-bromomethyl acrylate, proceeds via an asynchronous  $S_N2'$  pathway, wherein the transition state carries a partial carbanion character and a “pseudointermediate” (**I**) can be identified. In its turn, step (b), in which the incoming enamine formally displaces the pyridinium moiety, proceeds via a two-step addition-elimination sequence. Thus, the 1,4-addition zwitterionic species **II** clearly appears as a reaction intermediate. It should be noted that the iminium product formed at the end of this process lies higher in energy than the starting pyridinium salt, and therefore subsequent hydrolysis of the iminium product with recovery of free pyrrolidine must account as the driven force for the whole transformation.

**Figure S3.** Minimum energy profile for the allylic substitution ( $S_N2'$ ) pathway.

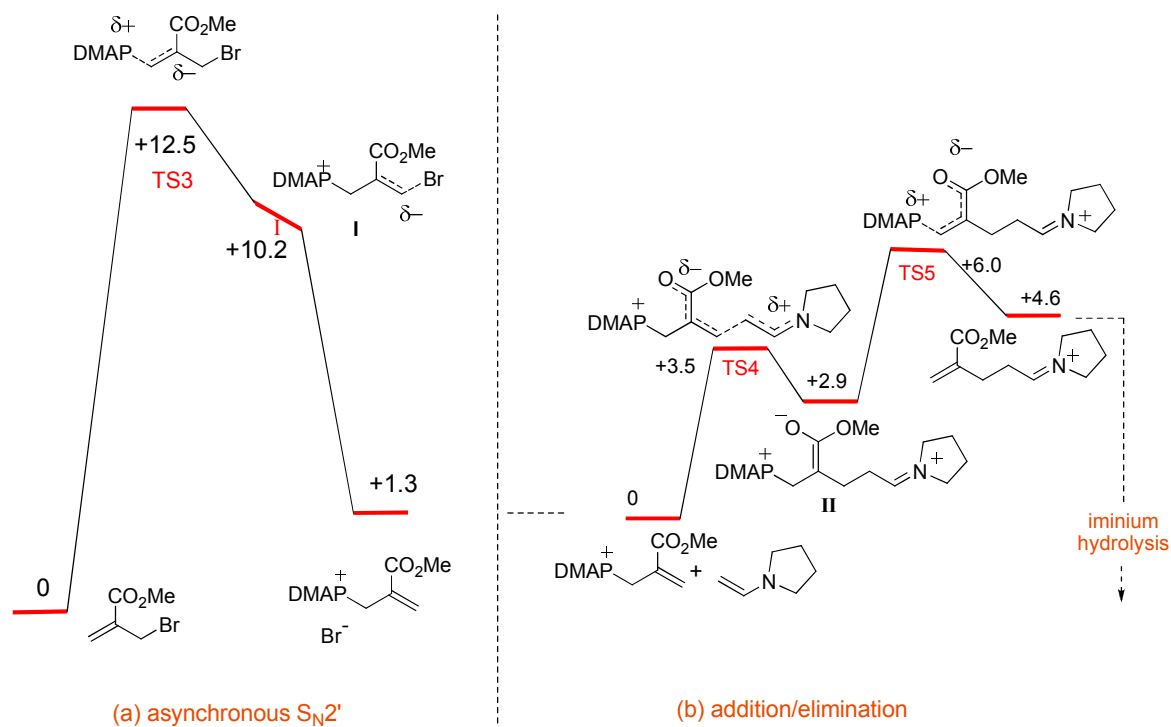

### Wiberg bond orders

The Wiberg bond orders and bond lengths corresponding to the significant breaking/forming bonds were also calculated for selected structures in Figure S3.

For step (a), these values (Table S1) are in agreement with a very asynchronous transition state (**TS3**), wherein bond **a** (N-C) is partially formed (BO = 0.53, 1.82 Å) before bond **d** (C-Br) starts to break (BO = 0.81, 2.13 Å). The reaction coordinate continues through a shoulder (**I**) showing partial maximum and minimum character, which contains a fully formed C-N bond and a partially broken C-Br bond.

For step (b), the Michael addition of enamine to the pyridinium adduct proceeds through transition state **TS4** (BO = 0.85 and 0.52) and renders the zwitterionic intermediate **II** with equally formed C-N (BO = 0.82, 1.54 Å) and C-C bonds (BO = 0.82, 1.68 Å). The elimination of DMAP from **II** renders the final iminium product through transition state **TS5**, which shows opposite bond orders to **TS4** (BO = 0.46 for C-N, and 0.89 for C-C). Noteworthy, the structure **I** (step a) presents mixed features of both the minimum **II** and the maximum **TS5** (see bond orders).

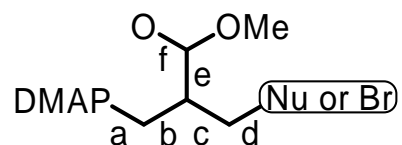

**Table S1.** Wiberg bond orders for the significant bonds of structures in Figure S3

|  |            | <b>a</b>     | <b>b</b> | <b>c</b> | <b>d</b>     | <b>e</b> | <b>f</b> |
|--|------------|--------------|----------|----------|--------------|----------|----------|
|  | <b>TS3</b> | <b>0.531</b> | 1.308    | 1.157    | <b>0.812</b> | 1.138    | 1.624    |
|  | <b>I</b>   | <b>0.827</b> | 1.052    | 1.327    | <b>0.616</b> | 1.204    | 1.533    |
|  | <b>TS4</b> | <b>0.854</b> | 1.042    | 1.354    | <b>0.524</b> | 1.170    | 1.581    |
|  | <b>II</b>  | <b>0.825</b> | 1.073    | 1.118    | <b>0.818</b> | 1.264    | 1.542    |
|  | <b>TS5</b> | <b>0.458</b> | 1.394    | 1.042    | <b>0.894</b> | 1.153    | 1.637    |

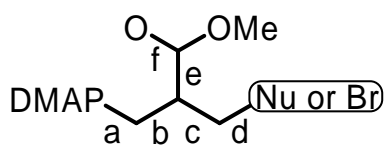

**Table S2.** Bond lengths in Å for the breaking/forming bonds of structures in Figure S2

|  |            | <b>a</b> | <b>b</b> | <b>c</b> | <b>d</b> | <b>e</b> | <b>f</b> |
|--|------------|----------|----------|----------|----------|----------|----------|
|  | <b>TS3</b> | 1.82     | 1.41     | 1.45     | 2.13     | 1.45     | 1.23     |
|  | <b>I</b>   | 1.53     | 1.48     | 1.41     | 2.30     | 1.43     | 1.24     |
|  | <b>TS4</b> | 1.52     | 1.49     | 1.41     | 1.99     | 1.44     | 1.23     |
|  | <b>II</b>  | 1.54     | 1.48     | 1.46     | 1.68     | 1.42     | 1.24     |
|  | <b>TS5</b> | 1.91     | 1.40     | 1.49     | 1.62     | 1.45     | 1.23     |



## Reaction with $\beta$ -substituted 2-(bromomethyl)acrylate

The energies for the three possible ammonium intermediate species resulting from the displacement of Br atom of the starting bromide **14** were calculated. Structures **B** and **C** resulted more stable than **A** by large. We presume that both **B** and **C** might arise from **14** via a double  $S_N2'$  process.

The prevalence of the bromide salts corresponding to structures **B** and **C** in solution was confirmed by  $^1\text{H}$  NMR analysis of an aliquot taken from the reaction mixture of DABCO and **14** in  $\text{CH}_2\text{Cl}_2$  (see  $^1\text{H}$  NMR spectrum on page S31).

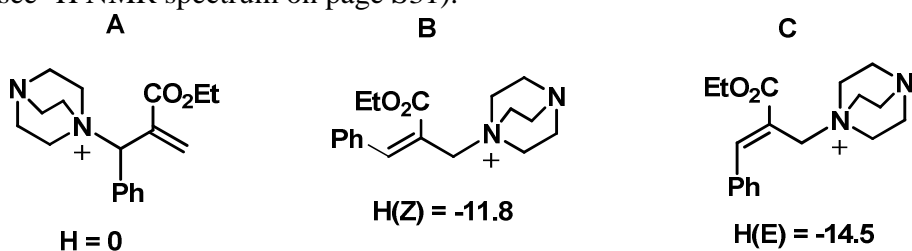

**Cartesian Coordinates and absolute energies** (in hartrees) of the structures discussed in the Main Text.

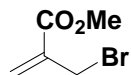

Standard orientation:

| Atomic Type | Coordinates (Angstroms) |         |         |
|-------------|-------------------------|---------|---------|
|             | X                       | Y       | Z       |
| C           | -0.6050                 | -1.5370 | 1.3270  |
| C           | -0.4350                 | 2.5460  | 0.5060  |
| C           | -0.7260                 | 0.3890  | -0.3950 |
| C           | -0.8350                 | -1.0720 | -0.0730 |
| C           | -1.1590                 | -1.9100 | -1.0670 |
| H           | -1.0730                 | -0.8950 | 2.0690  |
| H           | -0.9020                 | -2.5750 | 1.4670  |
| H           | -1.2540                 | -2.9790 | -0.9030 |
| H           | -1.3290                 | -1.5310 | -2.0690 |
| H           | 0.4240                  | 2.7570  | -0.1360 |
| H           | -0.2920                 | 2.9790  | 1.4960  |
| H           | -1.3380                 | 2.9430  | 0.0360  |
| O           | -0.7950                 | 0.8600  | -1.5120 |
| O           | -0.5620                 | 1.1310  | 0.7200  |
| Br          | 1.3380                  | -1.4870 | 1.7960  |

Sum of electronic and thermal Enthalpies= -2916.762979  
Sum of electronic and thermal Free Energies= -2916.809088

**TS1**

Standard orientation:

| Atomic Type | Coordinates (Angstroms) |         |         |
|-------------|-------------------------|---------|---------|
|             | X                       | Y       | Z       |
| C           | 2.9225                  | -0.7085 | 1.4285  |
| C           | 3.2685                  | 3.4715  | 1.7185  |
| C           | 2.7345                  | 1.5625  | 0.4605  |
| C           | 2.8405                  | 0.0765  | 0.3415  |
| C           | 2.7115                  | -0.4405 | -1.0335 |
| H           | 3.0135                  | -0.2865 | 2.4215  |
| H           | 2.9395                  | -1.7915 | 1.3425  |
| H           | 3.0685                  | -1.4335 | -1.2575 |
| H           | 2.6215                  | 0.2575  | -1.8475 |
| H           | 3.7435                  | 3.9715  | 0.8715  |
| H           | 3.8085                  | 3.6855  | 2.6415  |
| H           | 2.2285                  | 3.8015  | 1.7935  |
| O           | 2.1175                  | 2.2595  | -0.3285 |
| O           | 3.3395                  | 2.0465  | 1.5565  |
| N           | 0.8365                  | -0.9475 | -1.1215 |
| Br          | 5.1975                  | 0.2165  | -1.4435 |
| C           | -0.1135                 | 0.0035  | -1.1285 |
| H           | 0.2435                  | 1.0235  | -1.0095 |
| C           | 0.4635                  | -2.2255 | -1.2715 |
| H           | 1.2625                  | -2.9625 | -1.2725 |
| C           | -1.4565                 | -0.2875 | -1.2725 |
| H           | -2.1665                 | 0.5295  | -1.2685 |
| C           | -1.8795                 | -1.6335 | -1.4225 |
| C           | -0.8545                 | -2.6155 | -1.4195 |

|   |         |         |         |
|---|---------|---------|---------|
| H | -1.0775 | -3.6675 | -1.5365 |
| N | -3.1965 | -1.9665 | -1.5635 |
| C | -3.5845 | -3.3615 | -1.7325 |
| H | -3.2755 | -3.9715 | -0.8735 |
| H | -3.1485 | -3.7955 | -2.6415 |
| H | -4.6695 | -3.4225 | -1.8155 |
| C | -4.2165 | -0.9245 | -1.5795 |
| H | -4.0715 | -0.2285 | -2.4165 |
| H | -4.2165 | -0.3475 | -0.6455 |
| H | -5.1975 | -1.3875 | -1.6895 |

Sum of electronic and thermal Enthalpies= -3298.816030  
 Sum of electronic and thermal Free Energies= -3298.886938  
 Frequency: 382.3i

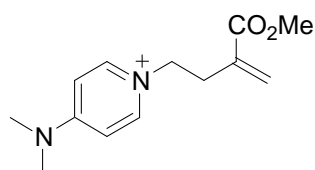

Standard orientation:

| Atomic Type | Coordinates (Angstroms) |         |         |
|-------------|-------------------------|---------|---------|
|             | X                       | Y       | Z       |
| C           | 4.2050                  | -0.5610 | 0.5550  |
| C           | 2.7210                  | 3.0370  | 2.1420  |
| C           | 2.7590                  | 1.4620  | 0.3860  |
| C           | 3.3100                  | 0.1670  | -0.1240 |
| C           | 2.8280                  | -0.2210 | -1.5020 |
| H           | 4.5640                  | -0.2440 | 1.5280  |
| H           | 4.6170                  | -1.4830 | 0.1510  |
| H           | 3.4010                  | -1.0680 | -1.8870 |
| H           | 2.9390                  | 0.6120  | -2.1990 |
| H           | 3.0350                  | 3.8600  | 1.4970  |
| H           | 3.1800                  | 3.1180  | 3.1270  |
| H           | 1.6320                  | 3.0280  | 2.2200  |
| O           | 1.9940                  | 2.1440  | -0.2760 |
| O           | 3.1920                  | 1.7790  | 1.6070  |
| N           | 1.3880                  | -0.6100 | -1.5340 |
| C           | 0.4350                  | 0.2560  | -1.9720 |
| H           | 0.7850                  | 1.2370  | -2.2650 |
| C           | 1.0100                  | -1.8440 | -1.1020 |
| H           | 1.8070                  | -2.4900 | -0.7520 |
| C           | -0.8910                 | -0.0860 | -2.0080 |
| H           | -1.5920                 | 0.6530  | -2.3710 |
| C           | -1.3240                 | -1.3740 | -1.5730 |
| C           | -0.2960                 | -2.2510 | -1.1070 |
| H           | -0.5190                 | -3.2490 | -0.7550 |
| N           | -2.6180                 | -1.7420 | -1.5980 |
| C           | -3.0220                 | -3.0760 | -1.1400 |
| H           | -2.7630                 | -3.2260 | -0.0860 |
| H           | -2.5500                 | -3.8600 | -1.7420 |
| H           | -4.1020                 | -3.1730 | -1.2410 |
| C           | -3.6440                 | -0.8110 | -2.0840 |
| H           | -3.4610                 | -0.5330 | -3.1270 |
| H           | -3.6760                 | 0.0960  | -1.4700 |
| H           | -4.6170                 | -1.2960 | -2.0260 |

Sum of electronic and thermal Enthalpies= -726.951067  
 Sum of electronic and thermal Free Energies= -727.014603

**TS2**

Standard orientation:

| Atomic Type | Coordinates (Angstroms) |         |         |
|-------------|-------------------------|---------|---------|
|             | X                       | Y       | Z       |
| C           | 1.2360                  | 0.5545  | -1.4150 |
| C           | 1.9460                  | 1.7675  | 2.5300  |
| C           | 5.6590                  | -1.7985 | 0.9200  |
| C           | 4.8750                  | -0.6795 | 0.2140  |
| C           | 1.3330                  | 2.4165  | 0.3480  |
| C           | 3.8990                  | -0.6055 | -2.0640 |
| C           | 1.1260                  | 1.9715  | -1.0740 |
| C           | 4.8300                  | -2.7165 | -1.1420 |
| C           | 0.8000                  | 2.9125  | -1.9800 |
| C           | 5.0750                  | -3.0915 | 0.3240  |
| C           | 3.4810                  | 0.7155  | -2.0290 |
| H           | 1.5340                  | -0.1685 | -0.6770 |
| H           | 1.0260                  | 0.2225  | -2.4190 |
| H           | 0.6380                  | 2.6675  | -3.0260 |
| H           | 0.7050                  | 3.9495  | -1.6780 |
| H           | 3.9820                  | -0.3725 | 0.7720  |
| H           | 4.0270                  | -3.2885 | -1.6160 |
| H           | 5.7410                  | -2.8385 | -1.7420 |
| H           | 3.8070                  | 1.3695  | -1.2280 |
| H           | 5.7430                  | -3.9495 | 0.4240  |
| H           | 4.1260                  | -3.3435 | 0.8110  |
| H           | 2.7030                  | 2.5495  | 2.6220  |
| H           | 6.7240                  | -1.7185 | 0.6780  |
| H           | 2.2690                  | 0.8525  | 3.0260  |
| H           | 5.5620                  | -1.7455 | 2.0070  |
| H           | 1.0060                  | 2.1275  | 2.9540  |
| H           | 3.7110                  | -1.1965 | -2.9600 |
| H           | 5.4770                  | 0.2175  | 0.0300  |
| H           | 3.2580                  | 1.1945  | -2.9750 |
| N           | 4.4680                  | -1.2855 | -1.0680 |
| O           | 1.1410                  | 3.5465  | 0.7380  |
| O           | 1.7620                  | 1.4105  | 1.1420  |
| N           | -0.7790                 | 0.0015  | -0.8950 |
| C           | -0.9950                 | -1.2125 | -0.3620 |
| H           | -0.1130                 | -1.8145 | -0.1540 |
| C           | -1.8490                 | 0.7645  | -1.1630 |
| H           | -1.6460                 | 1.7465  | -1.5830 |
| C           | -3.1490                 | 0.3645  | -0.9200 |
| H           | -3.9570                 | 1.0425  | -1.1630 |
| C           | -2.2520                 | -1.7085 | -0.0790 |
| H           | -2.3390                 | -2.6965 | 0.3530  |
| C           | -3.4010                 | -0.9165 | -0.3560 |
| N           | -4.6600                 | -1.3555 | -0.0960 |
| C           | -4.8710                 | -2.6795 | 0.4860  |
| H           | -4.3880                 | -2.7675 | 1.4670  |
| H           | -4.4860                 | -3.4715 | -0.1680 |
| H           | -5.9400                 | -2.8425 | 0.6200  |
| C           | -5.8110                 | -0.5075 | -0.3970 |
| H           | -5.8670                 | -0.2735 | -1.4670 |
| H           | -5.7750                 | 0.4315  | 0.1680  |
| H           | -6.7240                 | -1.0345 | -0.1190 |

Sum of electronic and thermal Enthalpies= -1016.726193

Sum of electronic and thermal Free Energies= -1016.813039

Frequency: 422.4i

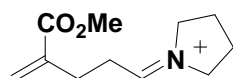

Standard orientation:

| Atomic Type | Coordinates (Angstroms) |         |         |
|-------------|-------------------------|---------|---------|
|             | X                       | Y       | Z       |
| C           | -1.6030                 | -0.9865 | -0.7515 |
| C           | -0.9060                 | 2.9845  | 0.4335  |
| C           | 3.3070                  | -0.6205 | 1.2495  |
| C           | 2.1010                  | -0.3485 | 0.3365  |
| C           | -2.2750                 | 1.5265  | -0.8225 |
| C           | 0.6940                  | -1.9545 | -0.9255 |
| C           | -2.5280                 | 0.1075  | -1.2355 |
| C           | 2.5360                  | -2.7655 | 0.4955  |
| C           | -3.5920                 | -0.1335 | -2.0105 |
| C           | 3.0980                  | -2.0665 | 1.7335  |
| C           | -0.2240                 | -0.9405 | -1.4965 |
| H           | -1.4300                 | -0.8785 | 0.3235  |
| H           | -2.0720                 | -1.9625 | -0.9165 |
| H           | -3.8490                 | -1.1375 | -2.3385 |
| H           | -4.2380                 | 0.6805  | -2.3245 |
| H           | 1.2540                  | 0.0975  | 0.8645  |
| H           | 1.9340                  | -3.6545 | 0.6935  |
| H           | 3.3270                  | -3.0165 | -0.2205 |
| H           | 0.1900                  | 0.0665  | -1.4265 |
| H           | 4.0220                  | -2.5375 | 2.0765  |
| H           | 2.3730                  | -2.1055 | 2.5535  |
| H           | -0.7350                 | 3.6545  | -0.4115 |
| H           | 4.2380                  | -0.5385 | 0.6795  |
| H           | -0.0150                 | 2.9095  | 1.0575  |
| H           | 3.3550                  | 0.0985  | 2.0695  |
| H           | -1.7540                 | 3.3515  | 1.0155  |
| H           | 0.5080                  | -3.0075 | -1.1405 |
| H           | 2.3360                  | 0.2715  | -0.5325 |
| H           | -0.3910                 | -1.1805 | -2.5535 |
| N           | 1.6790                  | -1.7105 | -0.1325 |
| O           | -2.9620                 | 2.4715  | -1.1365 |
| O           | -1.1680                 | 1.6415  | -0.0355 |

Sum of electronic and thermal Enthalpies= -634.671558

Sum of electronic and thermal Free Energies= -634.731413

### TS3

Standard orientation:

| Atomic Type | Coordinates (Angstroms) |         |         |
|-------------|-------------------------|---------|---------|
|             | X                       | Y       | Z       |
| C           | 3.1020                  | -0.4280 | 2.3075  |
| C           | 3.3500                  | 3.6780  | 1.4715  |
| C           | 2.9250                  | 1.5040  | 0.6545  |
| C           | 2.8690                  | 0.0890  | 0.9675  |
| C           | 2.7040                  | -0.7910 | -0.1265 |
| H           | 3.0450                  | 0.3150  | 3.0955  |
| H           | 2.5450                  | -1.3270 | 2.5605  |
| H           | 3.0920                  | -1.8010 | -0.0055 |
| H           | 2.8830                  | -0.3600 | -1.1085 |

|    |         |         |         |
|----|---------|---------|---------|
| H  | 4.1020  | 3.8880  | 0.7055  |
| H  | 3.6360  | 4.1400  | 2.4185  |
| H  | 2.3890  | 4.0780  | 1.1295  |
| O  | 2.6850  | 2.0060  | -0.4415 |
| O  | 3.2620  | 2.2790  | 1.7355  |
| N  | 0.9720  | -1.2570 | -0.4235 |
| Br | 5.0620  | -1.1880 | 2.6215  |
| C  | 0.0120  | -0.5420 | 0.1695  |
| H  | 0.3790  | 0.2340  | 0.8405  |
| C  | 0.6310  | -2.2410 | -1.2675 |
| H  | 1.4530  | -2.7850 | -1.7265 |
| C  | -1.3300 | -0.7810 | -0.0455 |
| H  | -2.0570 | -0.1640 | 0.4665  |
| C  | -1.7300 | -1.8190 | -0.9285 |
| C  | -0.6840 | -2.5580 | -1.5455 |
| H  | -0.8910 | -3.3690 | -2.2315 |
| N  | -3.0440 | -2.0930 | -1.1705 |
| C  | -3.4130 | -3.1670 | -2.0855 |
| H  | -3.0410 | -4.1400 | -1.7365 |
| H  | -3.0230 | -2.9890 | -3.0955 |
| H  | -4.5000 | -3.2240 | -2.1485 |
| C  | -4.0860 | -1.3110 | -0.5165 |
| H  | -4.0200 | -0.2480 | -0.7845 |
| H  | -4.0290 | -1.3980 | 0.5755  |
| H  | -5.0620 | -1.6800 | -0.8345 |

Sum of electronic and thermal Enthalpies= -3298.829108

Sum of electronic and thermal Free Energies= -3298.900497

Frequency: 227.8i

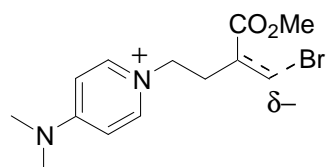

Standard orientation:

| Atomic Type | Coordinates (Angstroms) |         |         |
|-------------|-------------------------|---------|---------|
|             | X                       | Y       | Z       |
| C           | 3.0230                  | -0.6640 | 1.4270  |
| C           | 2.7390                  | 3.5380  | 1.6830  |
| C           | 2.4140                  | 1.5620  | 0.4310  |
| C           | 2.5270                  | 0.1370  | 0.3770  |
| C           | 2.2910                  | -0.4780 | -0.9520 |
| H           | 3.1810                  | -0.1830 | 2.3850  |
| H           | 2.6640                  | -1.6850 | 1.5080  |
| H           | 2.8940                  | -1.3810 | -1.0830 |
| H           | 2.5000                  | 0.2210  | -1.7650 |
| H           | 3.2840                  | 4.0490  | 0.8830  |
| H           | 3.1560                  | 3.8110  | 2.6540  |
| H           | 1.6860                  | 3.8340  | 1.6270  |
| O           | 1.8910                  | 2.2680  | -0.4510 |
| O           | 2.8860                  | 2.1230  | 1.5850  |
| N           | 0.8400                  | -0.9100 | -1.1840 |
| Br          | 5.1690                  | -1.4290 | 1.0660  |
| C           | -0.1250                 | 0.0400  | -1.1750 |
| H           | 0.2420                  | 1.0560  | -1.0310 |
| C           | 0.4920                  | -2.2050 | -1.3320 |

|   |         |         |         |
|---|---------|---------|---------|
| H | 1.3070  | -2.9190 | -1.3290 |
| C | -1.4510 | -0.2830 | -1.3290 |
| H | -2.1690 | 0.5250  | -1.3170 |
| C | -1.8640 | -1.6390 | -1.4820 |
| C | -0.8180 | -2.6020 | -1.4740 |
| H | -1.0080 | -3.6610 | -1.5810 |
| N | -3.1790 | -1.9550 | -1.6260 |
| C | -3.6920 | -3.3170 | -1.7220 |
| H | -2.8890 | -4.0490 | -1.7110 |
| H | -4.2560 | -3.4450 | -2.6540 |
| H | -4.3590 | -3.5340 | -0.8780 |
| C | -4.1930 | -0.9020 | -1.6260 |
| H | -4.0150 | -0.1770 | -2.4290 |
| H | -4.2240 | -0.3690 | -0.6680 |
| H | -5.1690 | -1.3590 | -1.7930 |

-----  
Sum of electronic and thermal Enthalpies= -3298.831826  
Sum of electronic and thermal Free Energies= -3298.901066

## TS4

Standard orientation:

| Atomic<br>Type | Coordinates (Angstroms) |         |         |
|----------------|-------------------------|---------|---------|
|                | X                       | Y       | Z       |
| C              | 1.3590                  | -1.2925 | -0.2545 |
| C              | 2.0840                  | 2.7805  | 0.3915  |
| C              | 6.4040                  | -0.0325 | 0.6825  |
| C              | 5.1310                  | -0.2175 | -0.1595 |
| C              | 0.7240                  | 1.1025  | -0.5765 |
| C              | 3.8910                  | -2.2795 | -0.7585 |
| C              | 0.4960                  | -0.3065 | -0.7785 |
| C              | 5.8100                  | -2.3575 | 0.8135  |
| C              | -0.6110                 | -0.6505 | -1.7205 |
| C              | 6.3760                  | -1.2175 | 1.6655  |
| C              | 2.8770                  | -1.6415 | -1.4915 |
| H              | 1.9390                  | -1.0105 | 0.6185  |
| H              | 0.9810                  | -2.3115 | -0.2005 |
| H              | -0.4590                 | -1.6245 | -2.1935 |
| H              | -0.7250                 | 0.1035  | -2.5035 |
| H              | 4.2700                  | 0.3325  | 0.2385  |
| H              | 5.2940                  | -3.1295 | 1.3905  |
| H              | 6.5970                  | -2.8385 | 0.2175  |
| H              | 3.0610                  | -0.6245 | -1.8215 |
| H              | 7.3600                  | -1.4575 | 2.0755  |
| H              | 5.7020                  | -1.0065 | 2.5035  |
| H              | 2.1740                  | 3.3575  | -0.5325 |
| H              | 7.2910                  | -0.0945 | 0.0425  |
| H              | 3.0110                  | 2.8285  | 0.9635  |
| H              | 6.4250                  | 0.9375  | 1.1855  |
| H              | 1.2540                  | 3.1835  | 0.9785  |
| H              | 3.8460                  | -3.3575 | -0.6075 |
| H              | 5.2620                  | 0.0815  | -1.2055 |
| H              | 2.3810                  | -2.2645 | -2.2315 |
| N              | 4.8580                  | -1.6685 | -0.0835 |
| O              | -0.0280                 | 2.0045  | -0.9585 |
| O              | 1.8770                  | 1.3875  | 0.1065  |
| N              | -1.9840                 | -0.7415 | -1.0705 |
| C              | -2.5870                 | 0.3935  | -0.6275 |
| H              | -2.0120                 | 1.3035  | -0.7735 |
| C              | -2.6140                 | -1.9295 | -0.9085 |

|   |         |         |         |
|---|---------|---------|---------|
| H | -2.0930 | -2.8025 | -1.2845 |
| C | -3.8450 | -2.0325 | -0.3105 |
| H | -4.2880 | -3.0145 | -0.2195 |
| C | -3.8190 | 0.3665  | -0.0245 |
| H | -4.2430 | 1.3065  | 0.3015  |
| C | -4.5130 | -0.8645 | 0.1625  |
| N | -5.7280 | -0.9225 | 0.7495  |
| C | -6.3840 | 0.3025  | 1.2125  |
| H | -6.5530 | 0.9995  | 0.3825  |
| H | -5.7890 | 0.8045  | 1.9835  |
| H | -7.3520 | 0.0465  | 1.6425  |
| C | -6.4060 | -2.2095 | 0.9215  |
| H | -5.8110 | -2.8915 | 1.5395  |
| H | -6.6060 | -2.6865 | -0.0455 |
| H | -7.3600 | -2.0435 | 1.4215  |

-----  
Sum of electronic and thermal Enthalpies= -1016.759395

Sum of electronic and thermal Free Energies= -1016.841832

Frequency: 286.9i

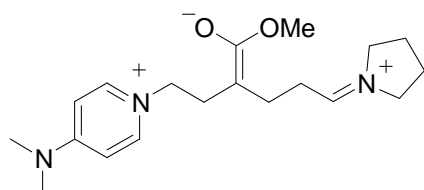

-----  
Standard orientation:

| Atomic Type | Coordinates (Angstroms) |         |         |
|-------------|-------------------------|---------|---------|
|             | X                       | Y       | Z       |
| C           | 1.5030                  | -1.3085 | -0.4085 |
| C           | 2.2390                  | 2.7375  | 0.3455  |
| C           | 6.3590                  | -0.1715 | 0.8445  |
| C           | 5.1270                  | -0.2785 | -0.0705 |
| C           | 0.8300                  | 1.1085  | -0.6515 |
| C           | 3.8480                  | -2.2765 | -0.7915 |
| C           | 0.5870                  | -0.2705 | -0.8915 |
| C           | 5.7730                  | -2.4985 | 0.7455  |
| C           | -0.5350                 | -0.5825 | -1.8075 |
| C           | 6.2940                  | -1.4375 | 1.7185  |
| C           | 2.7970                  | -1.5275 | -1.4545 |
| H           | 1.9490                  | -1.0455 | 0.5525  |
| H           | 1.0330                  | -2.2935 | -0.3135 |
| H           | -0.4060                 | -1.5335 | -2.3335 |
| H           | -0.6950                 | 0.2105  | -2.5425 |
| H           | 4.2490                  | 0.2485  | 0.3145  |
| H           | 5.2550                  | -3.3355 | 1.2175  |
| H           | 6.5800                  | -2.8925 | 0.1155  |
| H           | 3.1060                  | -0.5255 | -1.7475 |
| H           | 7.2610                  | -1.7125 | 2.1445  |
| H           | 5.5840                  | -1.3045 | 2.5425  |
| H           | 2.2970                  | 3.3585  | -0.5525 |
| H           | 7.2760                  | -0.1715 | 0.2465  |
| H           | 3.1860                  | 2.7685  | 0.8885  |
| H           | 6.3460                  | 0.7495  | 1.4315  |
| H           | 1.4310                  | 3.1175  | 0.9775  |
| H           | 3.7650                  | -3.3585 | -0.7035 |
| H           | 5.3150                  | 0.0805  | -1.0875 |
| H           | 2.4100                  | -2.0715 | -2.3175 |
| N           | 4.8280                  | -1.7365 | -0.1085 |



|   |         |         |         |
|---|---------|---------|---------|
| O | 0.0840  | 2.0495  | -0.9625 |
| O | 2.0250  | 1.3605  | 0.0105  |
| N | -1.9050 | -0.7225 | -1.1165 |
| C | -2.4260 | 0.3605  | -0.4825 |
| H | -1.8090 | 1.2555  | -0.5255 |
| C | -2.5950 | -1.8845 | -1.1145 |
| H | -2.1350 | -2.7135 | -1.6415 |
| C | -3.8110 | -2.0175 | -0.4895 |
| H | -4.3050 | -2.9785 | -0.5275 |
| C | -3.6410 | 0.3045  | 0.1545  |
| H | -4.0040 | 1.2045  | 0.6315  |
| C | -4.3970 | -0.9035 | 0.1785  |
| N | -5.5970 | -0.9875 | 0.7965  |
| C | -6.1690 | 0.1845  | 1.4615  |
| H | -6.3280 | 1.0055  | 0.7535  |
| H | -5.5210 | 0.5365  | 2.2735  |
| H | -7.1330 | -0.0855 | 1.8895  |
| C | -6.3440 | -2.2465 | 0.7905  |
| H | -5.7770 | -3.0475 | 1.2775  |
| H | -6.5920 | -2.5575 | -0.2315 |
| H | -7.2760 | -2.1095 | 1.3385  |

-----  
Sum of electronic and thermal Enthalpies= -1016.760349  
Sum of electronic and thermal Free Energies= -1016.843614

## TS5

Standard orientation:

| Atomic<br>Type | Coordinates (Angstroms) |         |         |
|----------------|-------------------------|---------|---------|
|                | X                       | Y       | Z       |
| C              | 1.6450                  | -1.0460 | -0.7685 |
| C              | 2.5260                  | 2.8390  | 0.5005  |
| C              | 6.4030                  | -0.4680 | 1.1175  |
| C              | 5.2430                  | -0.3100 | 0.1205  |
| C              | 1.0380                  | 1.4300  | -0.6915 |
| C              | 3.9410                  | -2.0440 | -1.0775 |
| C              | 0.7750                  | 0.0950  | -1.1795 |
| C              | 5.7420                  | -2.6880 | 0.4835  |
| C              | -0.3100                 | -0.0710 | -2.0495 |
| C              | 6.2200                  | -1.8840 | 1.6945  |
| C              | 2.9830                  | -1.1050 | -1.6705 |
| H              | 1.9610                  | -0.9570 | 0.2755  |
| H              | 1.1260                  | -2.0040 | -0.8775 |
| H              | -0.3490                 | -0.9650 | -2.6695 |
| H              | -0.6920                 | 0.8230  | -2.5315 |
| H              | 4.3560                  | 0.1640  | 0.5515  |
| H              | 5.1590                  | -3.5800 | 0.7235  |
| H              | 6.5770                  | -2.9700 | -0.1675 |
| H              | 3.3780                  | -0.0910 | -1.7275 |
| H              | 7.1400                  | -2.2940 | 2.1165  |
| H              | 5.4540                  | -1.8900 | 2.4775  |
| H              | 2.5680                  | 3.5800  | -0.3015 |
| H              | 7.3620                  | -0.3920 | 0.5945  |
| H              | 3.4940                  | 2.7620  | 0.9985  |
| H              | 6.3800                  | 0.3090  | 1.8845  |
| H              | 1.7570                  | 3.1430  | 1.2155  |
| H              | 3.8040                  | -3.1140 | -1.2285 |
| H              | 5.5160                  | 0.2420  | -0.7825 |
| H              | 2.6950                  | -1.4430 | -2.6695 |
| N              | 4.8870                  | -1.7140 | -0.2525 |
| O              | 0.3140                  | 2.4110  | -0.8215 |

|   |         |         |         |
|---|---------|---------|---------|
| O | 2.2480  | 1.5310  | -0.0235 |
| N | -1.9700 | -0.4490 | -1.1825 |
| C | -2.3620 | 0.3740  | -0.1945 |
| H | -1.6860 | 1.1940  | 0.0295  |
| C | -2.7710 | -1.4690 | -1.5265 |
| H | -2.4220 | -2.1030 | -2.3385 |
| C | -3.9780 | -1.7200 | -0.9055 |
| H | -4.5700 | -2.5630 | -1.2375 |
| C | -3.5540 | 0.2090  | 0.4805  |
| H | -3.8130 | 0.9170  | 1.2575  |
| C | -4.4210 | -0.8670 | 0.1425  |
| N | -5.6040 | -1.0690 | 0.7825  |
| C | -6.0330 | -0.1550 | 1.8385  |
| H | -6.1520 | 0.8690  | 1.4615  |
| H | -5.3180 | -0.1410 | 2.6695  |
| H | -6.9950 | -0.4870 | 2.2275  |
| C | -6.4740 | -2.1730 | 0.3885  |
| H | -5.9730 | -3.1410 | 0.5125  |
| H | -6.7980 | -2.0780 | -0.6565 |
| H | -7.3620 | -2.1700 | 1.0195  |

-----  
Sum of electronic and thermal Enthalpies= -1016.755399

Sum of electronic and thermal Free Energies= -1016.839415

Frequency: 209.1i

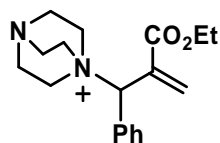

Standard orientation:

| Center Number | Atomic Number | Atomic Type | Coordinates (Angstroms) |           |           |
|---------------|---------------|-------------|-------------------------|-----------|-----------|
|               |               |             | X                       | Y         | Z         |
| 1             | 6             | 0           | -0.117528               | -0.446756 | 0.091087  |
| 2             | 6             | 0           | 3.950835                | -1.379228 | -0.582981 |
| 3             | 6             | 0           | 2.230749                | -1.091205 | 1.038769  |
| 4             | 6             | 0           | 0.759234                | -0.822267 | 1.280873  |
| 5             | 6             | 0           | 0.341954                | -1.018940 | 2.539330  |
| 6             | 1             | 0           | 1.064700                | -1.314016 | 3.293591  |
| 7             | 1             | 0           | 4.600638                | -0.674572 | -0.056924 |
| 8             | 1             | 0           | 4.147953                | -2.378537 | -0.186623 |
| 9             | 1             | 0           | 0.482813                | -0.631889 | -0.798263 |
| 10            | 1             | 0           | -0.689996               | -0.924572 | 2.852622  |
| 11            | 8             | 0           | 3.016426                | -1.340882 | 1.924701  |
| 12            | 8             | 0           | 2.563080                | -1.039625 | -0.268296 |
| 13            | 7             | 0           | -0.319098               | 1.124561  | -0.014535 |
| 14            | 6             | 0           | -1.200478               | 1.709901  | 1.072293  |
| 15            | 1             | 0           | -0.796100               | 1.377032  | 2.029278  |
| 16            | 1             | 0           | -2.192618               | 1.282176  | 0.933462  |
| 17            | 6             | 0           | -1.209417               | 3.264405  | 0.934603  |
| 18            | 1             | 0           | -0.673462               | 3.728476  | 1.767165  |
| 19            | 1             | 0           | -2.239792               | 3.629650  | 0.959831  |
| 20            | 6             | 0           | 1.033629                | 1.826285  | 0.053232  |
| 21            | 1             | 0           | 1.696150                | 1.314576  | -0.645940 |
| 22            | 1             | 0           | 1.412026                | 1.671386  | 1.064692  |
| 23            | 6             | 0           | 0.840928                | 3.336091  | -0.277796 |
| 24            | 1             | 0           | 1.286637                | 3.578550  | -1.246655 |
| 25            | 1             | 0           | 1.341426                | 3.947741  | 0.478031  |
| 26            | 6             | 0           | -0.945807               | 1.455144  | -1.362526 |
| 27            | 1             | 0           | -1.854077               | 0.859536  | -1.452167 |
| 28            | 1             | 0           | -0.235120               | 1.118099  | -2.121239 |
| 29            | 6             | 0           | -1.214693               | 2.987222  | -1.435447 |
| 30            | 1             | 0           | -0.828120               | 3.388000  | -2.376664 |
| 31            | 1             | 0           | -2.288843               | 3.190484  | -1.407365 |
| 32            | 7             | 0           | -0.579347               | 3.685914  | -0.317134 |
| 33            | 6             | 0           | 4.112863                | -1.310746 | -2.087296 |
| 34            | 1             | 0           | 3.915029                | -0.302505 | -2.466584 |
| 35            | 1             | 0           | 3.442549                | -2.014579 | -2.590542 |
| 36            | 1             | 0           | 5.141856                | -1.573679 | -2.352601 |

|    |   |   |           |           |           |
|----|---|---|-----------|-----------|-----------|
| 37 | 6 | 0 | -1.409126 | -1.231521 | -0.089778 |
| 38 | 6 | 0 | -3.679609 | -2.831827 | -0.581970 |
| 39 | 6 | 0 | -2.462830 | -1.293446 | 0.839647  |
| 40 | 6 | 0 | -1.520748 | -1.992879 | -1.265550 |
| 41 | 6 | 0 | -2.640397 | -2.788014 | -1.510260 |
| 42 | 6 | 0 | -3.586513 | -2.081003 | 0.591433  |
| 43 | 1 | 0 | -2.427221 | -0.737160 | 1.769234  |
| 44 | 1 | 0 | -0.714321 | -1.977198 | -1.994875 |
| 45 | 1 | 0 | -2.695736 | -3.372305 | -2.423709 |
| 46 | 1 | 0 | -4.387893 | -2.112510 | 1.323467  |
| 47 | 1 | 0 | -4.553695 | -3.448729 | -0.766763 |

-----  
Sum of electronic and thermal Enthalpies= -960.224978  
Sum of electronic and thermal Free Energies= -960.295821

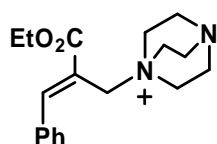

## E

Standard orientation:

| Center Number | Atomic Number | Atomic Type | Coordinates (Angstroms) |           |           |
|---------------|---------------|-------------|-------------------------|-----------|-----------|
|               |               |             | X                       | Y         | Z         |
| 1             | 6             | 0           | -1.400129               | 1.073875  | -0.041636 |
| 2             | 6             | 0           | -4.118831               | -2.098034 | 0.122311  |
| 3             | 6             | 0           | -1.975069               | -1.288466 | -0.519128 |
| 4             | 6             | 0           | -1.029388               | -0.124199 | -0.558541 |
| 5             | 6             | 0           | 0.261229                | -0.416736 | -1.280413 |
| 6             | 1             | 0           | 0.084737                | -1.180351 | -2.038895 |
| 7             | 1             | 0           | -4.302217               | -2.426119 | -0.904265 |
| 8             | 1             | 0           | -3.682189               | -2.936304 | 0.673078  |
| 9             | 1             | 0           | -2.355639               | 1.072565  | 0.479028  |
| 10            | 1             | 0           | 0.685193                | 0.468756  | -1.747490 |
| 11            | 8             | 0           | -1.694571               | -2.372421 | -1.009331 |
| 12            | 8             | 0           | -3.134930               | -1.019283 | 0.083666  |
| 13            | 6             | 0           | -5.364911               | -1.552991 | 0.788866  |
| 14            | 1             | 0           | -5.778087               | -0.711798 | 0.224075  |
| 15            | 1             | 0           | -5.154951               | -1.220577 | 1.810256  |
| 16            | 1             | 0           | -6.124788               | -2.339797 | 0.835064  |
| 17            | 7             | 0           | 1.407960                | -0.973071 | -0.412007 |

|    |   |   |           |           |           |
|----|---|---|-----------|-----------|-----------|
| 18 | 6 | 0 | 0.988571  | -2.177916 | 0.419710  |
| 19 | 1 | 0 | 0.490842  | -2.875846 | -0.253172 |
| 20 | 1 | 0 | 0.249593  | -1.812865 | 1.134897  |
| 21 | 6 | 0 | 2.530024  | -1.407591 | -1.344857 |
| 22 | 1 | 0 | 2.745381  | -0.562422 | -2.003381 |
| 23 | 1 | 0 | 2.127917  | -2.223885 | -1.949500 |
| 24 | 6 | 0 | 2.253058  | -2.759782 | 1.118315  |
| 25 | 1 | 0 | 2.494589  | -3.746444 | 0.713414  |
| 26 | 1 | 0 | 2.066603  | -2.880141 | 2.189104  |
| 27 | 6 | 0 | 3.758643  | -1.838624 | -0.490610 |
| 28 | 1 | 0 | 4.587301  | -1.138110 | -0.626272 |
| 29 | 1 | 0 | 4.105039  | -2.826363 | -0.806628 |
| 30 | 6 | 0 | 1.947839  | 0.092977  | 0.527019  |
| 31 | 1 | 0 | 2.299594  | 0.914342  | -0.101683 |
| 32 | 1 | 0 | 1.105590  | 0.453105  | 1.118757  |
| 33 | 6 | 0 | 3.081438  | -0.534626 | 1.393410  |
| 34 | 1 | 0 | 3.977673  | 0.090067  | 1.344444  |
| 35 | 1 | 0 | 2.776281  | -0.592489 | 2.441870  |
| 36 | 7 | 0 | 3.412088  | -1.883563 | 0.930578  |
| 37 | 6 | 0 | -0.711866 | 2.373043  | -0.045412 |
| 38 | 6 | 0 | 0.528708  | 4.895721  | 0.071992  |
| 39 | 6 | 0 | -0.044605 | 2.898605  | -1.168998 |
| 40 | 6 | 0 | -0.781148 | 3.158045  | 1.122207  |
| 41 | 6 | 0 | -0.149472 | 4.397956  | 1.186873  |
| 42 | 6 | 0 | 0.565107  | 4.150041  | -1.109411 |
| 43 | 1 | 0 | -0.063991 | 2.363900  | -2.114032 |
| 44 | 1 | 0 | -1.328906 | 2.785820  | 1.984398  |
| 45 | 1 | 0 | -0.203218 | 4.983647  | 2.099636  |
| 46 | 1 | 0 | 1.052908  | 4.553054  | -1.992132 |
| 47 | 1 | 0 | 1.005241  | 5.870529  | 0.114565  |

-----  
Sum of electronic and thermal Enthalpies= -960.248068  
Sum of electronic and thermal Free Energies= -960.320446

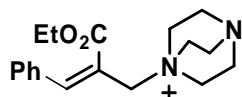

**Z**

Standard orientation:

-----  
Center    Atomic    Atomic    Coordinates (Angstroms)

| Number | Number | Type | X         | Y         | Z         |
|--------|--------|------|-----------|-----------|-----------|
| 1      | 6      | 0    | 0.906851  | -0.851985 | -0.847009 |
| 2      | 6      | 0    | 2.401387  | 3.130790  | 0.164326  |
| 3      | 6      | 0    | 0.607097  | 1.654542  | -0.330722 |
| 4      | 6      | 0    | 0.171927  | 0.294988  | -0.784176 |
| 5      | 6      | 0    | -1.204823 | 0.303707  | -1.401449 |
| 6      | 1      | 0    | -1.448512 | 1.299519  | -1.771587 |
| 7      | 1      | 0    | 2.011643  | 3.833124  | -0.577258 |
| 8      | 1      | 0    | 1.981886  | 3.401170  | 1.137971  |
| 9      | 1      | 0    | -1.277284 | -0.416746 | -2.219978 |
| 10     | 8      | 0    | -0.193033 | 2.570260  | -0.192052 |
| 11     | 8      | 0    | 1.922514  | 1.794500  | -0.181471 |
| 12     | 6      | 0    | 3.915441  | 3.082694  | 0.176847  |
| 13     | 1      | 0    | 4.307831  | 2.802116  | -0.805130 |
| 14     | 1      | 0    | 4.284709  | 2.365975  | 0.916470  |
| 15     | 1      | 0    | 4.306444  | 4.072773  | 0.433016  |
| 16     | 7      | 0    | -2.383966 | -0.063793 | -0.466159 |
| 17     | 6      | 0    | -2.368231 | 0.733171  | 0.830554  |
| 18     | 1      | 0    | -2.258553 | 1.782771  | 0.560121  |
| 19     | 1      | 0    | -1.464930 | 0.430498  | 1.362658  |
| 20     | 6      | 0    | -3.680658 | 0.243736  | -1.199788 |
| 21     | 1      | 0    | -3.629016 | -0.261774 | -2.167494 |
| 22     | 1      | 0    | -3.686976 | 1.322417  | -1.372480 |
| 23     | 6      | 0    | -3.667682 | 0.410414  | 1.625659  |
| 24     | 1      | 0    | -4.310095 | 1.293444  | 1.684122  |
| 25     | 1      | 0    | -3.417638 | 0.117061  | 2.648991  |
| 26     | 6      | 0    | -4.880945 | -0.234199 | -0.328648 |
| 27     | 1      | 0    | -5.401376 | -1.065074 | -0.812962 |
| 28     | 1      | 0    | -5.599912 | 0.580199  | -0.205244 |
| 29     | 6      | 0    | -2.367988 | -1.540393 | -0.119705 |
| 30     | 1      | 0    | -2.442313 | -2.084457 | -1.065192 |
| 31     | 1      | 0    | -1.396176 | -1.751902 | 0.328629  |
| 32     | 6      | 0    | -3.558713 | -1.843897 | 0.840575  |
| 33     | 1      | 0    | -4.149126 | -2.677569 | 0.450503  |
| 34     | 1      | 0    | -3.189955 | -2.133644 | 1.828292  |
| 35     | 7      | 0    | -4.423549 | -0.672964 | 0.990706  |
| 36     | 1      | 0    | 0.433532  | -1.653293 | -1.418869 |
| 37     | 6      | 0    | 2.198867  | -1.261542 | -0.302940 |
| 38     | 6      | 0    | 4.645649  | -2.250278 | 0.663910  |
| 39     | 6      | 0    | 2.888099  | -2.285343 | -0.986572 |
| 40     | 6      | 0    | 2.746255  | -0.769786 | 0.898843  |
| 41     | 6      | 0    | 3.953582  | -1.265983 | 1.377214  |
| 42     | 6      | 0    | 4.110441  | -2.759283 | -0.521409 |
| 43     | 1      | 0    | 2.464139  | -2.696308 | -1.899726 |
| 44     | 1      | 0    | 2.214773  | -0.016513 | 1.466918  |

|    |   |   |          |           |           |
|----|---|---|----------|-----------|-----------|
| 45 | 1 | 0 | 4.356558 | -0.890198 | 2.313067  |
| 46 | 1 | 0 | 4.636722 | -3.532875 | -1.072042 |
| 47 | 1 | 0 | 5.591056 | -2.629603 | 1.040508  |

-----  
Sum of electronic and thermal Enthalpies= -960.243773  
Sum of electronic and thermal Free Energies= -960.315467
